# Supplementary material
Source: publisher figshare collection journal article supplement (https://gsajournals.figshare.com/ndownloader/files/17896790)
Supplement: Supplementary file 1 [file 17896790]

Table S22. GWAS result for bulliform cell column number in both environments combined
SNP	Chromosome	Position	P.value	maf	nobs	Rsquare.of.Model.without.SNP	Rsquare.of.Model.with.SNP	FDR_Adjusted_P-values
S4_136976844	4	140081599	3.52E-06	0.1901566	447	0.082200343	0.127714269	0.469325951
S8_162856715	8	167863131	4.00E-06	0.234899329	447	0.082200343	0.127173224	0.469325951
S9_136702932	9	139304909	7.05E-06	0.166666667	447	0.082200343	0.124828939	0.550974309
S8_162963457	8	167976156	1.77E-05	0.22147651	447	0.082200343	0.121042114	0.847901317
S7_99384211	7	102492805	1.81E-05	0.391498881	447	0.082200343	0.120950861	0.847901317
S8_162832854	8	167839202	2.17E-05	0.242729306	447	0.082200343	0.120195961	0.849531306
S4_7438177	4	8246929	2.93E-05	0.463087248	447	0.082200343	0.118974289	0.981759391
S5_44718981	5	46044085	4.56E-05	0.193512304	447	0.082200343	0.117174423	0.997234826
S5_213915999	5	219785234	5.62E-05	0.0950783	447	0.082200343	0.116324106	0.997234826
S2_236421677	2	240620964	7.06E-05	0.465324385	447	0.082200343	0.115399588	0.997234826
S10_4098652	10	3800883	8.03E-05	0.348993289	447	0.082200343	0.114878817	0.997234826
S1_262803473	1	267638818	8.27E-05	0.281879195	447	0.082200343	0.114760783	0.997234826
S2_179002952	2	184452652	9.27E-05	0.08836689	447	0.082200343	0.114301441	0.997234826
S3_215475012	3	219083777	9.31E-05	0.494407159	447	0.082200343	0.114283211	0.997234826
S9_101200340	9	104674247	0.000103024	0.100671141	447	0.082200343	0.113873763	0.997234826
S10_1917171	10	1476091	0.000117645	0.5	447	0.082200343	0.113338995	0.997234826
S7_155025563	7	160352792	0.000120726	0.279642058	447	0.082200343	0.113234926	0.997234826
S7_155258550	7	160633178	0.000132312	0.281879195	447	0.082200343	0.112866232	0.997234826
S9_153524775	9	156686015	0.000145503	0.249440716	447	0.082200343	0.112484232	0.997234826
S7_155025577	7	160352806	0.00014589	0.277404922	447	0.082200343	0.11247358	0.997234826
S3_27463160	3	26990159	0.000154322	0.116331096	447	0.082200343	0.112247922	0.997234826
S5_191128942	5	196487256	0.000168432	0.10738255	447	0.082200343	0.111896863	0.997234826
S7_99385216	7	102493810	0.000169994	0.214765101	447	0.082200343	0.111859843	0.997234826
S6_85193743	6	87939051	0.000172741	0.045861298	447	0.082200343	0.111795564	0.997234826
S2_108931143	2	112048025	0.000178055	0.140939597	447	0.082200343	0.111674118	0.997234826
S1_135597304	1	137760620	0.000179719	0.099552573	447	0.082200343	0.111636839	0.997234826
S3_114355768	3	114714882	0.000191692	0.323266219	447	0.082200343	0.111378452	0.997234826
S5_210304586	5	216143615	0.000199244	0.249440716	447	0.082200343	0.111223748	0.997234826
S9_145520169	9	148360352	0.00020241	0.137583893	447	0.082200343	0.111160639	0.997234826
S6_56539386	6	59172155	0.00020973	0.460850112	447	0.082200343	0.111018499	0.997234826
S9_153524816	9	156686056	0.000213408	0.247203579	447	0.082200343	0.110948959	0.997234826
S5_188647896	5	193665925	0.000216671	0.374720358	447	0.082200343	0.110888274	0.997234826
S5_191795032	5	197165293	0.000218753	0.371364653	447	0.082200343	0.110850027	0.997234826
S8_162963782	8	167976481	0.000228034	0.236017897	447	0.082200343	0.110683935	0.997234826
S9_153524827	9	156686067	0.000229052	0.248322148	447	0.082200343	0.110666135	0.997234826
S9_101200336	9	104674243	0.000229357	0.13310962	447	0.082200343	0.110660823	0.997234826
S7_153451745	7	158782116	0.000230757	0.338926174	447	0.082200343	0.110636507	0.997234826
S4_136971414	4	140076169	0.000234927	0.256152125	447	0.082200343	0.110564938	0.997234826
S9_26613221	9	26667569	0.000240101	0.124161074	447	0.082200343	0.110477919	0.997234826
S3_66909814	3	67117354	0.000248496	0.475391499	447	0.082200343	0.110340688	0.997234826
S3_215474970	3	219083735	0.000250054	0.498881432	447	0.082200343	0.110315741	0.997234826
S10_2837430	10	2428348	0.000250264	0.061521253	447	0.082200343	0.11031239	0.997234826
S6_24184878	6	25564971	0.000254786	0.3098434	447	0.082200343	0.110240904	0.997234826
S6_24184879	6	25564972	0.000254786	0.3098434	447	0.082200343	0.110240904	0.997234826
S3_12932255	3	12207993	0.000264458	0.375838926	447	0.082200343	0.110092228	0.997234826
S9_101199022	9	104672930	0.000265888	0.454138702	447	0.082200343	0.110070722	0.997234826
S8_162846026	8	167852442	0.00026945	0.239373602	447	0.082200343	0.110017642	0.997234826
S3_148612269	3	149896537	0.000269726	0.277404922	447	0.082200343	0.110013555	0.997234826
S10_2837471	10	2428389	0.000270717	0.065995526	447	0.082200343	0.109998925	0.997234826
S5_214060931	5	219932373	0.000276362	0.364653244	447	0.082200343	0.10991663	0.997234826
S9_101200332	9	104674239	0.000277578	0.135346756	447	0.082200343	0.109899131	0.997234826
S4_18688842	4	19870924	0.000277794	0.421700224	447	0.082200343	0.109896027	0.997234826
S10_4098832	10	3801063	0.000282465	0.274049217	447	0.082200343	0.10982955	0.997234826
S8_162963496	8	167976195	0.000282842	0.412751678	447	0.082200343	0.109824237	0.997234826
S2_179002949	2	184452649	0.000289365	0.086129754	447	0.082200343	0.109733369	0.997234826
S2_179002962	2	184452662	0.000289365	0.086129754	447	0.082200343	0.109733369	0.997234826
S1_21466929	1	21772042	0.000296943	0.101789709	447	0.082200343	0.109630363	0.997234826
S4_18688854	4	19870936	0.000299963	0.267337808	447	0.082200343	0.109590061	0.997234826
S7_155025581	7	160352810	0.000323087	0.389261745	447	0.082200343	0.109294391	0.997234826
S9_153524903	9	156686143	0.00033174	0.399328859	447	0.082200343	0.109189227	0.997234826
S5_179588094	5	183935886	0.000334984	0.293064877	447	0.082200343	0.109150521	0.997234826
S1_125460070	1	127620272	0.000352215	0.466442953	447	0.082200343	0.108951064	0.997234826
S3_13485024	3	12763056	0.000359989	0.446308725	447	0.082200343	0.108864297	0.997234826
S7_4034653	7	4201392	0.000367532	0.473154362	447	0.082200343	0.108781895	0.997234826
S7_153316447	7	158667675	0.000376445	0.431767338	447	0.082200343	0.108686717	0.997234826
S1_41437741	1	41802568	0.000398577	0.408277405	447	0.082200343	0.108459895	0.997234826
S2_120284040	2	124266451	0.000421097	0.326621924	447	0.082200343	0.108241837	0.997234826
S2_120284047	2	124266458	0.000421097	0.326621924	447	0.082200343	0.108241837	0.997234826
S3_173208703	3	175642713	0.000424405	0.495525727	447	0.082200343	0.108210802	0.997234826
S10_126898741	10	127934642	0.000428026	0.17114094	447	0.082200343	0.108177114	0.997234826
S6_35179101	6	36735566	0.000429025	0.348993289	447	0.082200343	0.108167872	0.997234826
S8_129505912	8	133395843	0.000429251	0.416107383	447	0.082200343	0.108165785	0.997234826
S2_2677784	2	2689674	0.000437728	0.170022371	447	0.082200343	0.108088254	0.997234826
S1_21466921	1	21772034	0.000443494	0.102908277	447	0.082200343	0.108036389	0.997234826
S5_213944990	5	219814225	0.000458884	0.118568233	447	0.082200343	0.107901217	0.997234826
S1_197262328	1	199709990	0.000466733	0.429530201	447	0.082200343	0.107834042	0.997234826
S9_101199756	9	104673664	0.000479796	0.408277405	447	0.082200343	0.107724731	0.997234826
S8_129505456	8	133395387	0.000504659	0.319910515	447	0.082200343	0.107524782	0.997234826
S6_166077936	6	170248933	0.000506978	0.451901566	447	0.082200343	0.107506644	0.997234826
S2_220670554	2	227456541	0.000507496	0.37360179	447	0.082200343	0.1075026	0.997234826
S5_66833411	5	68747633	0.000507969	0.237136465	447	0.082200343	0.107498916	0.997234826
S1_171591613	1	173491799	0.000531499	0.167785235	447	0.082200343	0.107319835	0.997234826
S1_280346153	1	285473193	0.000533852	0.052572707	447	0.082200343	0.107302376	0.997234826
S4_136976798	4	140081553	0.000534916	0.446308725	447	0.082200343	0.107294504	0.997234826
S9_13461573	9	13120424	0.0005354	0.401565996	447	0.082200343	0.107290924	0.997234826
S4_136967842	4	140072562	0.000541189	0.265100671	447	0.082200343	0.107248415	0.997234826
S10_4098821	10	3801052	0.000544431	0.276286353	447	0.082200343	0.107224806	0.997234826
S10_4098830	10	3801061	0.000544431	0.276286353	447	0.082200343	0.107224806	0.997234826
S10_4098831	10	3801062	0.000544431	0.276286353	447	0.082200343	0.107224806	0.997234826
S10_4098833	10	3801064	0.000544431	0.276286353	447	0.082200343	0.107224806	0.997234826
S10_4098836	10	3801067	0.000544431	0.276286353	447	0.082200343	0.107224806	0.997234826
S5_191795022	5	197165283	0.000546992	0.35458613	447	0.082200343	0.107206265	0.997234826
S9_151764569	9	154916197	0.000547367	0.324384787	447	0.082200343	0.107203556	0.997234826
S10_4098816	10	3801047	0.000553352	0.286353468	447	0.082200343	0.107160576	0.997234826
S1_223768471	1	227371073	0.000555635	0.274049217	447	0.082200343	0.10714431	0.997234826
S5_191795018	5	197165279	0.00055607	0.356823266	447	0.082200343	0.107141216	0.997234826
S5_191795020	5	197165281	0.000559689	0.35458613	447	0.082200343	0.107115587	0.997234826
S8_165266715	8	170452494	0.000578001	0.175615213	447	0.082200343	0.106988423	0.997234826
S3_148556258	3	149865920	0.000582413	0.495525727	447	0.082200343	0.106958395	0.997234826
S9_6999750	9	6588305	0.000583726	0.304250559	447	0.082200343	0.106949505	0.997234826
S1_198195305	1	200650163	0.000597102	0.353467562	447	0.082200343	0.106860059	0.997234826
S7_100241252	7	103378285	0.000597342	0.270693512	447	0.082200343	0.106858472	0.997234826
S8_163913143	8	168893218	0.00059913	0.345637584	447	0.082200343	0.106846672	0.997234826
S10_4098822	10	3801053	0.000600311	0.275167785	447	0.082200343	0.1068389	0.997234826
S7_155252481	7	160627109	0.00060144	0.089485459	447	0.082200343	0.106831488	0.997234826
S7_131037646	7	135067997	0.000606128	0.091722595	447	0.082200343	0.106800839	0.997234826
S5_191795021	5	197165282	0.000620899	0.353467562	447	0.082200343	0.106705839	0.997234826
S2_117313281	2	121217269	0.000622265	0.147651007	447	0.082200343	0.10669717	0.997234826
S5_130500047	5	134002975	0.000622884	0.374720358	447	0.082200343	0.106693248	0.997234826
S2_18112154	2	19321254	0.000623	0.294183445	447	0.082200343	0.106692509	0.997234826
S3_132255858	3	132868687	0.000630117	0.420581655	447	0.082200343	0.106647705	0.997234826
S2_109804655	2	112931162	0.000637204	0.116331096	447	0.082200343	0.106603595	0.997234826
S5_191129035	5	196487349	0.000643617	0.101789709	447	0.082200343	0.106564105	0.997234826
S5_191129038	5	196487352	0.000643617	0.101789709	447	0.082200343	0.106564105	0.997234826
S4_222030898	4	226369780	0.000646345	0.258389262	447	0.082200343	0.106547428	0.997234826
S3_148843136	3	150167928	0.000650084	0.486577181	447	0.082200343	0.106524687	0.997234826
S4_18688837	4	19870919	0.000658345	0.270693512	447	0.082200343	0.106474909	0.997234826
S4_18688840	4	19870922	0.000658345	0.270693512	447	0.082200343	0.106474909	0.997234826
S4_18688847	4	19870929	0.000658345	0.270693512	447	0.082200343	0.106474909	0.997234826
S4_18688833	4	19870915	0.000659718	0.419463087	447	0.082200343	0.106466694	0.997234826
S4_18688839	4	19870921	0.000659718	0.419463087	447	0.082200343	0.106466694	0.997234826
S2_4190294	2	4153999	0.00066282	0.463087248	447	0.082200343	0.106448203	0.997234826
S6_3312363	6	3353801	0.000675493	0.46196868	447	0.082200343	0.106373568	0.997234826
S5_199647762	5	204966992	0.000675873	0.104026846	447	0.082200343	0.106371351	0.997234826
S7_153316474	7	158667702	0.000678875	0.409395973	447	0.082200343	0.10635389	0.997234826
S5_188759845	5	193778657	0.000679644	0.372483221	447	0.082200343	0.106349425	0.997234826
S3_154710683	3	156288690	0.000684387	0.445190157	447	0.082200343	0.106322028	0.997234826
S4_155832746	4	159350413	0.000686243	0.098434004	447	0.082200343	0.106311359	0.997234826
S8_19851420	8	20545613	0.000696766	0.051454139	447	0.082200343	0.106251416	0.997234826
S6_24184877	6	25564970	0.00069747	0.431767338	447	0.082200343	0.106247435	0.997234826
S6_24184919	6	25565012	0.00069747	0.431767338	447	0.082200343	0.106247435	0.997234826
S7_4900269	7	5209379	0.000701678	0.285234899	447	0.082200343	0.106223747	0.997234826
S5_194560174	5	199881655	0.0007112	0.16442953	447	0.082200343	0.106170668	0.997234826
S4_18676302	4	19858384	0.000717722	0.213646532	447	0.082200343	0.106134727	0.997234826
S3_184272915	3	187248581	0.000720074	0.469798658	447	0.082200343	0.106121848	0.997234826
S2_12068453	2	12372324	0.000740978	0.414988814	447	0.082200343	0.10600921	0.997234826
S6_165981166	6	170142658	0.000743206	0.393736018	447	0.082200343	0.105997395	0.997234826
S5_215077231	5	220956646	0.000751633	0.441834452	447	0.082200343	0.105953034	0.997234826
S4_136976819	4	140081574	0.000752867	0.457494407	447	0.082200343	0.105946577	0.997234826
S7_153452359	7	158782730	0.000753879	0.359060403	447	0.082200343	0.105941297	0.997234826
S2_109000231	2	112116007	0.000754776	0.100671141	447	0.082200343	0.105936617	0.997234826
S3_5578721	3	4744375	0.000754823	0.492170022	447	0.082200343	0.10593637	0.997234826
S5_194560178	5	199881659	0.000755741	0.163310962	447	0.082200343	0.10593159	0.997234826
S5_194560179	5	199881660	0.000755741	0.163310962	447	0.082200343	0.10593159	0.997234826
S8_114742453	8	117495523	0.000763611	0.441834452	447	0.082200343	0.10589084	0.997234826
S8_114742469	8	117495539	0.000763611	0.441834452	447	0.082200343	0.10589084	0.997234826
S6_27108515	6	28512414	0.000764135	0.174496644	447	0.082200343	0.105888138	0.997234826
S5_214612573	5	220484935	0.000766714	0.337807606	447	0.082200343	0.105874889	0.997234826
S5_213945112	5	219814347	0.000778142	0.154362416	447	0.082200343	0.105816703	0.997234826
S9_153524971	9	156686211	0.000782132	0.498881432	447	0.082200343	0.105796592	0.997234826
S2_159694952	2	164337264	0.000782574	0.408277405	447	0.082200343	0.105794371	0.997234826
S8_92276292	8	94061729	0.000795121	0.475391499	447	0.082200343	0.105731834	0.997234826
S5_191795027	5	197165288	0.000804913	0.348993289	447	0.082200343	0.105683721	0.997234826
S5_191795033	5	197165294	0.000804913	0.348993289	447	0.082200343	0.105683721	0.997234826
S4_155805286	4	159323013	0.000807282	0.148769575	447	0.082200343	0.105672175	0.997234826
S2_4162842	2	4126556	0.000808298	0.412751678	447	0.082200343	0.105667231	0.997234826
S3_187023958	3	189963027	0.00081017	0.407158837	447	0.082200343	0.105658136	0.997234826
S1_206432668	1	209259496	0.000811351	0.472035794	447	0.082200343	0.105652415	0.997234826
S2_84643032	2	86928589	0.000825545	0.217002237	447	0.082200343	0.105584267	0.997234826
S3_28224267	3	27844500	0.000836864	0.42393736	447	0.082200343	0.105530767	0.997234826
S1_224370134	1	227988149	0.00084863	0.357941834	447	0.082200343	0.10547593	0.997234826
S4_185181544	4	188624440	0.000850847	0.149888143	447	0.082200343	0.105465684	0.997234826
S8_163913159	8	168893234	0.000858881	0.325503356	447	0.082200343	0.105428778	0.997234826
S5_16844901	5	17460519	0.000859064	0.460850112	447	0.082200343	0.105427945	0.997234826
S6_105598639	6	108965441	0.000862392	0.345637584	447	0.082200343	0.105412762	0.997234826
S10_80616298	10	80033655	0.000868689	0.43064877	447	0.082200343	0.105384199	0.997234826
S4_13796965	4	14602079	0.000895122	0.262863535	447	0.082200343	0.105266548	0.997234826
S3_224567900	3	228321686	0.000899825	0.134228188	447	0.082200343	0.105245985	0.997234826
S5_6113562	5	6349436	0.000902414	0.466442953	447	0.082200343	0.105234711	0.997234826
S6_93337473	6	95997124	0.000913023	0.326621924	447	0.082200343	0.105188858	0.997234826
S8_129505846	8	133395777	0.000918164	0.43064877	447	0.082200343	0.105166828	0.997234826
S8_173409805	8	178703010	0.000921227	0.435123043	447	0.082200343	0.105153766	0.997234826
S2_109854546	2	112989006	0.000925531	0.136465324	447	0.082200343	0.105135485	0.997234826
S4_18695368	4	19877450	0.000927551	0.187919463	447	0.082200343	0.105126934	0.997234826
S4_18695392	4	19877474	0.000929107	0.195749441	447	0.082200343	0.105120357	0.997234826
S3_215475112	3	219083877	0.000935567	0.317673378	447	0.082200343	0.105093185	0.997234826
S3_148281418	3	149596231	0.00094118	0.322147651	447	0.082200343	0.105069729	0.997234826
S7_130882940	7	134905291	0.000943319	0.296420582	447	0.082200343	0.105060827	0.997234826
S3_215475009	3	219083774	0.000948548	0.310961969	447	0.082200343	0.105039156	0.997234826
S6_93337476	6	95997127	0.000953738	0.326621924	447	0.082200343	0.105017764	0.997234826
S5_194560177	5	199881658	0.00096721	0.162192394	447	0.082200343	0.104962779	0.997234826
S5_191129122	5	196487436	0.000972855	0.459731544	447	0.082200343	0.104939972	0.997234826
S7_133365264	7	137477853	0.000976052	0.229306488	447	0.082200343	0.104927111	0.997234826
S1_248595048	1	252527916	0.000987641	0.368008949	447	0.082200343	0.104880861	0.997234826
S10_147141046	10	147943012	0.000999556	0.361297539	447	0.082200343	0.104833877	0.997234826
S2_214000614	2	220805149	0.001000934	0.363534676	447	0.082200343	0.104828481	0.997234826
S7_132185037	7	136266461	0.001003319	0.155480984	447	0.082200343	0.104819158	0.997234826
S7_132185067	7	136266491	0.001003319	0.155480984	447	0.082200343	0.104819158	0.997234826
S7_132185077	7	136266501	0.001003319	0.155480984	447	0.082200343	0.104819158	0.997234826
S9_26613240	9	26667588	0.001003735	0.140939597	447	0.082200343	0.104817531	0.997234826
S1_9305075	1	9351425	0.001009624	0.043624161	447	0.082200343	0.104794617	0.997234826
S2_120284014	2	124266425	0.001012778	0.325503356	447	0.082200343	0.1047824	0.997234826
S9_152528904	9	155674177	0.001022474	0.134228188	447	0.082200343	0.104745084	0.997234826
S1_9216858	1	9257513	0.001056436	0.460850112	447	0.082200343	0.104617153	0.997234826
S8_173608554	8	178835389	0.001062562	0.441834452	447	0.082200343	0.104594524	0.997234826
S7_153654562	7	158943632	0.00107132	0.35458613	447	0.082200343	0.104562397	0.997234826
S3_3836030	3	3092853	0.001076956	0.382550336	447	0.082200343	0.104541867	0.997234826
S8_142004860	8	146189681	0.00107702	0.196868009	447	0.082200343	0.104541633	0.997234826
S8_18612545	8	19243413	0.001078624	0.081655481	447	0.082200343	0.10453581	0.997234826
S10_108124607	10	108843127	0.001085552	0.450782998	447	0.082200343	0.104510761	0.997234826
S4_222030904	4	226369786	0.001085658	0.250559284	447	0.082200343	0.104510377	0.997234826
S2_84688539	2	86974091	0.001100262	0.192393736	447	0.082200343	0.104458103	0.997234826
S5_44720719	5	46045823	0.001108531	0.184563758	447	0.082200343	0.104428817	0.997234826
S5_194111271	5	199537760	0.001110904	0.458612975	447	0.082200343	0.104420453	0.997234826
S5_175588288	5	179611723	0.001113747	0.131991051	447	0.082200343	0.104410457	0.997234826
S9_100992284	9	104448141	0.001114469	0.464205817	447	0.082200343	0.104407925	0.997234826
S8_26863265	8	27716319	0.001121896	0.454138702	447	0.082200343	0.104381948	0.997234826
S8_173340272	8	178636318	0.001138868	0.322147651	447	0.082200343	0.104323242	0.997234826
S4_36305825	4	37965139	0.001139229	0.394854586	447	0.082200343	0.104322002	0.997234826
S2_109576038	2	112707454	0.00116576	0.388143177	447	0.082200343	0.104232016	0.997234826
S1_9305070	1	9351420	0.001186304	0.044742729	447	0.082200343	0.104163752	0.997234826
S5_68651708	5	70577797	0.001186747	0.149888143	447	0.082200343	0.104162293	0.997234826
S9_153775211	9	156921495	0.001196324	0.33557047	447	0.082200343	0.104130893	0.997234826
S1_198195179	1	200650037	0.0011967	0.181208054	447	0.082200343	0.104129665	0.997234826
S5_213945004	5	219814239	0.001197042	0.136465324	447	0.082200343	0.10412855	0.997234826
S3_154648606	3	156116238	0.001213374	0.298657718	447	0.082200343	0.104075618	0.997234826
S7_129964003	7	133998869	0.00122335	0.294183445	447	0.082200343	0.10404364	0.997234826
S4_157118442	4	160597288	0.001224037	0.406040268	447	0.082200343	0.104041449	0.997234826
S5_7152892	5	7407964	0.001224355	0.466442953	447	0.082200343	0.104040436	0.997234826
S5_7152905	5	7407977	0.001224355	0.466442953	447	0.082200343	0.104040436	0.997234826
S4_18586497	4	19768781	0.001233809	0.421700224	447	0.082200343	0.1040104	0.997234826
S6_147902369	6	151977069	0.001236584	0.17114094	447	0.082200343	0.104001627	0.997234826
S1_258651831	1	263291478	0.001241702	0.389261745	447	0.082200343	0.103985503	0.997234826
S5_56371009	5	58172961	0.001241932	0.479865772	447	0.082200343	0.103984778	0.997234826
S9_140353825	9	143024623	0.001249596	0.068232662	447	0.082200343	0.10396076	0.997234826
S7_155258548	7	160633176	0.001250526	0.44295302	447	0.082200343	0.103957858	0.997234826
S6_163174810	6	167398614	0.001258845	0.402684564	447	0.082200343	0.103931975	0.997234826
S1_33120386	1	33450114	0.001264444	0.36689038	447	0.082200343	0.103914654	0.997234826
S5_130048697	5	133502895	0.001267994	0.162192394	447	0.082200343	0.103903711	0.997234826
S5_215661090	5	221524588	0.001280163	0.387024609	447	0.082200343	0.103866439	0.997234826
S4_238122769	4	243422907	0.001283611	0.135346756	447	0.082200343	0.103855941	0.997234826
S10_33744194	10	34693515	0.001292504	0.312080537	447	0.082200343	0.103829004	0.997234826
S3_12529632	3	11809361	0.001293084	0.217002237	447	0.082200343	0.103827251	0.997234826
S10_80616329	10	80033686	0.001293609	0.432885906	447	0.082200343	0.10382567	0.997234826
S9_154081662	9	157229214	0.001293934	0.390380313	447	0.082200343	0.10382469	0.997234826
S8_165858697	8	171067533	0.001296798	0.382550336	447	0.082200343	0.103816062	0.997234826
S2_4302717	2	4280502	0.001303209	0.238255034	447	0.082200343	0.103796823	0.997234826
S3_6931157	3	6099319	0.001306706	0.331096197	447	0.082200343	0.10378637	0.997234826
S8_165858701	8	171067537	0.001310624	0.376957494	447	0.082200343	0.103774693	0.997234826
S1_36915760	1	37283339	0.001314384	0.429530201	447	0.082200343	0.103763517	0.997234826
S4_204377337	4	208900481	0.001321682	0.070469799	447	0.082200343	0.103741922	0.997234826
S5_129559919	5	132989507	0.001333262	0.448545861	447	0.082200343	0.1037079	0.997234826
S5_129559964	5	132989552	0.001333262	0.448545861	447	0.082200343	0.1037079	0.997234826
S9_88736168	9	92071755	0.001340277	0.426174497	447	0.082200343	0.103687439	0.997234826
S10_141349096	10	142132498	0.001342039	0.336689038	447	0.082200343	0.103682314	0.997234826
S7_130878078	7	134900429	0.00134308	0.242729306	447	0.082200343	0.103679293	0.997234826
S6_45216982	6	46948553	0.001360288	0.460850112	447	0.082200343	0.103629658	0.997234826
S5_6113463	5	6349337	0.001370999	0.465324385	447	0.082200343	0.103599083	0.997234826
S5_6113509	5	6349383	0.001370999	0.465324385	447	0.082200343	0.103599083	0.997234826
S8_35838126	8	36840816	0.001373579	0.331096197	447	0.082200343	0.103591757	0.997234826
S6_163174808	6	167398612	0.001375492	0.400447427	447	0.082200343	0.10358633	0.997234826
S5_131363460	5	134676232	0.001382884	0.236017897	447	0.082200343	0.103565441	0.997234826
S1_229094039	1	232587555	0.001385235	0.323266219	447	0.082200343	0.103558821	0.997234826
S2_18112313	2	19321413	0.001387306	0.244966443	447	0.082200343	0.103552999	0.997234826
S2_120283792	2	124266203	0.001391062	0.31655481	447	0.082200343	0.103542463	0.997234826
S10_38161990	10	39330599	0.001409735	0.412751678	447	0.082200343	0.103490507	0.997234826
S1_7198181	1	7182976	0.001412283	0.086129754	447	0.082200343	0.103483473	0.997234826
S1_158475200	1	159880784	0.00141354	0.353467562	447	0.082200343	0.103480006	0.997234826
S8_141949130	8	146129799	0.00142593	0.282997763	447	0.082200343	0.10344601	0.997234826
S7_76276243	7	78829932	0.001431817	0.097315436	447	0.082200343	0.103429962	0.997234826
S3_148563884	3	149873544	0.001446302	0.310961969	447	0.082200343	0.10339076	0.997234826
S7_38659707	7	40008552	0.001455135	0.258389262	447	0.082200343	0.103367049	0.997234826
S8_24869193	8	25663824	0.001455519	0.381431767	447	0.082200343	0.10336602	0.997234826
S1_137851798	1	140061019	0.001457477	0.46196868	447	0.082200343	0.103360787	0.997234826
S3_173208629	3	175642639	0.001459875	0.406040268	447	0.082200343	0.103354384	0.997234826
S9_155453063	9	158533734	0.001472343	0.455257271	447	0.082200343	0.103321275	0.997234826
S10_146994430	10	147797733	0.001474629	0.477628635	447	0.082200343	0.103315233	0.997234826
S8_168286788	8	173535797	0.001475017	0.475391499	447	0.082200343	0.103314211	0.997234826
S1_243024694	1	246678839	0.00148399	0.458612975	447	0.082200343	0.1032906	0.997234826
S2_2033429	2	2030468	0.001491564	0.130872483	447	0.082200343	0.103270784	0.997234826
S10_76948270	10	76303776	0.001491732	0.420581655	447	0.082200343	0.103270344	0.997234826
S8_7675592	8	8015972	0.001493724	0.055928412	447	0.082200343	0.103265152	0.997234826
S6_107178172	6	111833882	0.001513001	0.106263982	447	0.082200343	0.103215248	0.997234826
S5_130956665	5	134452406	0.001513045	0.338926174	447	0.082200343	0.103215134	0.997234826
S8_114427153	8	117173419	0.001516691	0.343400447	447	0.082200343	0.103205769	0.997234826
S1_5517213	1	5589405	0.001517167	0.336689038	447	0.082200343	0.103204547	0.997234826
S7_2914579	7	3035593	0.001526395	0.422818792	447	0.082200343	0.103180952	0.997234826
S8_165858705	8	171067541	0.001536741	0.380313199	447	0.082200343	0.103154671	0.997234826
S8_165858716	8	171067552	0.001536741	0.380313199	447	0.082200343	0.103154671	0.997234826
S2_18118924	2	19328024	0.001541934	0.389261745	447	0.082200343	0.103141548	0.997234826
S5_44985543	5	46337550	0.001545867	0.181208054	447	0.082200343	0.103131638	0.997234826
S5_925518	5	961770	0.001546154	0.460850112	447	0.082200343	0.103130915	0.997234826
S8_165875853	8	171086044	0.001547021	0.420581655	447	0.082200343	0.103128735	0.997234826
S5_5347197	5	5474469	0.001563406	0.431767338	447	0.082200343	0.103087756	0.997234826
S6_27112567	6	28516466	0.001573459	0.27852349	447	0.082200343	0.103062827	0.997234826
S2_84678389	2	86963941	0.00157487	0.197986577	447	0.082200343	0.103059342	0.997234826
S10_122816647	10	123911791	0.001580698	0.063758389	447	0.082200343	0.103044979	0.997234826
S8_129497397	8	133387324	0.001585387	0.327740492	447	0.082200343	0.103033461	0.997234826
S8_129497406	8	133387333	0.001585387	0.327740492	447	0.082200343	0.103033461	0.997234826
S8_129497407	8	133387334	0.001585387	0.327740492	447	0.082200343	0.103033461	0.997234826
S3_221440264	3	225202714	0.001592262	0.215883669	447	0.082200343	0.103016636	0.997234826
S5_3641305	5	3734587	0.001593218	0.351230425	447	0.082200343	0.103014303	0.997234826
S3_148539785	3	149849452	0.001613714	0.341163311	447	0.082200343	0.10296461	0.997234826
S6_167958082	6	172185924	0.001620737	0.482102908	447	0.082200343	0.10294773	0.997234826
S3_215475025	3	219083790	0.001622996	0.483221477	447	0.082200343	0.102942316	0.997234826
S3_215475039	3	219083804	0.001622996	0.483221477	447	0.082200343	0.102942316	0.997234826
S4_201122798	4	205516162	0.001623255	0.34787472	447	0.082200343	0.102941696	0.997234826
S4_152566663	4	156126412	0.001638485	0.11409396	447	0.082200343	0.102905402	0.997234826
S2_111315064	2	114558285	0.001655036	0.233780761	447	0.082200343	0.102866346	0.997234826
S1_198653504	1	201109321	0.001661361	0.089485459	447	0.082200343	0.102851527	0.997234826
S7_133370883	7	137483472	0.001667554	0.395973154	447	0.082200343	0.102837072	0.997234826
S7_160558068	7	166043834	0.001667557	0.124161074	447	0.082200343	0.102837063	0.997234826
S4_72579072	4	75299309	0.001674961	0.464205817	447	0.082200343	0.102819854	0.997234826
S2_168919093	2	173739015	0.001678931	0.474272931	447	0.082200343	0.102810657	0.997234826
S8_165263606	8	170449385	0.001680554	0.397091723	447	0.082200343	0.102806905	0.997234826
S2_18120602	2	19329702	0.00168481	0.394854586	447	0.082200343	0.102797079	0.997234826
S3_5578685	3	4744339	0.001686084	0.413870246	447	0.082200343	0.102794145	0.997234826
S7_112945678	7	116233132	0.001687861	0.15212528	447	0.082200343	0.102790052	0.997234826
S7_112945682	7	116233136	0.001687861	0.15212528	447	0.082200343	0.102790052	0.997234826
S8_114742465	8	117495535	0.001691871	0.318791946	447	0.082200343	0.102780836	0.997234826
S7_75982330	7	78534813	0.001701682	0.147651007	447	0.082200343	0.10275838	0.997234826
S3_201560633	3	204747297	0.001703982	0.102908277	447	0.082200343	0.102753133	0.997234826
S1_248855994	1	252791338	0.001708021	0.218120805	447	0.082200343	0.10274394	0.997234826
S5_205041137	5	210674659	0.001708609	0.073825503	447	0.082200343	0.102742602	0.997234826
S8_162846078	8	167852494	0.001710104	0.390380313	447	0.082200343	0.102739206	0.997234826
S1_248615581	1	252548446	0.001711866	0.158836689	447	0.082200343	0.102735208	0.997234826
S1_9217134	1	9257789	0.001720569	0.450782998	447	0.082200343	0.102715516	0.997234826
S4_56308018	4	58642491	0.001727474	0.388143177	447	0.082200343	0.102699967	0.997234826
S3_221440262	3	225202712	0.001727735	0.215883669	447	0.082200343	0.102699379	0.997234826
S8_128343664	8	132229090	0.001737242	0.201342282	447	0.082200343	0.102678075	0.997234826
S1_100903382	1	103279997	0.001751202	0.298657718	447	0.082200343	0.102647006	0.997234826
S5_203646414	5	209091028	0.001755321	0.168903803	447	0.082200343	0.102637886	0.997234826
S8_25008397	8	25813477	0.001755324	0.387024609	447	0.082200343	0.102637879	0.997234826
S1_158630886	1	160030118	0.001764471	0.086129754	447	0.082200343	0.102617707	0.997234826
S1_16439901	1	16813999	0.001767166	0.100671141	447	0.082200343	0.102611783	0.997234826
S3_9452136	3	8727444	0.001769351	0.32885906	447	0.082200343	0.102606986	0.997234826
S10_146164618	10	146938888	0.001770039	0.37360179	447	0.082200343	0.102605479	0.997234826
S4_215630241	4	219736796	0.001782259	0.361297539	447	0.082200343	0.102578778	0.997234826
S8_24869192	8	25663823	0.001785563	0.382550336	447	0.082200343	0.102571591	0.997234826
S10_33744224	10	34693545	0.001785714	0.310961969	447	0.082200343	0.102571264	0.997234826
S2_2061275	2	2058314	0.001804978	0.294183445	447	0.082200343	0.102529631	0.997234826
S1_265891693	1	270704492	0.001819352	0.201342282	447	0.082200343	0.102498861	0.997234826
S9_113423956	9	116758534	0.001823679	0.436241611	447	0.082200343	0.102489646	0.997234826
S5_130956667	5	134452408	0.001825284	0.343400447	447	0.082200343	0.102486235	0.997234826
S2_45204257	2	47117361	0.001847964	0.242729306	447	0.082200343	0.102438341	0.997234826
S1_263487364	1	268355219	0.001848897	0.473154362	447	0.082200343	0.102436382	0.997234826
S3_215475043	3	219083808	0.001865246	0.313199105	447	0.082200343	0.102402245	0.997234826
S2_12105214	2	12409083	0.001874036	0.232662192	447	0.082200343	0.102384016	0.997234826
S2_12105215	2	12409084	0.001874036	0.232662192	447	0.082200343	0.102384016	0.997234826
S1_269306938	1	274063746	0.001875064	0.394854586	447	0.082200343	0.102381891	0.997234826
S9_101099730	9	104547072	0.001878201	0.469798658	447	0.082200343	0.10237541	0.997234826
S2_110086500	2	113249236	0.001883097	0.408277405	447	0.082200343	0.102365317	0.997234826
S2_108956746	2	112072825	0.00188407	0.161073826	447	0.082200343	0.102363314	0.997234826
S1_258883548	1	263525252	0.001884733	0.453020134	447	0.082200343	0.10236195	0.997234826
S5_130950983	5	134446724	0.001887127	0.383668904	447	0.082200343	0.10235703	0.997234826
S7_112945680	7	116233134	0.001887405	0.153243848	447	0.082200343	0.10235646	0.997234826
S8_106234920	8	108569291	0.001892926	0.398210291	447	0.082200343	0.102345137	0.997234826
S8_106234921	8	108569292	0.001892926	0.398210291	447	0.082200343	0.102345137	0.997234826
S4_18809292	4	19991998	0.001912334	0.414988814	447	0.082200343	0.102305598	0.997234826
S3_173472590	3	175917242	0.001918077	0.342281879	447	0.082200343	0.102293978	0.997234826
S5_68512450	5	70444292	0.001928012	0.238255034	447	0.082200343	0.102273957	0.997234826
S3_224539429	3	228294219	0.001938606	0.063758389	447	0.082200343	0.102252724	0.997234826
S8_129501472	8	133391399	0.001939458	0.343400447	447	0.082200343	0.102251021	0.997234826
S7_38659548	7	40008393	0.001941051	0.25950783	447	0.082200343	0.10224784	0.997234826
S5_78427134	5	80722029	0.001941321	0.477628635	447	0.082200343	0.1022473	0.997234826
S1_33890385	1	34223503	0.001947571	0.418344519	447	0.082200343	0.102234848	0.997234826
S2_108956777	2	112072856	0.001953798	0.162192394	447	0.082200343	0.10222248	0.997234826
S1_194660964	1	197049963	0.001961017	0.390380313	447	0.082200343	0.102208191	0.997234826
S8_141949129	8	146129798	0.001964456	0.4049217	447	0.082200343	0.102201405	0.997234826
S3_184672762	3	187677777	0.001966498	0.317673378	447	0.082200343	0.10219738	0.997234826
S9_101199038	9	104672946	0.001971978	0.124161074	447	0.082200343	0.1021866	0.997234826
S7_155701159	7	161065641	0.001983581	0.400447427	447	0.082200343	0.102163876	0.997234826
S5_892687	5	928939	0.001990711	0.364653244	447	0.082200343	0.102149981	0.997234826
S5_75800832	5	78057940	0.001995056	0.35458613	447	0.082200343	0.102141538	0.997234826
S2_15898319	2	16320007	0.00199678	0.390380313	447	0.082200343	0.102138192	0.997234826
S1_194660941	1	197049940	0.001998143	0.38590604	447	0.082200343	0.10213555	0.997234826
S3_168373102	3	170943188	0.0020001	0.068232662	447	0.082200343	0.102131758	0.997234826
S9_101199034	9	104672942	0.002000165	0.12639821	447	0.082200343	0.102131633	0.997234826
S1_158475346	1	159880930	0.002004321	0.336689038	447	0.082200343	0.102123594	0.997234826
S2_54087753	2	56141435	0.002011725	0.211409396	447	0.082200343	0.102109316	0.997234826
S7_15332416	7	15824741	0.0020125	0.201342282	447	0.082200343	0.102107825	0.997234826
S3_184676330	3	187681345	0.002013584	0.350111857	447	0.082200343	0.102105741	0.997234826
S1_91187988	1	93133874	0.002014356	0.376957494	447	0.082200343	0.102104257	0.997234826
S2_3875191	2	3892114	0.002015624	0.268456376	447	0.082200343	0.10210182	0.997234826
S8_12903759	8	13255745	0.002018343	0.453020134	447	0.082200343	0.102096601	0.997234826
S3_30995914	3	30592605	0.002020432	0.06935123	447	0.082200343	0.102092595	0.997234826
S7_132077802	7	136128956	0.002022326	0.174496644	447	0.082200343	0.102088967	0.997234826
S1_273299112	1	278099417	0.002035625	0.296420582	447	0.082200343	0.102063592	0.997234826
S5_191795025	5	197165286	0.00203982	0.352348993	447	0.082200343	0.102055622	0.997234826
S10_3993533	10	3601004	0.002039885	0.298657718	447	0.082200343	0.102055497	0.997234826
S1_3280100	1	3378941	0.002040217	0.351230425	447	0.082200343	0.102054868	0.997234826
S8_114427129	8	117173395	0.00204743	0.342281879	447	0.082200343	0.102041207	0.997234826
S7_155026146	7	160353375	0.002051193	0.352348993	447	0.082200343	0.1020341	0.997234826
S1_173237813	1	175174711	0.002051898	0.439597315	447	0.082200343	0.102032769	0.997234826
S5_45539066	5	46914249	0.002052603	0.158836689	447	0.082200343	0.10203144	0.997234826
S3_220681900	3	224392054	0.002053834	0.472035794	447	0.082200343	0.102029119	0.997234826
S5_203646413	5	209091027	0.002056832	0.17114094	447	0.082200343	0.102023472	0.997234826
S3_184196531	3	187173500	0.002064182	0.387024609	447	0.082200343	0.102009667	0.997234826
S3_149313960	3	150587243	0.002068466	0.308724832	447	0.082200343	0.102001643	0.997234826
S2_54087605	2	56141287	0.002084018	0.450782998	447	0.082200343	0.101972656	0.997234826
S6_1994553	6	1978412	0.002093198	0.098434004	447	0.082200343	0.101955648	0.997234826
S7_155354452	7	160749840	0.002094373	0.400447427	447	0.082200343	0.101953477	0.997234826
S5_1525669	5	1566061	0.00210044	0.257270694	447	0.082200343	0.101942285	0.997234826
S2_236440433	2	240639720	0.002101437	0.151006711	447	0.082200343	0.101940448	0.997234826
S10_142403195	10	143202839	0.002112711	0.472035794	447	0.082200343	0.101919748	0.997234826
S2_84450499	2	86727208	0.002117674	0.224832215	447	0.082200343	0.101910671	0.997234826
S1_173217107	1	175154007	0.002118668	0.239373602	447	0.082200343	0.101908855	0.997234826
S5_68510993	5	70442835	0.002123944	0.376957494	447	0.082200343	0.101899234	0.997234826
S8_155931928	8	160707203	0.002128556	0.086129754	447	0.082200343	0.101890844	0.997234826
S5_168182170	5	172139853	0.00214276	0.363534676	447	0.082200343	0.101865119	0.997234826
S1_281071242	1	286172956	0.002143548	0.318791946	447	0.082200343	0.101863697	0.997234826
S9_101199031	9	104672939	0.002146174	0.124161074	447	0.082200343	0.101858961	0.997234826
S9_101199035	9	104672943	0.002146174	0.124161074	447	0.082200343	0.101858961	0.997234826
S9_101199026	9	104672934	0.002146174	0.124161074	447	0.082200343	0.101858961	0.997234826
S2_104966072	2	107913675	0.002152377	0.380313199	447	0.082200343	0.1018478	0.997234826
S1_105462237	1	107995345	0.00215373	0.464205817	447	0.082200343	0.101845369	0.997234826
S5_82953676	5	85120445	0.002159522	0.280760626	447	0.082200343	0.101834983	0.997234826
S6_147539660	6	151596249	0.002159596	0.394854586	447	0.082200343	0.10183485	0.997234826
S5_203106314	5	208536562	0.002164659	0.228187919	447	0.082200343	0.101825796	0.997234826
S2_130952641	2	135110276	0.002167804	0.234899329	447	0.082200343	0.101820181	0.997234826
S9_1077415	9	742364	0.002172036	0.486577181	447	0.082200343	0.101812639	0.997234826
S2_236298545	2	244366272	0.002194551	0.4049217	447	0.082200343	0.101772768	0.997234826
S3_148556920	3	149866582	0.002196936	0.257270694	447	0.082200343	0.10176857	0.997234826
S3_55029455	3	54949959	0.002205954	0.382550336	447	0.082200343	0.101752733	0.997234826
S8_132047453	8	136012872	0.002207409	0.455257271	447	0.082200343	0.101750184	0.997234826
S7_131031850	7	135062201	0.002208324	0.236017897	447	0.082200343	0.101748582	0.997234826
S3_12526508	3	11806237	0.002208961	0.072706935	447	0.082200343	0.101747469	0.997234826
S3_173513553	3	175957876	0.002211047	0.276286353	447	0.082200343	0.101743819	0.997234826
S7_99538643	7	102654563	0.00221398	0.228187919	447	0.082200343	0.101738695	0.997234826
S1_158475349	1	159880933	0.002220905	0.33557047	447	0.082200343	0.101726624	0.997234826
S7_76267276	7	78820968	0.002232725	0.134228188	447	0.082200343	0.101706109	0.997234826
S5_16321052	5	16901822	0.002246538	0.137583893	447	0.082200343	0.101682274	0.997234826
S3_48807416	3	48601358	0.002252778	0.48098434	447	0.082200343	0.101671557	0.997234826
S5_45438647	5	46815518	0.002258379	0.156599553	447	0.082200343	0.101661961	0.997234826
S4_152566670	4	156126419	0.002262788	0.214765101	447	0.082200343	0.101654426	0.997234826
S4_192791712	4	197112888	0.002263758	0.13310962	447	0.082200343	0.10165277	0.997234826
S5_175608804	5	179634852	0.002268942	0.3098434	447	0.082200343	0.101643932	0.997234826
S7_129971230	7	134006096	0.002269902	0.437360179	447	0.082200343	0.101642298	0.997234826
S1_9811059	1	9885215	0.002275079	0.104026846	447	0.082200343	0.101633495	0.997234826
S7_38659555	7	40008400	0.002302761	0.4049217	447	0.082200343	0.101586777	0.997234826
S8_165858704	8	171067540	0.002302874	0.31655481	447	0.082200343	0.101586588	0.997234826
S8_165858717	8	171067553	0.002302874	0.31655481	447	0.082200343	0.101586588	0.997234826
S7_133373985	7	137486574	0.002307443	0.299776286	447	0.082200343	0.101578932	0.997234826
S1_273100855	1	277891712	0.002308364	0.376957494	447	0.082200343	0.10157739	0.997234826
S10_4098823	10	3801054	0.002309902	0.279642058	447	0.082200343	0.101574818	0.997234826
S5_45748448	5	47128340	0.002318299	0.422818792	447	0.082200343	0.101560803	0.997234826
S5_69098216	5	71064586	0.002325716	0.085011186	447	0.082200343	0.101548468	0.997234826
S2_43353074	2	45216380	0.002326377	0.470917226	447	0.082200343	0.101547371	0.997234826
S2_195037419	2	201256601	0.002335985	0.438478747	447	0.082200343	0.101531455	0.997234826
S7_99384184	7	102492778	0.002336444	0.427293065	447	0.082200343	0.101530696	0.997234826
S7_155340611	7	160735999	0.002340211	0.374720358	447	0.082200343	0.101524476	0.997234826
S5_195627553	5	200822072	0.002343356	0.118568233	447	0.082200343	0.101519289	0.997234826
S1_208827289	1	211803322	0.002353145	0.097315436	447	0.082200343	0.101503194	0.997234826
S7_152175572	7	157523540	0.002354293	0.408277405	447	0.082200343	0.101501311	0.997234826
S2_84677652	2	86963204	0.002356165	0.1901566	447	0.082200343	0.101498242	0.997234826
S7_15332360	7	15824685	0.002356233	0.402684564	447	0.082200343	0.101498131	0.997234826
S2_109854536	2	112988996	0.002359931	0.148769575	447	0.082200343	0.101492076	0.997234826
S5_194044845	5	199471633	0.002365629	0.071588367	447	0.082200343	0.101482766	0.997234826
S8_163909545	8	168889620	0.002368086	0.348993289	447	0.082200343	0.101478759	0.997234826
S2_108640812	2	111732495	0.002374791	0.082774049	447	0.082200343	0.101467843	0.997234826
S4_61413721	4	63837444	0.002376597	0.142058166	447	0.082200343	0.10146491	0.997234826
S6_20968315	6	19238954	0.002382035	0.111856823	447	0.082200343	0.101456086	0.997234826
S2_12105213	2	12409082	0.002395927	0.233780761	447	0.082200343	0.10143364	0.997234826
S3_9111554	3	8333685	0.002408206	0.260626398	447	0.082200343	0.101413912	0.997234826
S8_24767173	8	25560615	0.002426395	0.406040268	447	0.082200343	0.101384874	0.997234826
S8_14837811	8	15273959	0.002429812	0.096196868	447	0.082200343	0.101379444	0.997234826
S4_13815075	4	14627291	0.002430443	0.38590604	447	0.082200343	0.101378443	0.997234826
S6_158281768	6	162456786	0.00244686	0.469798658	447	0.082200343	0.101352469	0.997234826
S8_106234922	8	108569293	0.002452692	0.399328859	447	0.082200343	0.101343284	0.997234826
S2_110155683	2	113302702	0.002453013	0.467561521	447	0.082200343	0.101342779	0.997234826
S3_6926173	3	6094335	0.002455763	0.233780761	447	0.082200343	0.101338456	0.997234826
S3_6926202	3	6094364	0.002455763	0.233780761	447	0.082200343	0.101338456	0.997234826
S8_165350759	8	170534454	0.002456436	0.070469799	447	0.082200343	0.101337399	0.997234826
S2_84654167	2	86939724	0.002474232	0.201342282	447	0.082200343	0.101309554	0.997234826
S2_84627375	2	86912569	0.002476917	0.181208054	447	0.082200343	0.101305369	0.997234826
S1_295438478	1	300942400	0.002480281	0.472035794	447	0.082200343	0.101300134	0.997234826
S7_130093167	7	134113134	0.002480807	0.14541387	447	0.082200343	0.101299316	0.997234826
S5_44720218	5	46045322	0.002485372	0.175615213	447	0.082200343	0.101292226	0.997234826
S5_213945087	5	219814322	0.00248981	0.192393736	447	0.082200343	0.101285345	0.997234826
S2_131139889	2	135297149	0.002490606	0.407158837	447	0.082200343	0.101284112	0.997234826
S5_6140644	5	6405487	0.00249454	0.437360179	447	0.082200343	0.101278025	0.997234826
S2_222162699	2	229147302	0.002497078	0.323266219	447	0.082200343	0.101274103	0.997234826
S8_161915106	8	166916624	0.002498416	0.154362416	447	0.082200343	0.101272037	0.997234826
S3_19250365	3	18639926	0.0025102	0.129753915	447	0.082200343	0.10125389	0.997234826
S2_236421669	2	240620956	0.002519703	0.093959732	447	0.082200343	0.10123932	0.997234826
S5_200292465	5	205734883	0.002528747	0.345637584	447	0.082200343	0.101225505	0.997234826
S3_2144118	3	1467838	0.002535207	0.488814318	447	0.082200343	0.101215668	0.997234826
S2_117313214	2	121217202	0.002537805	0.447427293	447	0.082200343	0.10121172	0.997234826
S10_126446809	10	127481269	0.002538952	0.092841163	447	0.082200343	0.101209978	0.997234826
S1_279897797	1	285008748	0.002542027	0.427293065	447	0.082200343	0.10120531	0.997234826
S1_158475351	1	159880935	0.002543592	0.353467562	447	0.082200343	0.101202938	0.997234826
S1_158475352	1	159880936	0.002543592	0.353467562	447	0.082200343	0.101202938	0.997234826
S4_237146202	4	242400859	0.002551241	0.370246085	447	0.082200343	0.101191362	0.997234826
S2_179002955	2	184452655	0.002551294	0.468680089	447	0.082200343	0.101191281	0.997234826
S2_179002960	2	184452660	0.002551294	0.468680089	447	0.082200343	0.101191281	0.997234826
S2_179002961	2	184452661	0.002551294	0.468680089	447	0.082200343	0.101191281	0.997234826
S2_15024017	2	15449527	0.002552617	0.468680089	447	0.082200343	0.101189284	0.997234826
S1_208316083	1	211270263	0.002555293	0.478747204	447	0.082200343	0.101185244	0.997234826
S9_128658933	9	130899461	0.00256114	0.07606264	447	0.082200343	0.101176434	0.997234826
S1_140985509	1	143231343	0.002564427	0.329977629	447	0.082200343	0.10117149	0.997234826
S1_208316063	1	211270243	0.002567321	0.361297539	447	0.082200343	0.101167142	0.997234826
S7_112971332	7	116258878	0.002570408	0.195749441	447	0.082200343	0.10116251	0.997234826
S1_2044261	1	2110807	0.002573099	0.363534676	447	0.082200343	0.101158478	0.997234826
S5_213945086	5	219814321	0.002576274	0.193512304	447	0.082200343	0.101153724	0.997234826
S4_23950384	4	25531028	0.002578098	0.379194631	447	0.082200343	0.101150997	0.997234826
S1_240114214	1	243637952	0.002579181	0.322147651	447	0.082200343	0.101149378	0.997234826
S1_240114223	1	243637961	0.002579181	0.322147651	447	0.082200343	0.101149378	0.997234826
S1_177877576	1	179889275	0.00258185	0.477628635	447	0.082200343	0.10114539	0.997234826
S3_31448958	3	31043208	0.002584705	0.46196868	447	0.082200343	0.101141131	0.997234826
S8_172811405	8	178112658	0.002594436	0.134228188	447	0.082200343	0.101126649	0.997234826
S9_133792753	9	136186664	0.002600951	0.156599553	447	0.082200343	0.101116984	0.997234826
S6_150888495	6	155010351	0.002603001	0.25950783	447	0.082200343	0.101113948	0.997234826
S5_6113645	5	6349519	0.002603046	0.436241611	447	0.082200343	0.101113881	0.997234826
S1_41429578	1	41794405	0.002603466	0.137583893	447	0.082200343	0.10111326	0.997234826
S1_273299045	1	278099350	0.002605515	0.399328859	447	0.082200343	0.101110228	0.997234826
S4_80074013	4	82930770	0.002606412	0.10738255	447	0.082200343	0.101108902	0.997234826
S2_130953543	2	135111180	0.002617815	0.203579418	447	0.082200343	0.10109208	0.997234826
S1_256661623	1	261227440	0.002620638	0.425055928	447	0.082200343	0.101087928	0.997234826
S5_195626225	5	200820744	0.002625367	0.429530201	447	0.082200343	0.101080981	0.997234826
S8_114019266	8	116799937	0.002630476	0.436241611	447	0.082200343	0.10107349	0.997234826
S1_223626469	1	227224355	0.002636308	0.376957494	447	0.082200343	0.101064958	0.997234826
S1_223626472	1	227224358	0.002636308	0.376957494	447	0.082200343	0.101064958	0.997234826
S1_43679305	1	43902155	0.002641773	0.492170022	447	0.082200343	0.101056981	0.997234826
S3_184274633	3	187250297	0.002645025	0.472035794	447	0.082200343	0.10105224	0.997234826
S1_258656339	1	263295986	0.002661529	0.365771812	447	0.082200343	0.101028279	0.997234826
S5_215064662	5	220944078	0.002664635	0.426174497	447	0.082200343	0.101023786	0.997234826
S8_165726532	8	170930011	0.002666706	0.4049217	447	0.082200343	0.101020794	0.997234826
S5_131363471	5	134676243	0.002669363	0.233780761	447	0.082200343	0.101016959	0.997234826
S5_131363492	5	134676264	0.002669363	0.233780761	447	0.082200343	0.101016959	0.997234826
S10_126585285	10	127610415	0.002670969	0.081655481	447	0.082200343	0.101014642	0.997234826
S1_16604915	1	16978470	0.002685273	0.128635347	447	0.082200343	0.100994072	0.997234826
S2_110056747	2	113166666	0.002691963	0.325503356	447	0.082200343	0.100984488	0.997234826
S2_14268790	2	14727074	0.002692396	0.460850112	447	0.082200343	0.100983868	0.997234826
S9_147736437	9	150754881	0.002696275	0.253914989	447	0.082200343	0.100978324	0.997234826
S3_23175597	3	22638857	0.002698654	0.469798658	447	0.082200343	0.100974928	0.997234826
S10_117829073	10	118896937	0.002712892	0.287472036	447	0.082200343	0.100954666	0.997234826
S9_101199027	9	104672935	0.002714386	0.125279642	447	0.082200343	0.100952546	0.997234826
S1_172120932	1	174044705	0.002721718	0.108501119	447	0.082200343	0.10094216	0.997234826
S5_3412203	5	3476297	0.002735036	0.35458613	447	0.082200343	0.100923367	0.997234826
S8_114742467	8	117495537	0.002738065	0.317673378	447	0.082200343	0.100919106	0.997234826
S2_104967704	2	107915307	0.002740046	0.420581655	447	0.082200343	0.10091632	0.997234826
S1_42516388	1	42785531	0.002744748	0.073825503	447	0.082200343	0.10090972	0.997234826
S1_279897806	1	285008757	0.002748391	0.43064877	447	0.082200343	0.100904615	0.997234826
S9_154403681	9	157573895	0.002749798	0.161073826	447	0.082200343	0.100902644	0.997234826
S9_94248070	9	97673568	0.002756462	0.211409396	447	0.082200343	0.100893326	0.997234826
S8_22979649	8	23707519	0.002771464	0.082774049	447	0.082200343	0.100872434	0.997234826
S1_3280246	1	3379087	0.002781894	0.317673378	447	0.082200343	0.100857978	0.997234826
S3_3525450	3	2758793	0.002788798	0.414988814	447	0.082200343	0.100848439	0.997234826
S9_143900285	9	146694524	0.002788963	0.0950783	447	0.082200343	0.100848211	0.997234826
S7_162074536	7	167549036	0.002791617	0.429530201	447	0.082200343	0.100844551	0.997234826
S8_161860316	8	166861841	0.002797688	0.054809843	447	0.082200343	0.100836191	0.997234826
S8_2315716	8	2455925	0.002799407	0.467561521	447	0.082200343	0.100833826	0.997234826
S2_7176569	2	7084844	0.002800821	0.270693512	447	0.082200343	0.100831884	0.997234826
S3_201560499	3	204747163	0.002809356	0.383668904	447	0.082200343	0.100820175	0.997234826
S8_173392840	8	178687009	0.002814969	0.394854586	447	0.082200343	0.100812495	0.997234826
S4_201122801	4	205516165	0.002819941	0.350111857	447	0.082200343	0.100805706	0.997234826
S4_201122804	4	205516168	0.002819941	0.350111857	447	0.082200343	0.100805706	0.997234826
S3_19083509	3	18465636	0.002833291	0.124161074	447	0.082200343	0.100787535	0.997234826
S1_158475348	1	159880932	0.002836084	0.352348993	447	0.082200343	0.100783744	0.997234826
S8_139630920	8	143825431	0.002839405	0.236017897	447	0.082200343	0.100779242	0.997234826
S7_109252317	7	112430897	0.002840108	0.319910515	447	0.082200343	0.100778289	0.997234826
S4_18695355	4	19877437	0.002848361	0.437360179	447	0.082200343	0.100767126	0.997234826
S4_18695369	4	19877451	0.002848361	0.437360179	447	0.082200343	0.100767126	0.997234826
S7_115193010	7	118597761	0.002860537	0.35458613	447	0.082200343	0.100750719	0.997234826
S6_162445701	6	166648684	0.00286223	0.35458613	447	0.082200343	0.100748442	0.997234826
S7_133381323	7	137494419	0.002863586	0.35458613	447	0.082200343	0.100746621	0.997234826
S1_78583212	1	80111855	0.002864639	0.219239374	447	0.082200343	0.100745206	0.997234826
S3_136333820	3	137017637	0.002869027	0.369127517	447	0.082200343	0.10073932	0.997234826
S6_152167791	6	156293194	0.002869329	0.477628635	447	0.082200343	0.100738915	0.997234826
S1_91187907	1	93133793	0.002877507	0.317673378	447	0.082200343	0.100727969	0.997234826
S1_183811521	1	185881185	0.002878962	0.210290828	447	0.082200343	0.100726024	0.997234826
S5_213028216	5	218861575	0.002890085	0.265100671	447	0.082200343	0.100711193	0.997234826
S7_49585533	7	51170799	0.002892884	0.154362416	447	0.082200343	0.100707472	0.997234826
S1_2304141	1	2383832	0.002900219	0.363534676	447	0.082200343	0.100697733	0.997234826
S8_2315704	8	2455913	0.002904498	0.466442953	447	0.082200343	0.100692064	0.997234826
S9_88735026	9	92070613	0.002908193	0.444071588	447	0.082200343	0.100687175	0.997234826
S5_68512496	5	70444338	0.002911481	0.074944072	447	0.082200343	0.10068283	0.997234826
S5_129559917	5	132989505	0.002914375	0.406040268	447	0.082200343	0.10067901	0.997234826
S9_18947708	9	18858174	0.002916037	0.341163311	447	0.082200343	0.100676818	0.997234826
S9_153533799	9	156695038	0.002916968	0.46196868	447	0.082200343	0.10067559	0.997234826
S8_114742458	8	117495528	0.0029214	0.31655481	447	0.082200343	0.100669753	0.997234826
S8_114742460	8	117495530	0.0029214	0.31655481	447	0.082200343	0.100669753	0.997234826
S8_114742462	8	117495532	0.0029214	0.31655481	447	0.082200343	0.100669753	0.997234826
S1_240670694	1	244273636	0.002924908	0.167785235	447	0.082200343	0.10066514	0.997234826
S3_147621990	3	148916972	0.002927998	0.439597315	447	0.082200343	0.100661079	0.997234826
S6_161116581	6	165278739	0.002929083	0.38590604	447	0.082200343	0.100659655	0.997234826
S1_222399617	1	225782989	0.002932262	0.362416107	447	0.082200343	0.100655485	0.997234826
S4_236885682	4	242138849	0.002937901	0.268456376	447	0.082200343	0.100648099	0.997234826
S1_183811522	1	185881186	0.002938604	0.20917226	447	0.082200343	0.100647179	0.997234826
S1_183811523	1	185881187	0.002938604	0.20917226	447	0.082200343	0.100647179	0.997234826
S1_183811524	1	185881188	0.002938604	0.20917226	447	0.082200343	0.100647179	0.997234826
S1_183811526	1	185881190	0.002938604	0.20917226	447	0.082200343	0.100647179	0.997234826
S2_144801750	2	149354510	0.002948147	0.112975391	447	0.082200343	0.100634715	0.997234826
S9_153427516	9	156587683	0.002950507	0.177852349	447	0.082200343	0.100631638	0.997234826
S2_212479133	2	219295026	0.002952525	0.357941834	447	0.082200343	0.10062901	0.997234826
S8_35396744	8	36376431	0.002953191	0.323266219	447	0.082200343	0.100628144	0.997234826
S8_35396745	8	36376432	0.002953191	0.323266219	447	0.082200343	0.100628144	0.997234826
S9_136089005	9	138658021	0.002960054	0.365771812	447	0.082200343	0.10061922	0.997234826
S4_25326618	4	26911786	0.002963963	0.135346756	447	0.082200343	0.100614148	0.997234826
S7_115193011	7	118597762	0.002970273	0.300894855	447	0.082200343	0.100605974	0.997234826
S2_109000484	2	112116260	0.002972967	0.455257271	447	0.082200343	0.100602489	0.997234826
S4_185193361	4	188636257	0.002983855	0.451901566	447	0.082200343	0.100588438	0.997234826
S2_40003378	2	41639696	0.002988229	0.163310962	447	0.082200343	0.100582809	0.997234826
S1_284007043	1	289126918	0.002991038	0.24049217	447	0.082200343	0.100579198	0.997234826
S5_131562082	5	134894733	0.002993387	0.38590604	447	0.082200343	0.100576181	0.997234826
S8_165858833	8	171067669	0.002997492	0.384787472	447	0.082200343	0.100570915	0.997234826
S8_163909538	8	168889613	0.002999468	0.394854586	447	0.082200343	0.100568383	0.997234826
S5_172919550	5	177040437	0.003002019	0.138702461	447	0.082200343	0.100565116	0.997234826
S7_153316439	7	158667667	0.003005331	0.341163311	447	0.082200343	0.100560878	0.997234826
S8_165858703	8	171067539	0.003013638	0.317673378	447	0.082200343	0.100550271	0.997234826
S5_191219139	5	196590042	0.003033137	0.058165548	447	0.082200343	0.100525492	0.997234826
S3_148298879	3	149605055	0.003037033	0.310961969	447	0.082200343	0.100520559	0.997234826
S6_162189914	6	166383038	0.003037577	0.174496644	447	0.082200343	0.100519871	0.997234826
S1_129436685	1	131720431	0.003040399	0.467561521	447	0.082200343	0.100516304	0.997234826
S6_80048594	6	83034709	0.003041466	0.277404922	447	0.082200343	0.100514956	0.997234826
S8_3487845	8	3686565	0.003043102	0.065995526	447	0.082200343	0.100512889	0.997234826
S2_5069362	2	5019013	0.003050089	0.287472036	447	0.082200343	0.100504079	0.997234826
S1_10978166	1	11144402	0.003056189	0.305369128	447	0.082200343	0.100496405	0.997234826
S2_21012562	2	22298946	0.003060712	0.46196868	447	0.082200343	0.100490723	0.997234826
S1_281069286	1	286171000	0.003077557	0.412751678	447	0.082200343	0.100469641	0.997234826
S5_215064686	5	220944102	0.00308692	0.174496644	447	0.082200343	0.100457974	0.997234826
S1_271321696	1	276054560	0.003088659	0.298657718	447	0.082200343	0.100455812	0.997234826
S1_9216074	1	9256729	0.00308872	0.083892617	447	0.082200343	0.100455735	0.997234826
S3_172671000	3	175088122	0.003091651	0.29082774	447	0.082200343	0.100452093	0.997234826
S2_110823844	2	114013650	0.003101077	0.380313199	447	0.082200343	0.100440402	0.997234826
S8_161790401	8	166791934	0.003102876	0.232662192	447	0.082200343	0.100438174	0.997234826
S1_244469265	1	248105090	0.003108042	0.177852349	447	0.082200343	0.100431786	0.997234826
S7_100035343	7	103179272	0.003118823	0.394854586	447	0.082200343	0.100418489	0.997234826
S1_173423064	1	175378968	0.00312092	0.432885906	447	0.082200343	0.100415909	0.997234826
S7_112971363	7	116258909	0.003124549	0.203579418	447	0.082200343	0.100411447	0.997234826
S2_117772964	2	121700675	0.00312534	0.412751678	447	0.082200343	0.100410474	0.997234826
S5_203106318	5	208536566	0.003134312	0.237136465	447	0.082200343	0.100399467	0.997234826
S9_1077476	9	742425	0.003135286	0.142058166	447	0.082200343	0.100398275	0.997234826
S10_141349093	10	142132495	0.003144853	0.406040268	447	0.082200343	0.100386577	0.997234826
S7_38659705	7	40008550	0.003147436	0.403803132	447	0.082200343	0.100383425	0.997234826
S8_129124607	8	133026854	0.00314749	0.497762864	447	0.082200343	0.100383359	0.997234826
S8_129124555	8	133026802	0.00314749	0.497762864	447	0.082200343	0.100383359	0.997234826
S8_129124556	8	133026803	0.00314749	0.497762864	447	0.082200343	0.100383359	0.997234826
S8_129124576	8	133026823	0.00314749	0.497762864	447	0.082200343	0.100383359	0.997234826
S10_77271909	10	76630951	0.003149673	0.432885906	447	0.082200343	0.100380697	0.997234826
S1_200724287	1	203222616	0.003151567	0.431767338	447	0.082200343	0.10037839	0.997234826
S7_51623695	7	53395186	0.003157932	0.457494407	447	0.082200343	0.100370644	0.997234826
S8_173409229	8	178702434	0.003162538	0.360178971	447	0.082200343	0.100365049	0.997234826
S3_10608023	3	9878103	0.003171039	0.35458613	447	0.082200343	0.100354744	0.997234826
S8_165721029	8	170924508	0.003172405	0.403803132	447	0.082200343	0.100353092	0.997234826
S2_130536233	2	134700052	0.003174957	0.446308725	447	0.082200343	0.100350005	0.997234826
S7_139602707	7	144353263	0.003181962	0.089485459	447	0.082200343	0.100341545	0.997234826
S1_27112315	1	27297927	0.003191685	0.089485459	447	0.082200343	0.100329835	0.997234826
S9_13426123	9	13084974	0.003197936	0.068232662	447	0.082200343	0.100322325	0.997234826
S2_44452426	2	46308272	0.003217803	0.416107383	447	0.082200343	0.100298557	0.997234826
S4_182590594	4	185945065	0.003227922	0.211409396	447	0.082200343	0.10028651	0.997234826
S8_35643586	8	36618879	0.003231234	0.270693512	447	0.082200343	0.100282575	0.997234826
S3_227429403	3	231344443	0.003247841	0.200223714	447	0.082200343	0.100262906	0.997234826
S4_222032459	4	226371341	0.003252412	0.247203579	447	0.082200343	0.100257509	0.997234826
S1_223771124	1	227373724	0.003262679	0.322147651	447	0.082200343	0.100245418	0.997234826
S7_40327078	7	41809666	0.003282814	0.36689038	447	0.082200343	0.100221817	0.997234826
S2_3875199	2	3892122	0.003297592	0.391498881	447	0.082200343	0.100204588	0.997234826
S5_16844921	5	17460539	0.003298696	0.380313199	447	0.082200343	0.100203305	0.997234826
S8_138659460	8	142747216	0.003300347	0.412751678	447	0.082200343	0.100201385	0.997234826
S2_169093676	2	173916042	0.003311354	0.453020134	447	0.082200343	0.100188615	0.997234826
S3_227429373	3	231344413	0.003313927	0.200223714	447	0.082200343	0.100185637	0.997234826
S8_164363275	8	169369613	0.003316855	0.37360179	447	0.082200343	0.10018225	0.997234826
S5_68651209	5	70577298	0.003317329	0.432885906	447	0.082200343	0.100181702	0.997234826
S5_167007755	5	170915284	0.003320985	0.25950783	447	0.082200343	0.100177477	0.997234826
S9_12578330	9	12055220	0.003324632	0.101789709	447	0.082200343	0.100173269	0.997234826
S8_24869211	8	25663842	0.003329249	0.345637584	447	0.082200343	0.100167946	0.997234826
S9_113427635	9	116762211	0.003332761	0.437360179	447	0.082200343	0.100163903	0.997234826
S3_114790693	3	115132492	0.003335256	0.402684564	447	0.082200343	0.100161034	0.997234826
S6_148362825	6	152421871	0.003349457	0.099552573	447	0.082200343	0.100144742	0.997234826
S3_215471959	3	219080724	0.003349911	0.300894855	447	0.082200343	0.100144222	0.997234826
S1_180612064	1	182582757	0.00335007	0.371364653	447	0.082200343	0.10014404	0.997234826
S8_169995866	8	175177956	0.003371054	0.458612975	447	0.082200343	0.1001201	0.997234826
S9_141452412	9	144102266	0.003371696	0.379194631	447	0.082200343	0.10011937	0.997234826
S8_129773940	8	133664263	0.003376173	0.298657718	447	0.082200343	0.100114282	0.997234826
S7_155025923	7	160353152	0.003386917	0.344519016	447	0.082200343	0.100102103	0.997234826
S7_99644813	7	102774931	0.003386985	0.418344519	447	0.082200343	0.100102025	0.997234826
S1_10582795	1	10751127	0.00340047	0.286353468	447	0.082200343	0.100086794	0.997234826
S2_6567149	2	6492960	0.003401795	0.241610738	447	0.082200343	0.1000853	0.997234826
S5_194560419	5	199881900	0.003403231	0.399328859	447	0.082200343	0.100083683	0.997234826
S7_7008231	7	7396195	0.003407847	0.451901566	447	0.082200343	0.100078488	0.997234826
S9_128662072	9	130902600	0.003410429	0.468680089	447	0.082200343	0.100075585	0.997234826
S7_115277315	7	118689668	0.00341067	0.36689038	447	0.082200343	0.100075314	0.997234826
S2_2056177	2	2053216	0.003414292	0.455257271	447	0.082200343	0.100071245	0.997234826
S6_110783840	6	111053932	0.003420942	0.156599553	447	0.082200343	0.100063788	0.997234826
S9_14325907	9	14012444	0.003426108	0.317673378	447	0.082200343	0.100058005	0.997234826
S8_86403124	8	88064474	0.003429691	0.322147651	447	0.082200343	0.100053999	0.997234826
S8_162856670	8	167863086	0.00343118	0.468680089	447	0.082200343	0.100052335	0.997234826
S5_184171709	5	188800426	0.00343465	0.074944072	447	0.082200343	0.100048462	0.997234826
S9_145525511	9	148365692	0.003441096	0.244966443	447	0.082200343	0.100041276	0.997234826
S7_141905933	7	146833879	0.003441641	0.121923937	447	0.082200343	0.100040669	0.997234826
S1_7162859	1	7146934	0.003446239	0.261744966	447	0.082200343	0.100035553	0.997234826
S1_11476285	1	11666120	0.003449693	0.20917226	447	0.082200343	0.100031714	0.997234826
S7_5784557	7	6104860	0.00345208	0.427293065	447	0.082200343	0.100029064	0.997234826
S6_38268261	6	40026347	0.003458015	0.376957494	447	0.082200343	0.100022482	0.997234826
S5_208167409	5	213916476	0.003460226	0.359060403	447	0.082200343	0.100020033	0.997234826
S4_177439323	4	180359852	0.003461468	0.402684564	447	0.082200343	0.100018658	0.997234826
S1_225589374	1	229247443	0.003463312	0.465324385	447	0.082200343	0.100016617	0.997234826
S9_101269410	9	104738343	0.003468156	0.302013423	447	0.082200343	0.100011262	0.997234826
S4_167074619	4	170029989	0.003474933	0.281879195	447	0.082200343	0.100003782	0.997234826
S1_33122254	1	33451982	0.003480204	0.27852349	447	0.082200343	0.099997975	0.997234826
S1_2304137	1	2383828	0.003481688	0.362416107	447	0.082200343	0.099996341	0.997234826
S1_2304139	1	2383830	0.003481688	0.362416107	447	0.082200343	0.099996341	0.997234826
S9_136770294	9	139353877	0.003483728	0.418344519	447	0.082200343	0.099994097	0.997234826
S1_5809711	1	5883502	0.003485408	0.151006711	447	0.082200343	0.09999225	0.997234826
S7_4901660	7	5210770	0.003485797	0.327740492	447	0.082200343	0.099991823	0.997234826
S9_14542278	9	14230006	0.003492483	0.087248322	447	0.082200343	0.099984482	0.997234826
S7_161290182	7	166772127	0.003494101	0.261744966	447	0.082200343	0.099982707	0.997234826
S4_120628438	4	124422473	0.00350951	0.178970917	447	0.082200343	0.09996585	0.997234826
S1_214846621	1	218005304	0.003527981	0.305369128	447	0.082200343	0.099945743	0.997234826
S6_151476167	6	155629468	0.003538823	0.159955257	447	0.082200343	0.099933992	0.997234826
S4_172776629	4	175857479	0.003542317	0.135346756	447	0.082200343	0.099930212	0.997234826
S3_186929898	3	189867421	0.003553411	0.36689038	447	0.082200343	0.099918237	0.997234826
S8_129495950	8	133385877	0.003564171	0.353467562	447	0.082200343	0.099906658	0.997234826
S5_204169168	5	209614357	0.003568773	0.118568233	447	0.082200343	0.099901717	0.997234826
S10_140166979	10	140890370	0.00357148	0.362416107	447	0.082200343	0.099898813	0.997234826
S2_5564808	2	5506605	0.003572749	0.380313199	447	0.082200343	0.099897453	0.997234826
S7_105628645	7	108894834	0.003575595	0.446308725	447	0.082200343	0.099894404	0.997234826
S9_101199032	9	104672940	0.003577349	0.12639821	447	0.082200343	0.099892526	0.997234826
S10_121411920	10	122510257	0.003588249	0.375838926	447	0.082200343	0.099880878	0.997234826
S2_233678454	2	240565941	0.003592101	0.286353468	447	0.082200343	0.09987677	0.997234826
S6_34567988	6	36100401	0.003592248	0.467561521	447	0.082200343	0.099876613	0.997234826
S9_35048909	9	36520496	0.003599472	0.05033557	447	0.082200343	0.099868921	0.997234826
S10_122816319	10	123911463	0.00359969	0.078299776	447	0.082200343	0.09986869	0.997234826
S3_187002239	3	189941308	0.003606145	0.419463087	447	0.082200343	0.09986183	0.997234826
S7_115277299	7	118689652	0.003617286	0.365771812	447	0.082200343	0.099850021	0.997234826
S8_150569707	8	155137819	0.003618036	0.236017897	447	0.082200343	0.099849228	0.997234826
S7_102395946	7	105593417	0.003618579	0.369127517	447	0.082200343	0.099848653	0.997234826
S2_130690397	2	134854958	0.003622142	0.419463087	447	0.082200343	0.099844886	0.997234826
S2_130690403	2	134854964	0.003622142	0.419463087	447	0.082200343	0.099844886	0.997234826
S2_11753075	2	12045960	0.003623134	0.371364653	447	0.082200343	0.099843837	0.997234826
S3_201545081	3	204731750	0.003627626	0.119686801	447	0.082200343	0.099839094	0.997234826
S7_155258723	7	160633351	0.003630435	0.091722595	447	0.082200343	0.099836131	0.997234826
S1_224257853	1	227875730	0.003632501	0.467561521	447	0.082200343	0.099833954	0.997234826
S2_136667111	2	141338114	0.00363424	0.348993289	447	0.082200343	0.099832122	0.997234826
S4_177636215	4	180612491	0.003639289	0.368008949	447	0.082200343	0.099826807	0.997234826
S8_10856861	8	11255783	0.003648152	0.451901566	447	0.082200343	0.099817498	0.997234826
S5_130470445	5	133935636	0.003652999	0.43064877	447	0.082200343	0.099812415	0.997234826
S4_138155354	4	141310943	0.003655625	0.111856823	447	0.082200343	0.099809665	0.997234826
S7_130093145	7	134113112	0.003656635	0.146532438	447	0.082200343	0.099808608	0.997234826
S1_33122261	1	33451989	0.003660069	0.267337808	447	0.082200343	0.099805016	0.997234826
S5_82953397	5	85120166	0.00366075	0.1901566	447	0.082200343	0.099804303	0.997234826
S7_153569548	7	158959791	0.003670248	0.399328859	447	0.082200343	0.099794387	0.997234826
S2_7953163	2	8139478	0.003680818	0.281879195	447	0.082200343	0.099783381	0.997234826
S9_130096826	9	132374915	0.003683776	0.394854586	447	0.082200343	0.099780307	0.997234826
S1_5648051	1	5718009	0.003684605	0.177852349	447	0.082200343	0.099779447	0.997234826
S1_199501796	1	201965105	0.003684874	0.371364653	447	0.082200343	0.099779167	0.997234826
S9_137091740	9	139691823	0.00369426	0.090604027	447	0.082200343	0.099769432	0.997234826
S8_171625362	8	176870967	0.003696783	0.4049217	447	0.082200343	0.09976682	0.997234826
S8_18444014	8	19077665	0.003698015	0.274049217	447	0.082200343	0.099765545	0.997234826
S2_209114287	2	215960968	0.003699001	0.291946309	447	0.082200343	0.099764525	0.997234826
S1_206738648	1	209572194	0.003704994	0.233780761	447	0.082200343	0.09975833	0.997234826
S1_71795479	1	73080930	0.003706602	0.484340045	447	0.082200343	0.09975667	0.997234826
S2_104966995	2	107914598	0.003716462	0.098434004	447	0.082200343	0.099746507	0.997234826
S3_187027917	3	189966985	0.003717958	0.403803132	447	0.082200343	0.099744966	0.997234826
S3_187027918	3	189966986	0.003717958	0.403803132	447	0.082200343	0.099744966	0.997234826
S8_646252	8	774699	0.003718782	0.383668904	447	0.082200343	0.099744118	0.997234826
S1_10582794	1	10751126	0.00371914	0.299776286	447	0.082200343	0.09974375	0.997234826
S7_138593683	7	143318550	0.003721315	0.131991051	447	0.082200343	0.099741514	0.997234826
S1_249499888	1	253357140	0.003722156	0.431767338	447	0.082200343	0.099740649	0.997234826
S4_179793010	4	182743507	0.003726254	0.22147651	447	0.082200343	0.099736439	0.997234826
S7_115193008	7	118597759	0.003728433	0.353467562	447	0.082200343	0.099734203	0.997234826
S4_179793012	4	182743509	0.003731718	0.219239374	447	0.082200343	0.099730833	0.997234826
S3_170493942	3	173129231	0.003739888	0.282997763	447	0.082200343	0.099722467	0.997234826
S9_35413924	9	36881037	0.003760453	0.051454139	447	0.082200343	0.09970149	0.997234826
S6_34440016	6	35985584	0.003760769	0.117449664	447	0.082200343	0.099701169	0.997234826
S8_163909542	8	168889617	0.003761636	0.387024609	447	0.082200343	0.099700287	0.997234826
S1_229107481	1	232601001	0.003774612	0.193512304	447	0.082200343	0.099687116	0.997234826
S8_172754860	8	178056651	0.003775367	0.478747204	447	0.082200343	0.09968635	0.997234826
S8_25010034	8	25815114	0.003777397	0.421700224	447	0.082200343	0.099684295	0.997234826
S7_132080069	7	136131223	0.003780753	0.25950783	447	0.082200343	0.099680898	0.997234826
S2_184992691	2	190580714	0.003783135	0.181208054	447	0.082200343	0.099678489	0.997234826
S7_82324473	7	85214816	0.003784959	0.375838926	447	0.082200343	0.099676646	0.997234826
S3_28140305	3	27759731	0.003788533	0.453020134	447	0.082200343	0.099673037	0.997234826
S5_195627418	5	200821937	0.003790761	0.44295302	447	0.082200343	0.099670788	0.997234826
S1_248596019	1	252528887	0.00379399	0.417225951	447	0.082200343	0.099667532	0.997234826
S3_149554251	3	150855530	0.003796821	0.371364653	447	0.082200343	0.099664679	0.997234826
S3_225349073	3	229142600	0.003802467	0.379194631	447	0.082200343	0.099658997	0.997234826
S4_185181378	4	188624274	0.003807093	0.445190157	447	0.082200343	0.099654348	0.997234826
S1_284007084	1	289126959	0.003812703	0.37360179	447	0.082200343	0.099648717	0.997234826
S7_76285533	7	78839221	0.00381356	0.44295302	447	0.082200343	0.099647857	0.997234826
S7_161290191	7	166772136	0.003818573	0.262863535	447	0.082200343	0.099642834	0.997234826
S2_2550291	2	2564212	0.003822446	0.333333333	447	0.082200343	0.099638958	0.997234826
S9_153775384	9	156921668	0.003823546	0.425055928	447	0.082200343	0.099637857	0.997234826
S5_212677311	5	218512430	0.003824095	0.326621924	447	0.082200343	0.099637309	0.997234826
S5_188466193	5	193503890	0.003825192	0.387024609	447	0.082200343	0.099636212	0.997234826
S10_142792308	10	143569980	0.003846793	0.393736018	447	0.082200343	0.099614682	0.997234826
S1_223626450	1	227224336	0.003854498	0.236017897	447	0.082200343	0.099607032	0.997234826
S1_223626474	1	227224360	0.003854498	0.236017897	447	0.082200343	0.099607032	0.997234826
S4_202074560	4	206382111	0.00385545	0.446308725	447	0.082200343	0.099606088	0.997234826
S3_184069292	3	187051327	0.003856827	0.34787472	447	0.082200343	0.099604722	0.997234826
S2_136667161	2	141338164	0.003862007	0.34787472	447	0.082200343	0.099599591	0.997234826
S8_19830105	8	20524394	0.003865819	0.420581655	447	0.082200343	0.09959582	0.997234826
S8_173864666	8	179101256	0.003876039	0.302013423	447	0.082200343	0.099585727	0.997234826
S1_2089585	1	2156128	0.003882402	0.336689038	447	0.082200343	0.099579458	0.997234826
S1_11475834	1	11665669	0.003882751	0.341163311	447	0.082200343	0.099579114	0.997234826
S10_121604747	10	122709611	0.003884619	0.464205817	447	0.082200343	0.099577275	0.997234826
S1_244159588	1	247826213	0.003896927	0.403803132	447	0.082200343	0.099565184	0.997234826
S2_118535963	2	122503861	0.003899574	0.315436242	447	0.082200343	0.099562589	0.997234826
S9_151764660	9	154916288	0.003904122	0.476510067	447	0.082200343	0.099558134	0.997234826
S6_107380783	6	112037171	0.003904122	0.180089485	447	0.082200343	0.099558134	0.997234826
S5_168671666	5	172643628	0.003904501	0.406040268	447	0.082200343	0.099557763	0.997234826
S4_185386009	4	188826581	0.003905114	0.116331096	447	0.082200343	0.099557163	0.997234826
S4_185386010	4	188826582	0.003905114	0.116331096	447	0.082200343	0.099557163	0.997234826
S4_185386013	4	188826585	0.003905114	0.116331096	447	0.082200343	0.099557163	0.997234826
S8_26869065	8	27722119	0.003905379	0.115212528	447	0.082200343	0.099556904	0.997234826
S2_188059469	2	193725543	0.003907438	0.319910515	447	0.082200343	0.09955489	0.997234826
S2_84653737	2	86939294	0.003908349	0.192393736	447	0.082200343	0.099553998	0.997234826
S2_84653744	2	86939301	0.003908349	0.192393736	447	0.082200343	0.099553998	0.997234826
S2_193734489	2	199601430	0.003911536	0.470917226	447	0.082200343	0.099550883	0.997234826
S7_4111969	7	4281221	0.003928168	0.376957494	447	0.082200343	0.099534668	0.997234826
S8_165858699	8	171067535	0.003934313	0.317673378	447	0.082200343	0.099528694	0.997234826
S5_213726239	5	219578022	0.003934471	0.473154362	447	0.082200343	0.099528541	0.997234826
S1_2304142	1	2383833	0.003937806	0.363534676	447	0.082200343	0.099525303	0.997234826
S5_44635086	5	45962616	0.00394218	0.161073826	447	0.082200343	0.099521062	0.997234826
S5_44635091	5	45962621	0.00394218	0.161073826	447	0.082200343	0.099521062	0.997234826
S6_130006259	6	134090717	0.003942811	0.400447427	447	0.082200343	0.09952045	0.997234826
S1_11476130	1	11665965	0.003945993	0.225950783	447	0.082200343	0.099517367	0.997234826
S7_4901642	7	5210752	0.00394917	0.317673378	447	0.082200343	0.099514292	0.997234826
S5_212029475	5	217873504	0.003955139	0.269574944	447	0.082200343	0.099508521	0.997234826
S9_143892516	9	146686755	0.003958942	0.081655481	447	0.082200343	0.099504849	0.997234826
S5_194560176	5	199881657	0.003965269	0.422818792	447	0.082200343	0.099498748	0.997234826
S3_50780889	3	50595259	0.003970297	0.288590604	447	0.082200343	0.099493906	0.997234826
S8_646251	8	774698	0.003979366	0.25950783	447	0.082200343	0.09948519	0.997234826
S1_223688064	1	227288409	0.003980868	0.344519016	447	0.082200343	0.099483747	0.997234826
S5_68651487	5	70577576	0.003982286	0.437360179	447	0.082200343	0.099482386	0.997234826
S2_55877405	2	57939510	0.003992124	0.098434004	447	0.082200343	0.099472961	0.997234826
S8_133934841	8	137866721	0.003993559	0.197986577	447	0.082200343	0.099471588	0.997234826
S2_109000206	2	112115982	0.003994884	0.454138702	447	0.082200343	0.09947032	0.997234826
S8_129124587	8	133026834	0.004006402	0.494407159	447	0.082200343	0.099459323	0.997234826
S9_151764832	9	154916460	0.004010427	0.478747204	447	0.082200343	0.099455488	0.997234826
S8_163912462	8	168892537	0.004014551	0.374720358	447	0.082200343	0.099451561	0.997234826
S3_9456573	3	8731881	0.004021589	0.203579418	447	0.082200343	0.099444871	0.997234826
S2_7953162	2	8139477	0.004037286	0.284116331	447	0.082200343	0.099429992	0.997234826
S5_3641481	5	3734763	0.004038034	0.16442953	447	0.082200343	0.099429285	0.997234826
S7_131037702	7	135068053	0.004040449	0.060402685	447	0.082200343	0.099427002	0.997234826
S9_124642986	9	126697066	0.004040572	0.36689038	447	0.082200343	0.099426885	0.997234826
S8_173252164	8	178454627	0.004044574	0.413870246	447	0.082200343	0.099423104	0.997234826
S5_114766576	5	117646410	0.004050071	0.222595078	447	0.082200343	0.099417917	0.997234826
S2_18118874	2	19327974	0.004055886	0.270693512	447	0.082200343	0.099412438	0.997234826
S2_12336559	2	12636519	0.004064188	0.263982103	447	0.082200343	0.09940463	0.997234826
S9_137873250	9	140471136	0.0040682	0.272930649	447	0.082200343	0.099400862	0.997234826
S2_109854561	2	112989021	0.004082058	0.465324385	447	0.082200343	0.099387877	0.997234826
S6_34635457	6	36172319	0.004085566	0.372483221	447	0.082200343	0.099384598	0.997234826
S2_28622400	2	30031065	0.004087825	0.170022371	447	0.082200343	0.099382486	0.997234826
S5_8002907	5	8370578	0.004088217	0.426174497	447	0.082200343	0.09938212	0.997234826
S6_153232846	6	157407863	0.00408838	0.393736018	447	0.082200343	0.099381968	0.997234826
S7_75923224	7	78475814	0.004101777	0.155480984	447	0.082200343	0.099369478	0.997234826
S7_75923243	7	78475833	0.004101777	0.155480984	447	0.082200343	0.099369478	0.997234826
S3_125744978	3	126165821	0.00410356	0.427293065	447	0.082200343	0.099367818	0.997234826
S9_100991933	9	104447790	0.004104484	0.083892617	447	0.082200343	0.099366959	0.997234826
S10_76953471	10	76308977	0.004104995	0.248322148	447	0.082200343	0.099366484	0.997234826
S2_110157343	2	113304362	0.004116269	0.079418345	447	0.082200343	0.099356013	0.997234826
S6_8680999	6	9104539	0.004116584	0.08836689	447	0.082200343	0.099355721	0.997234826
S2_85608656	2	87863344	0.004119272	0.4049217	447	0.082200343	0.099353229	0.997234826
S4_234399171	4	239597354	0.004126626	0.193512304	447	0.082200343	0.09934642	0.997234826
S8_3482586	8	3681306	0.004126681	0.460850112	447	0.082200343	0.099346369	0.997234826
S2_228985480	2	236089292	0.004132628	0.205816555	447	0.082200343	0.099340872	0.997234826
S4_226006703	4	230924003	0.004139752	0.478747204	447	0.082200343	0.099334297	0.997234826
S5_55928254	5	57723474	0.004150958	0.097315436	447	0.082200343	0.099323979	0.997234826
S7_76563130	7	79116242	0.004151062	0.457494407	447	0.082200343	0.099323883	0.997234826
S1_276361699	1	281283402	0.004151408	0.268456376	447	0.082200343	0.099323565	0.997234826
S8_113874304	8	116654608	0.004153295	0.201342282	447	0.082200343	0.09932183	0.997234826
S2_117320875	2	121224860	0.004157919	0.189038031	447	0.082200343	0.099317584	0.997234826
S4_15902421	4	17034391	0.004162504	0.1901566	447	0.082200343	0.099313377	0.997234826
S3_145476371	3	146585163	0.004176855	0.429530201	447	0.082200343	0.099300241	0.997234826
S1_213097597	1	216170721	0.004181811	0.255033557	447	0.082200343	0.099295716	0.997234826
S2_2677778	2	2689668	0.004189768	0.287472036	447	0.082200343	0.099288462	0.997234826
S5_131178181	5	134675830	0.00419177	0.234899329	447	0.082200343	0.099286638	0.997234826
S5_63620667	5	65522844	0.004194066	0.154362416	447	0.082200343	0.099284549	0.997234826
S2_5998602	2	5947680	0.004195939	0.281879195	447	0.082200343	0.099282845	0.997234826
S6_24184876	6	25564969	0.004196776	0.431767338	447	0.082200343	0.099282083	0.997234826
S5_42458846	5	43726091	0.004204224	0.285234899	447	0.082200343	0.099275318	0.997234826
S7_155252229	7	160626857	0.004205623	0.454138702	447	0.082200343	0.099274048	0.997234826
S6_23724440	6	22132125	0.004206557	0.352348993	447	0.082200343	0.099273201	0.997234826
S6_23724453	6	22132138	0.004206557	0.352348993	447	0.082200343	0.099273201	0.997234826
S2_208330073	2	215158376	0.004215938	0.428411633	447	0.082200343	0.099264701	0.997234826
S9_153958981	9	157107507	0.004218056	0.276286353	447	0.082200343	0.099262784	0.997234826
S7_76299875	7	78853563	0.004230381	0.454138702	447	0.082200343	0.099251652	0.997234826
S10_76948228	10	76303734	0.004236649	0.262863535	447	0.082200343	0.099246004	0.997234826
S2_208330084	2	215158387	0.004237823	0.340044743	447	0.082200343	0.099244946	0.997234826
S6_162189879	6	166383003	0.004238672	0.175615213	447	0.082200343	0.099244182	0.997234826
S8_124849952	8	128258150	0.00424386	0.441834452	447	0.082200343	0.099239515	0.997234826
S6_52688240	6	55268028	0.004245251	0.466442953	447	0.082200343	0.099238265	0.997234826
S6_147219176	6	151264812	0.004246872	0.251677852	447	0.082200343	0.099236809	0.997234826
S10_1154268	10	708475	0.004260777	0.436241611	447	0.082200343	0.099224339	0.997234826
S8_172365929	8	177674561	0.00426372	0.20917226	447	0.082200343	0.099221705	0.997234826
S9_128456962	9	130692173	0.004274866	0.338926174	447	0.082200343	0.099211746	0.997234826
S2_130690419	2	134854980	0.004280381	0.418344519	447	0.082200343	0.099206829	0.997234826
S8_110801471	8	113482149	0.004284895	0.447427293	447	0.082200343	0.099202808	0.997234826
S1_265470109	1	270278003	0.00429178	0.222595078	447	0.082200343	0.099196684	0.997234826
S5_4652074	5	4763381	0.00430537	0.29082774	447	0.082200343	0.099184626	0.997234826
S2_38985963	2	40564455	0.004306196	0.384787472	447	0.082200343	0.099183895	0.997234826
S7_76299881	7	78853569	0.004308625	0.099552573	447	0.082200343	0.099181744	0.997234826
S3_17257863	3	16611248	0.004320903	0.387024609	447	0.082200343	0.099170892	0.997234826
S8_162833390	8	167839738	0.004321031	0.362416107	447	0.082200343	0.099170779	0.997234826
S2_5006004	2	4936335	0.004321251	0.29082774	447	0.082200343	0.099170584	0.997234826
S8_14542154	8	14952931	0.004322953	0.436241611	447	0.082200343	0.099169083	0.997234826
S2_6335646	2	6290292	0.004331316	0.227069351	447	0.082200343	0.099161713	0.997234826
S2_188059487	2	193725561	0.004335917	0.272930649	447	0.082200343	0.099157664	0.997234826
S1_10989161	1	11155397	0.004357468	0.139821029	447	0.082200343	0.099138759	0.997234826
S1_33884432	1	34217550	0.004363547	0.420581655	447	0.082200343	0.099133444	0.997234826
S4_175275483	4	178303613	0.004364694	0.267337808	447	0.082200343	0.099132442	0.997234826
S3_154099336	3	155510408	0.004373264	0.402684564	447	0.082200343	0.099124963	0.997234826
S9_152794787	9	155937742	0.004377698	0.181208054	447	0.082200343	0.0991211	0.997234826
S7_86024907	7	88856286	0.004399617	0.306487696	447	0.082200343	0.09910206	0.997234826
S1_4055146	1	4135494	0.004399966	0.344519016	447	0.082200343	0.099101758	0.997234826
S5_90343409	5	92671384	0.004406039	0.184563758	447	0.082200343	0.099096499	0.997234826
S10_114198191	10	115205879	0.004415397	0.394854586	447	0.082200343	0.099088412	0.997234826
S6_34570444	6	36102857	0.004417334	0.494407159	447	0.082200343	0.09908674	0.997234826
S1_223772276	1	227374876	0.004422599	0.444071588	447	0.082200343	0.0990822	0.997234826
S5_175709330	5	179736413	0.004422849	0.498881432	447	0.082200343	0.099081984	0.997234826
S4_185387060	4	188827632	0.004424714	0.111856823	447	0.082200343	0.099080377	0.997234826
S3_225349072	3	229142599	0.004431989	0.378076063	447	0.082200343	0.099074116	0.997234826
S3_225349074	3	229142601	0.004431989	0.378076063	447	0.082200343	0.099074116	0.997234826
S2_117313212	2	121217200	0.004438807	0.130872483	447	0.082200343	0.099068257	0.997234826
S2_15341693	2	15739087	0.004457543	0.44966443	447	0.082200343	0.099052205	0.997234826
S7_133605993	7	137712706	0.004478513	0.36689038	447	0.082200343	0.09903432	0.997234826
S2_12681938	2	12956374	0.004481647	0.466442953	447	0.082200343	0.099031654	0.997234826
S3_154667449	3	156135081	0.00448286	0.44295302	447	0.082200343	0.099030623	0.997234826
S1_288696626	1	294012946	0.004491725	0.473154362	447	0.082200343	0.099023095	0.997234826
S1_33882311	1	34215430	0.004503655	0.353467562	447	0.082200343	0.099012989	0.997234826
S4_149366120	4	152758894	0.004510585	0.4049217	447	0.082200343	0.099007131	0.997234826
S5_186179356	5	190877845	0.004521693	0.072706935	447	0.082200343	0.09899776	0.997234826
S7_69825294	7	72012051	0.004533554	0.288590604	447	0.082200343	0.098987781	0.997234826
S7_76267462	7	78821154	0.004535266	0.138702461	447	0.082200343	0.098986342	0.997234826
S7_76267470	7	78821162	0.004535266	0.138702461	447	0.082200343	0.098986342	0.997234826
S3_5956015	3	5119766	0.004537265	0.257270694	447	0.082200343	0.098984663	0.997234826
S1_280977319	1	286080488	0.004542011	0.336689038	447	0.082200343	0.098980681	0.997234826
S2_5904086	2	5852227	0.004545465	0.225950783	447	0.082200343	0.098977785	0.997234826
S5_68528463	5	70460305	0.004546021	0.228187919	447	0.082200343	0.098977319	0.997234826
S3_147971782	3	149278787	0.004550884	0.196868009	447	0.082200343	0.098973246	0.997234826
S2_110089146	2	113251882	0.004552163	0.43064877	447	0.082200343	0.098972176	0.997234826
S1_158483710	1	159889294	0.004554579	0.12639821	447	0.082200343	0.098970155	0.997234826
S2_22241375	2	23532295	0.004556387	0.131991051	447	0.082200343	0.098968643	0.997234826
S3_226806272	3	230723181	0.004558609	0.312080537	447	0.082200343	0.098966786	0.997234826
S2_108869776	2	111957722	0.004565455	0.422818792	447	0.082200343	0.098961071	0.997234826
S9_101199036	9	104672944	0.004576106	0.106263982	447	0.082200343	0.098952195	0.997234826
S3_154648521	3	156116153	0.004579379	0.315436242	447	0.082200343	0.098949472	0.997234826
S2_117320997	2	121224982	0.004580461	0.167785235	447	0.082200343	0.098948573	0.997234826
S2_17586161	2	18804609	0.004583347	0.182326622	447	0.082200343	0.098946173	0.997234826
S1_172947954	1	174883507	0.004585486	0.187919463	447	0.082200343	0.098944397	0.997234826
S1_105230168	1	107764284	0.00458735	0.393736018	447	0.082200343	0.098942848	0.997234826
S4_197072445	4	201421297	0.004587946	0.372483221	447	0.082200343	0.098942354	0.997234826
S3_106504867	3	92506473	0.004588348	0.131991051	447	0.082200343	0.09894202	0.997234826
S2_7953160	2	8139475	0.004596426	0.287472036	447	0.082200343	0.098935321	0.997234826
S3_125745015	3	126165858	0.004600159	0.465324385	447	0.082200343	0.098932229	0.997234826
S5_8002881	5	8370552	0.00460206	0.425055928	447	0.082200343	0.098930656	0.997234826
S5_8002904	5	8370575	0.00460206	0.425055928	447	0.082200343	0.098930656	0.997234826
S5_10968200	5	11306864	0.004605849	0.282997763	447	0.082200343	0.098927522	0.997234826
S6_68994246	6	71924339	0.00460595	0.455257271	447	0.082200343	0.098927439	0.997234826
S2_211508185	2	218319539	0.004606537	0.256152125	447	0.082200343	0.098926953	0.997234826
S5_177125273	5	181177754	0.004607497	0.390380313	447	0.082200343	0.09892616	0.997234826
S7_153427312	7	158757683	0.004608122	0.350111857	447	0.082200343	0.098925643	0.997234826
S2_117436677	2	121348386	0.004617652	0.181208054	447	0.082200343	0.098917777	0.997234826
S8_165266706	8	170452485	0.004618842	0.351230425	447	0.082200343	0.098916795	0.997234826
S1_223626425	1	227224311	0.004618873	0.237136465	447	0.082200343	0.09891677	0.997234826
S4_237146203	4	242400860	0.004627048	0.370246085	447	0.082200343	0.098910036	0.997234826
S4_14827829	4	15947134	0.004639375	0.434004474	447	0.082200343	0.098899905	0.997234826
S8_6480666	8	6820389	0.004640042	0.096196868	447	0.082200343	0.098899359	0.997234826
S2_214661215	2	221449347	0.004645712	0.250559284	447	0.082200343	0.098894709	0.997234826
S4_214913069	4	218981198	0.004646818	0.469798658	447	0.082200343	0.098893802	0.997234826
S9_153963594	9	157112120	0.004657497	0.295302013	447	0.082200343	0.098885063	0.997234826
S9_34628795	9	36009625	0.00466411	0.116331096	447	0.082200343	0.098879661	0.997234826
S9_35914453	9	37396491	0.004666605	0.475391499	447	0.082200343	0.098877625	0.997234826
S3_148298896	3	149605072	0.004681808	0.42393736	447	0.082200343	0.098865243	0.997234826
S3_148298906	3	149605082	0.004681808	0.42393736	447	0.082200343	0.098865243	0.997234826
S10_147155058	10	147957024	0.004685508	0.218120805	447	0.082200343	0.098862236	0.997234826
S8_168482928	8	173736466	0.004686013	0.394854586	447	0.082200343	0.098861826	0.997234826
S1_213098211	1	216171335	0.00468847	0.267337808	447	0.082200343	0.09885983	0.997234826
S9_142470337	9	145085891	0.004693388	0.299776286	447	0.082200343	0.098855839	0.997234826
S3_10516609	3	9814880	0.004697758	0.158836689	447	0.082200343	0.098852297	0.997234826
S7_155224360	7	160599189	0.004698035	0.276286353	447	0.082200343	0.098852073	0.997234826
S6_147902301	6	151977001	0.004700099	0.429530201	447	0.082200343	0.098850401	0.997234826
S9_153775376	9	156921660	0.004704196	0.110738255	447	0.082200343	0.098847084	0.997234826
S10_3908492	10	3508664	0.00470551	0.470917226	447	0.082200343	0.098846021	0.997234826
S10_114191400	10	115199090	0.004706455	0.285234899	447	0.082200343	0.098845256	0.997234826
S9_35049375	9	36520962	0.004710618	0.067114094	447	0.082200343	0.098841891	0.997234826
S2_84695218	2	86980768	0.004718157	0.422818792	447	0.082200343	0.098835805	0.997234826
S10_1916581	10	1475501	0.00472075	0.384787472	447	0.082200343	0.098833714	0.997234826
S1_105230143	1	107764259	0.004726537	0.322147651	447	0.082200343	0.098829052	0.997234826
S2_110157301	2	113304320	0.004734825	0.080536913	447	0.082200343	0.098822384	0.997234826
S2_211508130	2	218319484	0.004735277	0.155480984	447	0.082200343	0.098822021	0.997234826
S1_30803599	1	31104634	0.004736024	0.397091723	447	0.082200343	0.09882142	0.997234826
S10_117829056	10	118896920	0.004736611	0.450782998	447	0.082200343	0.098820948	0.997234826
S8_19833834	8	20528123	0.004738173	0.336689038	447	0.082200343	0.098819694	0.997234826
S2_16232846	2	16656613	0.004739355	0.321029083	447	0.082200343	0.098818744	0.997234826
S4_200869431	4	205269998	0.00474313	0.436241611	447	0.082200343	0.098815714	0.997234826
S2_108870271	2	111958217	0.004743797	0.376957494	447	0.082200343	0.098815179	0.997234826
S7_130878006	7	134900357	0.004750996	0.407158837	447	0.082200343	0.098809408	0.997234826
S6_132075773	6	136209799	0.004752631	0.323266219	447	0.082200343	0.098808099	0.997234826
S9_14577580	9	14265952	0.004768744	0.139821029	447	0.082200343	0.098795219	0.997234826
S1_219232609	1	222455755	0.004774098	0.457494407	447	0.082200343	0.09879095	0.997234826
S5_114739802	5	117624439	0.004782985	0.402684564	447	0.082200343	0.098783874	0.997234826
S1_7397614	1	7395653	0.004798719	0.331096197	447	0.082200343	0.098771379	0.997234826
S1_182543729	1	184551250	0.004812662	0.098434004	447	0.082200343	0.09876034	0.997234826
S7_162766797	7	168269535	0.004825816	0.062639821	447	0.082200343	0.098749957	0.997234826
S2_22241392	2	23532312	0.004844313	0.13310962	447	0.082200343	0.098735404	0.997234826
S6_93337552	6	95997203	0.004850722	0.181208054	447	0.082200343	0.098730375	0.997234826
S7_99206507	7	102313814	0.004865632	0.252796421	447	0.082200343	0.098718703	0.997234826
S4_224072440	4	228399016	0.004868778	0.397091723	447	0.082200343	0.098716244	0.997234826
S3_169045781	3	171641784	0.004874598	0.146532438	447	0.082200343	0.098711701	0.997234826
S3_169045782	3	171641785	0.004874598	0.146532438	447	0.082200343	0.098711701	0.997234826
S3_169045785	3	171641788	0.004874598	0.146532438	447	0.082200343	0.098711701	0.997234826
S7_1956895	7	2087106	0.00487525	0.144295302	447	0.082200343	0.098711192	0.997234826
S5_70782708	5	72794011	0.004875517	0.445190157	447	0.082200343	0.098710984	0.997234826
S1_272840349	1	277649112	0.004876097	0.436241611	447	0.082200343	0.098710531	0.997234826
S5_74621508	5	76823792	0.004887271	0.289709172	447	0.082200343	0.098701826	0.997234826
S10_76950127	10	76305633	0.004889911	0.431767338	447	0.082200343	0.098699772	0.997234826
S4_197716162	4	202008339	0.004890726	0.189038031	447	0.082200343	0.098699139	0.997234826
S2_41306923	2	43092463	0.004901651	0.350111857	447	0.082200343	0.098690653	0.997234826
S2_41306941	2	43092481	0.004901651	0.350111857	447	0.082200343	0.098690653	0.997234826
S6_30805255	6	32280151	0.004909322	0.477628635	447	0.082200343	0.098684707	0.997234826
S8_19834047	8	20528336	0.004911489	0.440715884	447	0.082200343	0.098683029	0.997234826
S1_43138398	1	43361042	0.004916175	0.466442953	447	0.082200343	0.098679402	0.997234826
S2_215946945	2	222725395	0.004926329	0.406040268	447	0.082200343	0.098671557	0.997234826
S4_185386018	4	188826590	0.004931631	0.119686801	447	0.082200343	0.098667467	0.997234826
S1_216692387	1	219873786	0.004935366	0.359060403	447	0.082200343	0.098664589	0.997234826
S4_182573079	4	185927550	0.00494322	0.425055928	447	0.082200343	0.098658543	0.997234826
S1_275044548	1	279936225	0.00495554	0.440715884	447	0.082200343	0.098649079	0.997234826
S1_275044559	1	279936236	0.00495554	0.440715884	447	0.082200343	0.098649079	0.997234826
S1_278053884	1	283086812	0.004955597	0.269574944	447	0.082200343	0.098649035	0.997234826
S6_103637044	6	106936879	0.004958098	0.46196868	447	0.082200343	0.098647117	0.997234826
S2_18133100	2	19342200	0.004962842	0.445190157	447	0.082200343	0.098643481	0.997234826
S10_134056001	10	135305504	0.004965355	0.402684564	447	0.082200343	0.098641557	0.997234826
S3_26717174	3	26250860	0.004971005	0.44295302	447	0.082200343	0.098637234	0.997234826
S2_229120580	2	236202665	0.004971156	0.27852349	447	0.082200343	0.098637118	0.997234826
S3_28338734	3	27958185	0.004983763	0.163310962	447	0.082200343	0.09862749	0.997234826
S1_12977014	1	13167170	0.004986927	0.484340045	447	0.082200343	0.098625077	0.997234826
S8_19857681	8	20552008	0.004989796	0.465324385	447	0.082200343	0.098622891	0.997234826
S8_19857682	8	20552009	0.004989796	0.465324385	447	0.082200343	0.098622891	0.997234826
S1_4608045	1	4725875	0.004992642	0.265100671	447	0.082200343	0.098620724	0.997234826
S6_88117242	6	90930822	0.004997318	0.073825503	447	0.082200343	0.098617165	0.997234826
S5_127605426	5	130950502	0.004998012	0.332214765	447	0.082200343	0.098616638	0.997234826
S1_213097629	1	216170753	0.005001268	0.073825503	447	0.082200343	0.098614162	0.997234826
S1_208315860	1	211270040	0.005002472	0.331096197	447	0.082200343	0.098613247	0.997234826
S1_158476657	1	159882241	0.005004248	0.334451902	447	0.082200343	0.098611898	0.997234826
S5_73036171	5	75184936	0.005005477	0.407158837	447	0.082200343	0.098610965	0.997234826
S3_131956028	3	132564553	0.005008255	0.332214765	447	0.082200343	0.098608856	0.997234826
S9_142297158	9	144964414	0.005008927	0.090604027	447	0.082200343	0.098608346	0.997234826
S5_70063077	5	72057989	0.005015789	0.444071588	447	0.082200343	0.098603143	0.997234826
S9_13460276	9	13119127	0.005017465	0.153243848	447	0.082200343	0.098601873	0.997234826
S7_116282052	7	119721746	0.005019481	0.359060403	447	0.082200343	0.098600346	0.997234826
S3_135440203	3	136133399	0.005021755	0.399328859	447	0.082200343	0.098598624	0.997234826
S8_114427075	8	117173341	0.005024895	0.321029083	447	0.082200343	0.098596249	0.997234826
S1_37124918	1	37493673	0.00502542	0.391498881	447	0.082200343	0.098595852	0.997234826
S10_148294043	10	149083164	0.005026004	0.093959732	447	0.082200343	0.09859541	0.997234826
S7_162989048	7	168434188	0.005034189	0.371364653	447	0.082200343	0.098589226	0.997234826
S5_204064986	5	209501227	0.005036364	0.340044743	447	0.082200343	0.098587584	0.997234826
S9_137552412	9	140138646	0.005044507	0.379194631	447	0.082200343	0.098581445	0.997234826
S5_215496477	5	221353275	0.005047813	0.219239374	447	0.082200343	0.098578955	0.997234826
S9_108345729	9	110938699	0.005057025	0.308724832	447	0.082200343	0.098572027	0.997234826
S5_74917789	5	77126189	0.005069722	0.222595078	447	0.082200343	0.098562498	0.997234826
S9_15610210	9	15348847	0.005081863	0.085011186	447	0.082200343	0.098553409	0.997234826
S1_283088923	1	288177718	0.005082441	0.11409396	447	0.082200343	0.098552977	0.997234826
S7_132169597	7	136251022	0.005088239	0.338926174	447	0.082200343	0.098548645	0.997234826
S6_147525751	6	151582340	0.005093078	0.495525727	447	0.082200343	0.098545034	0.997234826
S7_5338387	7	5673884	0.005095584	0.439597315	447	0.082200343	0.098543165	0.997234826
S7_5338397	7	5673894	0.005095584	0.439597315	447	0.082200343	0.098543165	0.997234826
S3_229865999	3	233811237	0.005097756	0.102908277	447	0.082200343	0.098541545	0.997234826
S8_5911832	8	6171667	0.005100293	0.092841163	447	0.082200343	0.098539655	0.997234826
S6_95327884	6	98078226	0.005107187	0.391498881	447	0.082200343	0.098534523	0.997234826
S1_58963865	1	59662351	0.005110857	0.398210291	447	0.082200343	0.098531794	0.997234826
S1_59070028	1	59768727	0.005121392	0.234899329	447	0.082200343	0.098523972	0.997234826
S3_221568717	3	225334035	0.00512601	0.081655481	447	0.082200343	0.098520547	0.997234826
S5_65457423	5	67364561	0.005139474	0.361297539	447	0.082200343	0.098510583	0.997234826
S9_18335130	9	18181860	0.00514369	0.272930649	447	0.082200343	0.098507468	0.997234826
S2_228985479	2	236089291	0.005158522	0.205816555	447	0.082200343	0.098496532	0.997234826
S5_129223796	5	132638571	0.005158903	0.203579418	447	0.082200343	0.098496251	0.997234826
S2_7953159	2	8139474	0.005165344	0.488814318	447	0.082200343	0.098491512	0.997234826
S1_226312434	1	229902621	0.00518371	0.318791946	447	0.082200343	0.098478031	0.997234826
S7_38895249	7	40264981	0.005184244	0.406040268	447	0.082200343	0.09847764	0.997234826
S2_217353601	2	224131359	0.005193115	0.401565996	447	0.082200343	0.098471148	0.997234826
S7_129971625	7	134006491	0.005196435	0.10738255	447	0.082200343	0.09846872	0.997234826
S7_129971644	7	134006510	0.005196435	0.10738255	447	0.082200343	0.09846872	0.997234826
S2_208329772	2	215158075	0.00520308	0.250559284	447	0.082200343	0.098463867	0.997234826
S5_167598053	5	171558532	0.00520959	0.137583893	447	0.082200343	0.098459119	0.997234826
S5_206250799	5	211875130	0.005236042	0.161073826	447	0.082200343	0.098439887	0.997234826
S5_175600483	5	179626531	0.005237935	0.409395973	447	0.082200343	0.098438515	0.997234826
S2_17572453	2	18790901	0.005238738	0.054809843	447	0.082200343	0.098437933	0.997234826
S2_10788551	2	10908939	0.005242161	0.217002237	447	0.082200343	0.098435453	0.997234826
S6_34524695	6	36057286	0.005242879	0.219239374	447	0.082200343	0.098434933	0.997234826
S1_9191388	1	9232044	0.005245306	0.241610738	447	0.082200343	0.098433175	0.997234826
S2_44443991	2	46299837	0.005245542	0.370246085	447	0.082200343	0.098433005	0.997234826
S1_202444430	1	204956923	0.005247045	0.258389262	447	0.082200343	0.098431917	0.997234826
S5_191129044	5	196487358	0.00524759	0.091722595	447	0.082200343	0.098431523	0.997234826
S1_10844912	1	11011547	0.005250797	0.184563758	447	0.082200343	0.098429203	0.997234826
S1_173213358	1	175150258	0.00525422	0.46196868	447	0.082200343	0.098426729	0.997234826
S5_60997755	5	62835651	0.005261114	0.365771812	447	0.082200343	0.098421751	0.997234826
S8_6480667	8	6820390	0.005269142	0.0950783	447	0.082200343	0.098415962	0.997234826
S7_112971361	7	116258907	0.005270183	0.201342282	447	0.082200343	0.098415212	0.997234826
S7_112971372	7	116258918	0.005270183	0.201342282	447	0.082200343	0.098415212	0.997234826
S5_81860704	5	84029071	0.005277147	0.194630872	447	0.082200343	0.0984102	0.997234826
S5_28064818	5	28754925	0.005279865	0.149888143	447	0.082200343	0.098408245	0.997234826
S5_212818890	5	218657470	0.005283649	0.456375839	447	0.082200343	0.098405525	0.997234826
S5_180407863	5	184891526	0.005285689	0.317673378	447	0.082200343	0.098404059	0.997234826
S3_220901895	3	224641651	0.005291872	0.130872483	447	0.082200343	0.098399621	0.997234826
S2_216629969	2	223403678	0.005296149	0.474272931	447	0.082200343	0.098396555	0.997234826
S3_167437391	3	170097575	0.005296665	0.232662192	447	0.082200343	0.098396185	0.997234826
S9_153841308	9	156989093	0.005311645	0.129753915	447	0.082200343	0.098385465	0.997234826
S5_48803409	5	50364255	0.005317497	0.060402685	447	0.082200343	0.098381286	0.997234826
S8_101118280	8	103152631	0.005320938	0.407158837	447	0.082200343	0.09837883	0.997234826
S6_56540052	6	59172821	0.005329073	0.496644295	447	0.082200343	0.098373032	0.997234826
S5_137853403	5	141199052	0.005336364	0.356823266	447	0.082200343	0.098367843	0.997234826
S3_131134609	3	131681301	0.005340336	0.440715884	447	0.082200343	0.098365019	0.997234826
S8_169192012	8	174417738	0.005352911	0.083892617	447	0.082200343	0.098356093	0.997234826
S3_220747697	3	224486656	0.005368761	0.054809843	447	0.082200343	0.098344874	0.997234826
S1_59072179	1	59770878	0.0053747	0.398210291	447	0.082200343	0.098340678	0.997234826
S9_77547929	9	80618537	0.005383636	0.359060403	447	0.082200343	0.098334375	0.997234826
S3_28008323	3	27601507	0.005386929	0.24049217	447	0.082200343	0.098332054	0.997234826
S6_93882043	6	96584231	0.005387742	0.318791946	447	0.082200343	0.098331481	0.997234826
S3_83483060	3	83904074	0.005410442	0.140939597	447	0.082200343	0.098315529	0.997234826
S7_129964044	7	133998910	0.005413833	0.33557047	447	0.082200343	0.098313152	0.997234826
S7_77594913	7	80235611	0.005414203	0.427293065	447	0.082200343	0.098312893	0.997234826
S2_2088389	2	2085428	0.005424162	0.29753915	447	0.082200343	0.09830592	0.997234826
S2_2088392	2	2085431	0.005424162	0.29753915	447	0.082200343	0.09830592	0.997234826
S2_236440432	2	240639719	0.005427983	0.429530201	447	0.082200343	0.098303249	0.997234826
S2_236440466	2	240639753	0.005427983	0.429530201	447	0.082200343	0.098303249	0.997234826
S9_136146474	9	138715298	0.005428404	0.493288591	447	0.082200343	0.098302955	0.997234826
S1_276310139	1	281231844	0.005429733	0.220357942	447	0.082200343	0.098302026	0.997234826
S1_276310140	1	281231845	0.005429733	0.220357942	447	0.082200343	0.098302026	0.997234826
S4_4996105	4	5753188	0.00543064	0.199105145	447	0.082200343	0.098301393	0.997234826
S1_223688082	1	227288427	0.005438166	0.343400447	447	0.082200343	0.098296139	0.997234826
S7_99384198	7	102492792	0.005441465	0.17114094	447	0.082200343	0.098293838	0.997234826
S5_194255067	5	199688013	0.005452714	0.228187919	447	0.082200343	0.098286005	0.997234826
S2_2550300	2	2564221	0.005455253	0.331096197	447	0.082200343	0.098284239	0.997234826
S3_12426933	3	11701266	0.005461969	0.307606264	447	0.082200343	0.098279572	0.997234826
S1_200724289	1	203222618	0.0054679	0.439597315	447	0.082200343	0.098275455	0.997234826
S8_22797425	8	23525339	0.005478849	0.110738255	447	0.082200343	0.098267867	0.997234826
S5_45591012	5	46968441	0.005485834	0.135346756	447	0.082200343	0.098263035	0.997234826
S4_156393833	4	159920717	0.00549164	0.469798658	447	0.082200343	0.098259023	0.997234826
S4_195380475	4	199666717	0.005493771	0.215883669	447	0.082200343	0.098257551	0.997234826
S7_38628133	7	39976981	0.005498454	0.403803132	447	0.082200343	0.09825432	0.997234826
S2_4178392	2	4142103	0.005505023	0.346756152	447	0.082200343	0.098249792	0.997234826
S2_84689366	2	86974918	0.005507945	0.182326622	447	0.082200343	0.09824778	0.997234826
S5_131178242	5	134675891	0.005510548	0.267337808	447	0.082200343	0.098245988	0.997234826
S1_219437568	1	222665467	0.005513333	0.472035794	447	0.082200343	0.098244071	0.997234826
S1_219437551	1	222665450	0.005513333	0.472035794	447	0.082200343	0.098244071	0.997234826
S4_190376060	4	194544379	0.005513535	0.451901566	447	0.082200343	0.098243933	0.997234826
S7_4034204	7	4200943	0.005516652	0.458612975	447	0.082200343	0.098241789	0.997234826
S9_154565287	9	157739357	0.005520541	0.444071588	447	0.082200343	0.098239117	0.997234826
S7_76299042	7	78852730	0.005528304	0.129753915	447	0.082200343	0.098233789	0.997234826
S3_148280324	3	149595137	0.005528792	0.351230425	447	0.082200343	0.098233454	0.997234826
S1_30344761	1	30611282	0.005530262	0.217002237	447	0.082200343	0.098232445	0.997234826
S5_45234826	5	46613052	0.005537456	0.444071588	447	0.082200343	0.098227516	0.997234826
S5_45234834	5	46613060	0.005537456	0.444071588	447	0.082200343	0.098227516	0.997234826
S5_45234835	5	46613061	0.005537456	0.444071588	447	0.082200343	0.098227516	0.997234826
S8_163912385	8	168892460	0.005554321	0.238255034	447	0.082200343	0.098215985	0.997234826
S1_213097628	1	216170752	0.005567102	0.227069351	447	0.082200343	0.098207271	0.997234826
S9_153457483	9	156617644	0.005580904	0.212527964	447	0.082200343	0.098197883	0.997234826
S7_12275175	7	12686613	0.005581405	0.475391499	447	0.082200343	0.098197542	0.997234826
S3_3694083	3	2926792	0.005599659	0.299776286	447	0.082200343	0.098185164	0.997234826
S8_106271027	8	108605399	0.005604745	0.419463087	447	0.082200343	0.098181722	0.997234826
S6_25701756	6	27098285	0.005608393	0.261744966	447	0.082200343	0.098179256	0.997234826
S6_25701783	6	27098312	0.005608393	0.261744966	447	0.082200343	0.098179256	0.997234826
S2_94960878	2	97831868	0.005614386	0.082774049	447	0.082200343	0.098175207	0.997234826
S4_5810657	4	6595145	0.005623083	0.418344519	447	0.082200343	0.09816934	0.997234826
S3_219780569	3	223463224	0.005626084	0.438478747	447	0.082200343	0.098167317	0.997234826
S2_12243886	2	12539967	0.005626414	0.137583893	447	0.082200343	0.098167095	0.997234826
S5_68512946	5	70444788	0.005631054	0.307606264	447	0.082200343	0.098163971	0.997234826
S9_153962756	9	157111282	0.005642663	0.416107383	447	0.082200343	0.098156164	0.997234826
S3_1721374	3	1009463	0.005647204	0.455257271	447	0.082200343	0.098153116	0.997234826
S1_11476298	1	11666133	0.005647264	0.414988814	447	0.082200343	0.098153075	0.997234826
S2_209019248	2	215863619	0.005660524	0.338926174	447	0.082200343	0.098144187	0.997234826
S2_5564819	2	5506616	0.005661146	0.378076063	447	0.082200343	0.09814377	0.997234826
S4_153318619	4	156895305	0.005662254	0.431767338	447	0.082200343	0.098143029	0.997234826
S8_164363082	8	169369420	0.005664285	0.319910515	447	0.082200343	0.098141669	0.997234826
S3_184814443	3	187826680	0.005680078	0.383668904	447	0.082200343	0.098131117	0.997234826
S1_216692641	1	219874040	0.005681237	0.305369128	447	0.082200343	0.098130345	0.997234826
S3_215474964	3	219083729	0.005684225	0.321029083	447	0.082200343	0.098128352	0.997234826
S3_12526440	3	11806169	0.005688305	0.077181208	447	0.082200343	0.098125633	0.997234826
S3_173590239	3	176040015	0.00569207	0.135346756	447	0.082200343	0.098123125	0.997234826
S4_56310691	4	58645164	0.005700223	0.37360179	447	0.082200343	0.098117702	0.997234826
S5_165978275	5	169872022	0.005704159	0.360178971	447	0.082200343	0.098115086	0.997234826
S3_126236452	3	126657433	0.005709654	0.336689038	447	0.082200343	0.098111437	0.997234826
S8_141948557	8	146129226	0.005718101	0.397091723	447	0.082200343	0.098105836	0.997234826
S6_88917610	6	91520223	0.005718143	0.420581655	447	0.082200343	0.098105808	0.997234826
S6_53395901	6	55972412	0.005720143	0.134228188	447	0.082200343	0.098104483	0.997234826
S4_186271574	4	189731675	0.005721845	0.340044743	447	0.082200343	0.098103356	0.997234826
S7_153247744	7	158599712	0.005727838	0.410514541	447	0.082200343	0.09809939	0.997234826
S5_130116278	5	133571809	0.005729262	0.406040268	447	0.082200343	0.098098447	0.997234826
S8_173800105	8	179045673	0.005739798	0.32885906	447	0.082200343	0.098091487	0.997234826
S7_15339308	7	15831631	0.005741926	0.476510067	447	0.082200343	0.098090082	0.997234826
S2_5692083	2	5637561	0.005746001	0.125279642	447	0.082200343	0.098087394	0.997234826
S6_25545146	6	26946520	0.005762034	0.154362416	447	0.082200343	0.098076838	0.997234826
S2_104511631	2	107469850	0.005766125	0.4049217	447	0.082200343	0.09807415	0.997234826
S2_130953516	2	135111153	0.005783871	0.391498881	447	0.082200343	0.098062509	0.997234826
S3_13271194	3	12555178	0.005789253	0.049217002	447	0.082200343	0.098058986	0.997234826
S1_58739851	1	59443033	0.005792358	0.395973154	447	0.082200343	0.098056955	0.997234826
S2_188057692	2	193723766	0.005794714	0.294183445	447	0.082200343	0.098055414	0.997234826
S7_76299047	7	78852735	0.005798695	0.130872483	447	0.082200343	0.098052813	0.997234826
S1_33287311	1	33617144	0.005800615	0.319910515	447	0.082200343	0.098051559	0.997234826
S7_82320956	7	85211299	0.005805461	0.323266219	447	0.082200343	0.098048396	0.997234826
S4_17828468	4	19000891	0.00581753	0.134228188	447	0.082200343	0.09804053	0.997234826
S9_19015745	9	18922675	0.005822923	0.117449664	447	0.082200343	0.098037021	0.997234826
S1_293629130	1	299194738	0.005822926	0.143176734	447	0.082200343	0.098037019	0.997234826
S9_77022794	9	80085308	0.005825429	0.375838926	447	0.082200343	0.098035392	0.997234826
S1_59069946	1	59768645	0.005825832	0.25950783	447	0.082200343	0.09803513	0.997234826
S1_3736785	1	3848725	0.005827576	0.117449664	447	0.082200343	0.098033996	0.997234826
S6_163101400	6	167328444	0.005830865	0.285234899	447	0.082200343	0.098031859	0.997234826
S3_184814531	3	187826768	0.005833377	0.362416107	447	0.082200343	0.098030228	0.997234826
S1_253303250	1	258879285	0.005834436	0.473154362	447	0.082200343	0.09802954	0.997234826
S8_36544293	8	37558949	0.005842123	0.074944072	447	0.082200343	0.098024554	0.997234826
S2_44335552	2	46192599	0.005842451	0.426174497	447	0.082200343	0.098024341	0.997234826
S2_99178246	2	102032045	0.005844494	0.280760626	447	0.082200343	0.098023018	0.997234826
S7_100035480	7	103179409	0.005846875	0.210290828	447	0.082200343	0.098021475	0.997234826
S7_68250846	7	70418919	0.005850665	0.459731544	447	0.082200343	0.098019021	0.997234826
S2_206218082	2	213062603	0.005852478	0.439597315	447	0.082200343	0.098017848	0.997234826
S1_98340487	1	100636424	0.005864965	0.079418345	447	0.082200343	0.098009777	0.997234826
S9_153165445	9	156304424	0.00586554	0.296420582	447	0.082200343	0.098009406	0.997234826
S3_4862392	3	4141379	0.005876544	0.375838926	447	0.082200343	0.098002308	0.997234826
S6_24606822	6	25985863	0.005881638	0.381431767	447	0.082200343	0.097999028	0.997234826
S2_4291697	2	4269500	0.005882139	0.422818792	447	0.082200343	0.097998705	0.997234826
S6_56609565	6	59242317	0.005883677	0.434004474	447	0.082200343	0.097997715	0.997234826
S1_280978250	1	286081419	0.005884015	0.280760626	447	0.082200343	0.097997498	0.997234826
S4_177434367	4	180354899	0.005884371	0.441834452	447	0.082200343	0.097997268	0.997234826
S2_5692283	2	5637761	0.005884972	0.092841163	447	0.082200343	0.097996882	0.997234826
S10_76953365	10	76308871	0.005893706	0.413870246	447	0.082200343	0.097991267	0.997234826
S5_69103411	5	71069781	0.005898631	0.46196868	447	0.082200343	0.097988104	0.997234826
S3_12426932	3	11701265	0.005899772	0.306487696	447	0.082200343	0.097987372	0.997234826
S3_181815923	3	184738470	0.005904557	0.158836689	447	0.082200343	0.097984302	0.997234826
S10_143501006	10	144211478	0.005906343	0.451901566	447	0.082200343	0.097983158	0.997234826
S5_101510844	5	104086094	0.005909063	0.436241611	447	0.082200343	0.097981414	0.997234826
S6_81726271	6	84775215	0.005915543	0.116331096	447	0.082200343	0.097977265	0.997234826
S1_22748412	1	23122805	0.005916327	0.172259508	447	0.082200343	0.097976763	0.997234826
S4_7334322	4	8141343	0.005916394	0.482102908	447	0.082200343	0.09797672	0.997234826
S4_335327	4	526635	0.005916811	0.149888143	447	0.082200343	0.097976454	0.997234826
S7_46191176	7	47734321	0.005916903	0.102908277	447	0.082200343	0.097976394	0.997234826
S3_181695529	3	184601598	0.005917499	0.35458613	447	0.082200343	0.097976013	0.997234826
S9_153161506	9	156300486	0.005929098	0.459731544	447	0.082200343	0.0979686	0.997234826
S4_229408875	4	234423786	0.005944649	0.380313199	447	0.082200343	0.097958684	0.997234826
S3_23175398	3	22638658	0.00594653	0.469798658	447	0.082200343	0.097957486	0.997234826
S8_23428586	8	24173317	0.005949865	0.361297539	447	0.082200343	0.097955364	0.997234826
S7_112983789	7	116271335	0.005950698	0.222595078	447	0.082200343	0.097954834	0.997234826
S5_114739560	5	117624197	0.005953122	0.222595078	447	0.082200343	0.097953293	0.997234826
S4_186271611	4	189731712	0.005953174	0.341163311	447	0.082200343	0.09795326	0.997234826
S1_255418760	1	259922157	0.005961968	0.356823266	447	0.082200343	0.097947672	0.997234826
S5_43995637	5	45324921	0.005961972	0.162192394	447	0.082200343	0.09794767	0.997234826
S5_167251868	5	171170489	0.005963052	0.457494407	447	0.082200343	0.097946984	0.997234826
S9_36925685	9	38442643	0.005966082	0.07606264	447	0.082200343	0.097945061	0.997234826
S8_165858643	8	171067479	0.005966503	0.222595078	447	0.082200343	0.097944794	0.997234826
S4_35219657	4	36840635	0.005982317	0.055928412	447	0.082200343	0.097934775	0.997234826
S5_176488090	5	180473140	0.005983918	0.223713647	447	0.082200343	0.097933762	0.997234826
S5_65116186	5	67031507	0.005986196	0.111856823	447	0.082200343	0.097932322	0.997234826
S5_65116188	5	67031509	0.005986196	0.111856823	447	0.082200343	0.097932322	0.997234826
S9_120747803	9	122522874	0.005990556	0.185682327	447	0.082200343	0.097929566	0.997234826
S4_218321090	4	222499591	0.005991552	0.120805369	447	0.082200343	0.097928937	0.997234826
S10_114191430	10	115199120	0.005991721	0.369127517	447	0.082200343	0.09792883	0.997234826
S4_3467191	4	4160654	0.005995194	0.231543624	447	0.082200343	0.097926637	0.997234826
S8_14001478	8	14380135	0.006002887	0.371364653	447	0.082200343	0.097921784	0.997234826
S7_7259159	7	7666666	0.006005225	0.369127517	447	0.082200343	0.09792031	0.997234826
S2_50644477	2	52666072	0.006011236	0.451901566	447	0.082200343	0.097916524	0.997234826
S5_3641141	5	3734423	0.006015715	0.393736018	447	0.082200343	0.097913705	0.997234826
S7_162323924	7	167828409	0.006023213	0.115212528	447	0.082200343	0.097908991	0.997234826
S2_3806646	2	3825593	0.006024484	0.338926174	447	0.082200343	0.097908193	0.997234826
S8_105574881	8	107892752	0.006026151	0.46196868	447	0.082200343	0.097907146	0.997234826
S6_130409924	6	134486969	0.006029721	0.242729306	447	0.082200343	0.097904905	0.997234826
S8_131042192	8	134965169	0.00603892	0.406040268	447	0.082200343	0.097899136	0.997234826
S8_131113115	8	135037727	0.00604238	0.177852349	447	0.082200343	0.097896969	0.997234826
S3_148564082	3	149873742	0.00604253	0.305369128	447	0.082200343	0.097896875	0.997234826
S2_4344314	2	4321581	0.006044561	0.336689038	447	0.082200343	0.097895603	0.997234826
S2_15909173	2	16330877	0.006061113	0.134228188	447	0.082200343	0.097885256	0.997234826
S3_154710765	3	156288772	0.006063096	0.304250559	447	0.082200343	0.097884018	0.997234826
S3_4716125	3	3985173	0.006071161	0.445190157	447	0.082200343	0.097878989	0.997234826
S1_198393454	1	200862786	0.006075398	0.425055928	447	0.082200343	0.09787635	0.997234826
S1_298156910	1	303657274	0.006077491	0.42393736	447	0.082200343	0.097875046	0.997234826
S1_278093171	1	283124667	0.006077906	0.36689038	447	0.082200343	0.097874788	0.997234826
S9_153508917	9	156670153	0.006078255	0.410514541	447	0.082200343	0.09787457	0.997234826
S5_127605415	5	130950491	0.006080142	0.32885906	447	0.082200343	0.097873397	0.997234826
S3_51201855	3	51034355	0.006081664	0.459731544	447	0.082200343	0.097872449	0.997234826
S1_34256189	1	34593162	0.006084519	0.448545861	447	0.082200343	0.097870673	0.997234826
S2_198709591	2	205245770	0.006099647	0.267337808	447	0.082200343	0.097861279	0.997234826
S9_135854710	9	138407839	0.006100224	0.434004474	447	0.082200343	0.097860921	0.997234826
S2_197765958	2	204255227	0.006101548	0.201342282	447	0.082200343	0.0978601	0.997234826
S2_5683192	2	5628670	0.006102523	0.473154362	447	0.082200343	0.097859496	0.997234826
S7_125750697	7	142725925	0.006109203	0.467561521	447	0.082200343	0.097855357	0.997234826
S5_4309044	5	4419472	0.006109513	0.401565996	447	0.082200343	0.097855165	0.997234826
S2_224241759	2	231306795	0.00610981	0.130872483	447	0.082200343	0.097854982	0.997234826
S5_213916149	5	219785384	0.006112089	0.058165548	447	0.082200343	0.097853571	0.997234826
S2_208329758	2	215158061	0.006112791	0.4049217	447	0.082200343	0.097853136	0.997234826
S8_173873027	8	179112862	0.006141917	0.489932886	447	0.082200343	0.097835156	0.997234826
S6_147902342	6	151977042	0.006156056	0.421700224	447	0.082200343	0.097826458	0.997234826
S2_236814339	2	241034315	0.006160483	0.380313199	447	0.082200343	0.09782374	0.997234826
S6_52688241	6	55268029	0.006168324	0.246085011	447	0.082200343	0.097818929	0.997234826
S5_193445687	5	198873655	0.006170402	0.148769575	447	0.082200343	0.097817655	0.997234826
S1_158475197	1	159880781	0.006174247	0.124161074	447	0.082200343	0.097815299	0.997234826
S5_176329142	5	180364555	0.006175303	0.446308725	447	0.082200343	0.097814652	0.997234826
S1_33884428	1	34217546	0.006183888	0.170022371	447	0.082200343	0.097809398	0.997234826
S1_13559501	1	13781834	0.006193605	0.463087248	447	0.082200343	0.09780346	0.997234826
S10_142362967	10	143162459	0.006199278	0.336689038	447	0.082200343	0.097799998	0.997234826
S10_142362969	10	143162461	0.006199278	0.336689038	447	0.082200343	0.097799998	0.997234826
S3_221609488	3	225376126	0.006202125	0.185682327	447	0.082200343	0.097798262	0.997234826
S3_147408022	3	148711710	0.006206556	0.494407159	447	0.082200343	0.097795562	0.997234826
S6_38268238	6	40026324	0.006211696	0.341163311	447	0.082200343	0.097792431	0.997234826
S6_109072785	6	113746063	0.006219901	0.13310962	447	0.082200343	0.09778744	0.997234826
S6_109072790	6	113746068	0.006219901	0.13310962	447	0.082200343	0.09778744	0.997234826
S8_142004889	8	146189710	0.006225559	0.205816555	447	0.082200343	0.097784002	0.997234826
S8_173930112	8	179168831	0.006227696	0.372483221	447	0.082200343	0.097782704	0.997234826
S3_30923244	3	30519937	0.006229832	0.470917226	447	0.082200343	0.097781407	0.997234826
S3_10607855	3	9877935	0.006230883	0.434004474	447	0.082200343	0.097780769	0.997234826
S3_10607873	3	9877953	0.006230883	0.434004474	447	0.082200343	0.097780769	0.997234826
S5_167598052	5	171558531	0.006235425	0.139821029	447	0.082200343	0.097778014	0.997234826
S8_129496637	8	133386564	0.006235699	0.312080537	447	0.082200343	0.097777848	0.997234826
S5_155097778	5	158893694	0.006238144	0.329977629	447	0.082200343	0.097776366	0.997234826
S5_155097782	5	158893698	0.006238144	0.329977629	447	0.082200343	0.097776366	0.997234826
S5_156842119	5	160633318	0.006238761	0.067114094	447	0.082200343	0.097775992	0.997234826
S5_163218286	5	167117739	0.006241643	0.303131991	447	0.082200343	0.097774246	0.997234826
S7_99541525	7	102657445	0.006247335	0.299776286	447	0.082200343	0.097770799	0.997234826
S1_274407485	1	279275346	0.00626263	0.149888143	447	0.082200343	0.097761555	0.997234826
S2_110823817	2	114013623	0.00626936	0.440715884	447	0.082200343	0.097757494	0.997234826
S2_213195215	2	219995976	0.00627241	0.421700224	447	0.082200343	0.097755655	0.997234826
S5_65116189	5	67031510	0.006273084	0.465324385	447	0.082200343	0.097755249	0.997234826
S5_214949557	5	220828651	0.00627323	0.429530201	447	0.082200343	0.097755161	0.997234826
S2_9559500	2	9736290	0.006275584	0.12639821	447	0.082200343	0.097753743	0.997234826
S3_204582376	3	207876187	0.006281785	0.44966443	447	0.082200343	0.097750009	0.997234826
S4_182738366	4	186092811	0.006285458	0.384787472	447	0.082200343	0.097747799	0.997234826
S4_26718643	4	28238503	0.006288313	0.223713647	447	0.082200343	0.097746083	0.997234826
S5_156970106	5	160764332	0.006289904	0.304250559	447	0.082200343	0.097745126	0.997234826
S5_58727581	5	60539533	0.006291701	0.12639821	447	0.082200343	0.097744047	0.997234826
S1_267804979	1	272614768	0.006295162	0.182326622	447	0.082200343	0.097741968	0.997234826
S10_142795178	10	143572850	0.006295348	0.062639821	447	0.082200343	0.097741856	0.997234826
S5_68512410	5	70444252	0.006297565	0.244966443	447	0.082200343	0.097740525	0.997234826
S7_9260253	7	9550987	0.006311884	0.224832215	447	0.082200343	0.09773194	0.997234826
S9_139195639	9	141793613	0.006331788	0.100671141	447	0.082200343	0.09772004	0.997234826
S3_182042778	3	184965295	0.006336017	0.312080537	447	0.082200343	0.097717516	0.997234826
S5_883982	5	920234	0.006338235	0.360178971	447	0.082200343	0.097716193	0.997234826
S4_192791907	4	197113083	0.006339898	0.456375839	447	0.082200343	0.097715202	0.997234826
S5_131456284	5	134792263	0.006340484	0.237136465	447	0.082200343	0.097714853	0.997234826
S8_86403132	8	88064482	0.006342309	0.318791946	447	0.082200343	0.097713765	0.997234826
S9_152528836	9	155674109	0.006345922	0.445190157	447	0.082200343	0.097711612	0.997234826
S9_77024589	9	80086954	0.006347224	0.271812081	447	0.082200343	0.097710837	0.997234826
S2_9316756	2	9499703	0.006349587	0.079418345	447	0.082200343	0.09770943	0.997234826
S3_1602872	3	888967	0.006350289	0.448545861	447	0.082200343	0.097709012	0.997234826
S10_141501151	10	142286973	0.006351508	0.205816555	447	0.082200343	0.097708287	0.997234826
S2_212479102	2	219294995	0.00635782	0.375838926	447	0.082200343	0.097704533	0.997234826
S9_18888260	9	18798261	0.006359735	0.314317673	447	0.082200343	0.097703395	0.997234826
S10_144129625	10	144809444	0.006359915	0.484340045	447	0.082200343	0.097703288	0.997234826
S4_136967701	4	140072421	0.006376723	0.200223714	447	0.082200343	0.097693314	0.997234826
S3_3422104	3	2655469	0.006380947	0.233780761	447	0.082200343	0.097690812	0.997234826
S3_3422108	3	2655473	0.006380947	0.233780761	447	0.082200343	0.097690812	0.997234826
S5_192168677	5	197540994	0.006382324	0.215883669	447	0.082200343	0.097689996	0.997234826
S2_17586162	2	18804610	0.006385275	0.177852349	447	0.082200343	0.097688249	0.997234826
S2_17586165	2	18804613	0.006385275	0.177852349	447	0.082200343	0.097688249	0.997234826
S5_200934594	5	206411184	0.00639111	0.346756152	447	0.082200343	0.097684798	0.997234826
S5_200934610	5	206411200	0.00639111	0.346756152	447	0.082200343	0.097684798	0.997234826
S10_137286374	10	138506263	0.006391931	0.25950783	447	0.082200343	0.097684312	0.997234826
S5_164708623	5	168614696	0.006395153	0.427293065	447	0.082200343	0.097682408	0.997234826
S3_148299049	3	149605225	0.006397942	0.302013423	447	0.082200343	0.097680761	0.997234826
S4_155804822	4	159322549	0.006401275	0.176733781	447	0.082200343	0.097678793	0.997234826
S5_33495240	5	34654115	0.006407465	0.376957494	447	0.082200343	0.097675141	0.997234826
S5_33495254	5	34654129	0.006407465	0.376957494	447	0.082200343	0.097675141	0.997234826
S1_224067781	1	227681157	0.006414117	0.352348993	447	0.082200343	0.09767122	0.997234826
S1_214725370	1	217883977	0.00641565	0.338926174	447	0.082200343	0.097670317	0.997234826
S7_153428338	7	158758709	0.006416239	0.344519016	447	0.082200343	0.09766997	0.997234826
S8_12848474	8	13200478	0.006429488	0.298657718	447	0.082200343	0.097662176	0.997234826
S4_182566905	4	185921376	0.006431719	0.155480984	447	0.082200343	0.097660866	0.997234826
S9_10122890	9	9514571	0.006435132	0.434004474	447	0.082200343	0.097658861	0.997234826
S8_139630910	8	143825421	0.00644187	0.390380313	447	0.082200343	0.097654908	0.997234826
S7_161436268	7	166928536	0.006444406	0.337807606	447	0.082200343	0.097653421	0.997234826
S9_153449834	9	156609995	0.006444979	0.432885906	447	0.082200343	0.097653085	0.997234826
S2_14328082	2	14786646	0.006451586	0.086129754	447	0.082200343	0.097649214	0.997234826
S2_14328083	2	14786647	0.006451586	0.086129754	447	0.082200343	0.097649214	0.997234826
S4_168567900	4	171504486	0.006462477	0.429530201	447	0.082200343	0.097642842	0.997234826
S5_5796175	5	5982078	0.006467744	0.43064877	447	0.082200343	0.097639765	0.997234826
S1_195139545	1	197487582	0.006471065	0.332214765	447	0.082200343	0.097637826	0.997234826
S4_79106236	4	81954187	0.006495611	0.170022371	447	0.082200343	0.097623524	0.997234826
S8_170100671	8	175334553	0.006501684	0.215883669	447	0.082200343	0.097619995	0.997234826
S6_109072791	6	113746069	0.006509743	0.134228188	447	0.082200343	0.097615316	0.997234826
S9_17446033	9	17209767	0.006514274	0.305369128	447	0.082200343	0.097612688	0.997234826
S6_44173035	6	45919527	0.006518935	0.469798658	447	0.082200343	0.097609986	0.997234826
S5_139628027	5	142986618	0.006521118	0.409395973	447	0.082200343	0.097608721	0.997234826
S5_130020160	5	133473158	0.006525147	0.29082774	447	0.082200343	0.097606389	0.997234826
S8_168482092	8	173735630	0.006527568	0.199105145	447	0.082200343	0.097604988	0.997234826
S7_34545421	7	35825010	0.006537133	0.432885906	447	0.082200343	0.097599458	0.997234826
S2_18133278	2	19342378	0.006553878	0.402684564	447	0.082200343	0.097589797	0.997234826
S5_174990017	5	179022208	0.006569607	0.091722595	447	0.082200343	0.097580745	0.997234826
S3_167009656	3	169650273	0.006574976	0.06935123	447	0.082200343	0.09757766	0.997234826
S6_152509426	6	156656586	0.006581673	0.360178971	447	0.082200343	0.097573816	0.997234826
S3_221217423	3	224972138	0.006590267	0.099552573	447	0.082200343	0.097568889	0.997234826
S1_173038650	1	174976434	0.006591172	0.391498881	447	0.082200343	0.097568371	0.997234826
S9_7012781	9	6607342	0.006591669	0.406040268	447	0.082200343	0.097568086	0.997234826
S8_94611050	8	96404679	0.006604728	0.280760626	447	0.082200343	0.097560613	0.997234826
S5_10412313	5	10712144	0.006620501	0.483221477	447	0.082200343	0.097551607	0.997234826
S9_32342715	9	33754121	0.00662271	0.435123043	447	0.082200343	0.097550348	0.997234826
S5_202936337	5	208364079	0.006626242	0.248322148	447	0.082200343	0.097548335	0.997234826
S5_202936338	5	208364080	0.006626242	0.248322148	447	0.082200343	0.097548335	0.997234826
S1_205832364	1	208668876	0.00662659	0.247203579	447	0.082200343	0.097548136	0.997234826
S4_197853577	4	202127949	0.00662671	0.184563758	447	0.082200343	0.097548068	0.997234826
S4_175218470	4	178257727	0.006629631	0.097315436	447	0.082200343	0.097546404	0.997234826
S10_13003426	10	13147940	0.006640722	0.418344519	447	0.082200343	0.097540094	0.997234826
S7_153219266	7	158563869	0.006641175	0.498881432	447	0.082200343	0.097539837	0.997234826
S9_153457473	9	156617634	0.006642248	0.213646532	447	0.082200343	0.097539227	0.997234826
S9_153457476	9	156617637	0.006642248	0.213646532	447	0.082200343	0.097539227	0.997234826
S4_171266527	4	174320631	0.006642433	0.34787472	447	0.082200343	0.097539122	0.997234826
S5_883897	5	920149	0.00664465	0.363534676	447	0.082200343	0.097537862	0.997234826
S5_90344987	5	92672962	0.006653078	0.170022371	447	0.082200343	0.097533077	0.997234826
S5_90344973	5	92672948	0.006653078	0.170022371	447	0.082200343	0.097533077	0.997234826
S4_200873145	4	205273712	0.006653969	0.293064877	447	0.082200343	0.097532571	0.997234826
S7_112946093	7	116233546	0.006657313	0.162192394	447	0.082200343	0.097530674	0.997234826
S6_56453117	6	59082306	0.006658613	0.308724832	447	0.082200343	0.097529937	0.997234826
S6_100083438	6	103272209	0.006659152	0.355704698	447	0.082200343	0.097529632	0.997234826
S6_147906188	6	151980888	0.006659732	0.260626398	447	0.082200343	0.097529303	0.997234826
S4_190051262	4	194256834	0.006661673	0.217002237	447	0.082200343	0.097528203	0.997234826
S5_181971336	5	186556430	0.00666805	0.457494407	447	0.082200343	0.097524592	0.997234826
S3_32126032	3	31721445	0.006668182	0.108501119	447	0.082200343	0.097524517	0.997234826
S5_131363486	5	134676258	0.006674642	0.397091723	447	0.082200343	0.097520861	0.997234826
S4_832988	4	1048402	0.006683801	0.375838926	447	0.082200343	0.097515686	0.997234826
S3_148281809	3	149596622	0.006690016	0.348993289	447	0.082200343	0.097512178	0.997234826
S3_148219993	3	149521779	0.006699558	0.099552573	447	0.082200343	0.097506798	0.997234826
S7_144301219	7	149226457	0.006709626	0.049217002	447	0.082200343	0.097501131	0.997234826
S3_223990349	3	227741012	0.006712126	0.394854586	447	0.082200343	0.097499725	0.997234826
S8_163542240	8	168533273	0.006714799	0.300894855	447	0.082200343	0.097498222	0.997234826
S3_215339383	3	218958326	0.00671513	0.403803132	447	0.082200343	0.097498036	0.997234826
S2_118536002	2	122503900	0.006717755	0.383668904	447	0.082200343	0.097496561	0.997234826
S6_1341040	6	1392610	0.006724065	0.065995526	447	0.082200343	0.097493018	0.997234826
S8_164363096	8	169369434	0.00674369	0.286353468	447	0.082200343	0.09748202	0.997234826
S7_102629211	7	105832542	0.006745575	0.231543624	447	0.082200343	0.097480965	0.997234826
S10_133413397	10	134653029	0.006751458	0.155480984	447	0.082200343	0.097477676	0.997234826
S8_124797091	8	128194787	0.006753732	0.130872483	447	0.082200343	0.097476405	0.997234826
S1_10222600	1	10349555	0.006757666	0.313199105	447	0.082200343	0.097474207	0.997234826
S9_137634501	9	140221413	0.006758403	0.475391499	447	0.082200343	0.097473796	0.997234826
S2_6005143	2	5954418	0.006760133	0.32885906	447	0.082200343	0.09747283	0.997234826
S1_94820789	1	97046454	0.006774613	0.159955257	447	0.082200343	0.097464756	0.997234826
S5_199376110	5	204687602	0.00677909	0.326621924	447	0.082200343	0.097462264	0.997234826
S5_33821927	5	34991298	0.006783389	0.466442953	447	0.082200343	0.097459872	0.997234826
S10_4098825	10	3801056	0.006786497	0.445190157	447	0.082200343	0.097458143	0.997234826
S4_13814861	4	14627077	0.006788118	0.448545861	447	0.082200343	0.097457242	0.997234826
S6_109072780	6	113746058	0.006798452	0.135346756	447	0.082200343	0.097451503	0.997234826
S6_27110692	6	28514591	0.006799055	0.228187919	447	0.082200343	0.097451168	0.997234826
S1_183811530	1	185881194	0.006803564	0.228187919	447	0.082200343	0.097448667	0.997234826
S3_125548517	3	125970541	0.006805087	0.475391499	447	0.082200343	0.097447822	0.997234826
S1_33267218	1	33597051	0.006812229	0.24049217	447	0.082200343	0.097443865	0.997234826
S1_33267213	1	33597046	0.006812229	0.24049217	447	0.082200343	0.097443865	0.997234826
S9_17472535	9	17239525	0.00681636	0.360178971	447	0.082200343	0.097441578	0.997234826
S8_24522939	8	25303681	0.006816939	0.174496644	447	0.082200343	0.097441258	0.997234826
S9_136088993	9	138658009	0.006819499	0.317673378	447	0.082200343	0.097439841	0.997234826
S3_173472369	3	175917021	0.006822939	0.455257271	447	0.082200343	0.097437939	0.997234826
S4_50159391	4	52311148	0.006824275	0.280760626	447	0.082200343	0.0974372	0.997234826
S2_226378573	2	233405177	0.006832973	0.158836689	447	0.082200343	0.097432395	0.997234826
S3_213795033	3	217471036	0.006834015	0.104026846	447	0.082200343	0.097431819	0.997234826
S3_201560637	3	204747301	0.006837083	0.460850112	447	0.082200343	0.097430126	0.997234826
S7_160778590	7	166260308	0.006838111	0.428411633	447	0.082200343	0.097429559	0.997234826
S10_4021191	10	3619805	0.006843869	0.450782998	447	0.082200343	0.097426384	0.997234826
S3_178410144	3	181231215	0.006851595	0.321029083	447	0.082200343	0.097422128	0.997234826
S5_56746209	5	58560992	0.00685356	0.086129754	447	0.082200343	0.097421047	0.997234826
S10_7132971	10	6936308	0.006866402	0.400447427	447	0.082200343	0.097413986	0.997234826
S4_190051265	4	194256837	0.006872496	0.232662192	447	0.082200343	0.097410639	0.997234826
S1_265652951	1	270460812	0.006873644	0.412751678	447	0.082200343	0.097410009	0.997234826
S2_234023817	2	242167487	0.006875642	0.483221477	447	0.082200343	0.097408913	0.997234826
S5_92709566	5	95087235	0.006891499	0.275167785	447	0.082200343	0.097400225	0.997234826
S1_6542574	1	6535265	0.006892542	0.44295302	447	0.082200343	0.097399654	0.997234826
S4_61413726	4	63837449	0.006900385	0.444071588	447	0.082200343	0.097395365	0.997234826
S9_26613303	9	26667651	0.006905327	0.460850112	447	0.082200343	0.097392665	0.997234826
S2_203919140	2	210476803	0.006908739	0.206935123	447	0.082200343	0.097390802	0.997234826
S9_153520158	9	156681394	0.006920758	0.363534676	447	0.082200343	0.097384247	0.997234826
S4_21584328	4	22850966	0.006921869	0.458612975	447	0.082200343	0.097383642	0.997234826
S7_76299883	7	78853571	0.006928301	0.098434004	447	0.082200343	0.097380139	0.997234826
S6_145649612	6	149722327	0.006937802	0.061521253	447	0.082200343	0.097374971	0.997234826
S1_198739658	1	201196141	0.006940997	0.249440716	447	0.082200343	0.097373235	0.997234826
S5_6113159	5	6349033	0.00695155	0.119686801	447	0.082200343	0.097367506	0.997234826
S2_2088391	2	2085430	0.006954658	0.300894855	447	0.082200343	0.097365821	0.997234826
S7_62504430	7	69988391	0.006970647	0.456375839	447	0.082200343	0.097357162	0.997234826
S8_173340263	8	178636309	0.006972037	0.459731544	447	0.082200343	0.09735641	0.997234826
S7_18428127	7	19096234	0.006972788	0.250559284	447	0.082200343	0.097356004	0.997234826
S1_198198976	1	200653834	0.006976396	0.318791946	447	0.082200343	0.097354054	0.997234826
S1_10995509	1	11161745	0.006985421	0.472035794	447	0.082200343	0.097349179	0.997234826
S8_139014816	8	143160563	0.00700553	0.063758389	447	0.082200343	0.097338342	0.997234826
S3_147590305	3	148888409	0.007012722	0.241610738	447	0.082200343	0.097334474	0.997234826
S5_5548361	5	5731241	0.00701947	0.476510067	447	0.082200343	0.097330848	0.997234826
S5_179588095	5	183935887	0.007043528	0.372483221	447	0.082200343	0.09731795	0.997234826
S3_164898587	3	167537903	0.007049054	0.451901566	447	0.082200343	0.097314994	0.997234826
S4_166927337	4	169880069	0.007049434	0.399328859	447	0.082200343	0.097314791	0.997234826
S4_56970393	4	59299376	0.007054483	0.388143177	447	0.082200343	0.097312092	0.997234826
S8_172756815	8	178058606	0.007059685	0.067114094	447	0.082200343	0.097309314	0.997234826
S8_164811162	8	170004913	0.007060532	0.445190157	447	0.082200343	0.097308862	0.997234826
S10_1905273	10	1464193	0.00707607	0.119686801	447	0.082200343	0.097300576	0.997234826
S10_114770692	10	115787021	0.00708405	0.135346756	447	0.082200343	0.097296328	0.997234826
S6_24604489	6	25983530	0.007088134	0.343400447	447	0.082200343	0.097294156	0.997234826
S4_198405818	4	202738205	0.007091077	0.181208054	447	0.082200343	0.097292591	0.997234826
S4_31578798	4	33189998	0.007091586	0.336689038	447	0.082200343	0.097292321	0.997234826
S7_112946103	7	116233556	0.007095125	0.161073826	447	0.082200343	0.097290441	0.997234826
S1_178424266	1	180394307	0.007098924	0.168903803	447	0.082200343	0.097288424	0.997234826
S4_194846271	4	199119739	0.007099334	0.458612975	447	0.082200343	0.097288205	0.997234826
S8_157958899	8	162775849	0.007105371	0.298657718	447	0.082200343	0.097285003	0.997234826
S5_114770798	5	117650632	0.007106211	0.223713647	447	0.082200343	0.097284557	0.997234826
S6_156762323	6	160910453	0.007110906	0.086129754	447	0.082200343	0.097282068	0.997234826
S1_59122249	1	59847417	0.007110976	0.158836689	447	0.082200343	0.097282031	0.997234826
S5_204517746	5	209973242	0.007112747	0.325503356	447	0.082200343	0.097281092	0.997234826
S6_104759005	6	108112341	0.007130028	0.402684564	447	0.082200343	0.097271948	0.997234826
S2_12099356	2	12403225	0.007132633	0.429530201	447	0.082200343	0.097270571	0.997234826
S1_195758536	1	198119308	0.007132734	0.280760626	447	0.082200343	0.097270518	0.997234826
S3_105997367	3	91899362	0.007137487	0.119686801	447	0.082200343	0.097268008	0.997234826
S9_31480452	9	31624925	0.007140017	0.212527964	447	0.082200343	0.097266672	0.997234826
S10_139035961	10	140289014	0.007140267	0.243847875	447	0.082200343	0.09726654	0.997234826
S9_154331674	9	157487226	0.007143964	0.262863535	447	0.082200343	0.09726459	0.997234826
S5_8613150	5	8966939	0.007147548	0.334451902	447	0.082200343	0.0972627	0.997234826
S5_204529006	5	209984494	0.007156721	0.269574944	447	0.082200343	0.097257868	0.997234826
S10_15393034	10	15719753	0.007158638	0.304250559	447	0.082200343	0.097256859	0.997234826
S4_181061526	4	183999202	0.007163539	0.464205817	447	0.082200343	0.09725428	0.997234826
S3_225037288	3	228816028	0.007166112	0.363534676	447	0.082200343	0.097252927	0.997234826
S4_157554492	4	161034543	0.00716911	0.357941834	447	0.082200343	0.097251351	0.997234826
S6_27031513	6	28425667	0.007170866	0.204697987	447	0.082200343	0.097250428	0.997234826
S7_99541203	7	102657123	0.00717341	0.34787472	447	0.082200343	0.097249091	0.997234826
S7_99541204	7	102657124	0.00717341	0.34787472	447	0.082200343	0.097249091	0.997234826
S5_164887446	5	168790941	0.007177926	0.426174497	447	0.082200343	0.09724672	0.997234826
S7_18227327	7	18878477	0.007178572	0.444071588	447	0.082200343	0.097246381	0.997234826
S6_163102047	6	167329091	0.007181841	0.210290828	447	0.082200343	0.097244666	0.997234826
S7_76299656	7	78853344	0.007183962	0.10738255	447	0.082200343	0.097243553	0.997234826
S1_129633920	1	131944720	0.007188283	0.239373602	447	0.082200343	0.097241288	0.997234826
S2_13309527	2	13601627	0.007204152	0.383668904	447	0.082200343	0.09723298	0.997234826
S1_48554047	1	48957494	0.007204351	0.438478747	447	0.082200343	0.097232876	0.997234826
S2_213195241	2	219996002	0.007205987	0.438478747	447	0.082200343	0.097232021	0.997234826
S5_85931325	5	88225195	0.007206432	0.280760626	447	0.082200343	0.097231788	0.997234826
S9_101332602	9	104801947	0.007206684	0.276286353	447	0.082200343	0.097231657	0.997234826
S8_169192148	8	174417874	0.007211874	0.315436242	447	0.082200343	0.097228945	0.997234826
S8_114427060	8	117173326	0.007214471	0.400447427	447	0.082200343	0.097227588	0.997234826
S5_65116185	5	67031506	0.007216509	0.112975391	447	0.082200343	0.097226524	0.997234826
S2_191003187	2	196699691	0.007219721	0.413870246	447	0.082200343	0.097224848	0.997234826
S3_4667227	3	3936284	0.007220164	0.37360179	447	0.082200343	0.097224616	0.997234826
S9_136770318	9	139353901	0.007231195	0.436241611	447	0.082200343	0.097218866	0.997234826
S4_32251550	4	33819990	0.007235759	0.440715884	447	0.082200343	0.097216489	0.997234826
S1_206711031	1	209544099	0.007236079	0.378076063	447	0.082200343	0.097216323	0.997234826
S5_4102006	5	4210465	0.007242042	0.450782998	447	0.082200343	0.09721322	0.997234826
S7_155738564	7	161103043	0.007243845	0.229306488	447	0.082200343	0.097212282	0.997234826
S3_154373242	3	155807332	0.007246801	0.236017897	447	0.082200343	0.097210745	0.997234826
S1_260955530	1	265788441	0.007248427	0.308724832	447	0.082200343	0.0972099	0.997234826
S2_209019019	2	215863390	0.007258265	0.348993289	447	0.082200343	0.097204792	0.997234826
S8_163912440	8	168892515	0.007260094	0.361297539	447	0.082200343	0.097203843	0.997234826
S1_267665162	1	272472227	0.007262796	0.463087248	447	0.082200343	0.097202441	0.997234826
S7_155591067	7	160899688	0.007267311	0.200223714	447	0.082200343	0.0972001	0.997234826
S1_81786993	1	83420650	0.007270271	0.39261745	447	0.082200343	0.097198567	0.997234826
S2_14328114	2	14786678	0.007282572	0.083892617	447	0.082200343	0.0971922	0.997234826
S10_109379278	10	110237844	0.007284583	0.400447427	447	0.082200343	0.09719116	0.997234826
S3_221539990	3	225305541	0.007286104	0.282997763	447	0.082200343	0.097190373	0.997234826
S3_9422711	3	8651428	0.007287635	0.426174497	447	0.082200343	0.097189582	0.997234826
S3_219828725	3	223520312	0.007290128	0.395973154	447	0.082200343	0.097188294	0.997234826
S3_9421172	3	8649889	0.007292658	0.134228188	447	0.082200343	0.097186987	0.997234826
S9_8429211	9	8114226	0.007302261	0.318791946	447	0.082200343	0.097182032	0.997234826
S4_198385728	4	202687371	0.007308779	0.44966443	447	0.082200343	0.097178671	0.997234826
S1_211621970	1	214675930	0.007310505	0.388143177	447	0.082200343	0.097177782	0.997234826
S5_130020157	5	133473155	0.007311575	0.416107383	447	0.082200343	0.097177231	0.997234826
S6_153235784	6	157410804	0.007312552	0.414988814	447	0.082200343	0.097176728	0.997234826
S1_37315186	1	37678511	0.007315463	0.390380313	447	0.082200343	0.097175229	0.997234826
S1_224102177	1	227715548	0.007330608	0.325503356	447	0.082200343	0.097167441	0.997234826
S10_4433353	10	4039329	0.007337238	0.468680089	447	0.082200343	0.097164037	0.997234826
S8_13441783	8	13779765	0.007349371	0.159955257	447	0.082200343	0.097157816	0.997234826
S1_229094179	1	232587695	0.007353418	0.233780761	447	0.082200343	0.097155743	0.997234826
S7_154609034	7	159934235	0.007358308	0.463087248	447	0.082200343	0.09715324	0.997234826
S6_164684827	6	168829167	0.007360172	0.451901566	447	0.082200343	0.097152286	0.997234826
S1_3554897	1	3651488	0.007361362	0.165548098	447	0.082200343	0.097151678	0.997234826
S3_183638823	3	186600006	0.007362084	0.429530201	447	0.082200343	0.097151308	0.997234826
S3_147407973	3	148711661	0.007365185	0.265100671	447	0.082200343	0.097149723	0.997234826
S2_5683180	2	5628658	0.007365541	0.474272931	447	0.082200343	0.097149541	0.997234826
S2_5924328	2	5872467	0.007368795	0.453020134	447	0.082200343	0.097147878	0.997234826
S10_12926952	10	13074919	0.007370029	0.426174497	447	0.082200343	0.097147247	0.997234826
S6_161722556	6	165905106	0.00738158	0.412751678	447	0.082200343	0.097141351	0.997234826
S4_23951666	4	25532310	0.007386893	0.276286353	447	0.082200343	0.097138642	0.997234826
S3_135757972	3	136455405	0.007394961	0.414988814	447	0.082200343	0.097134533	0.997234826
S7_129965438	7	134000304	0.007399484	0.435123043	447	0.082200343	0.097132231	0.997234826
S2_2059929	2	2056968	0.007407693	0.457494407	447	0.082200343	0.097128056	0.997234826
S3_148281812	3	149596625	0.007409354	0.350111857	447	0.082200343	0.097127213	0.997234826
S4_187278007	4	190743068	0.007409619	0.492170022	447	0.082200343	0.097127078	0.997234826
S1_100903732	1	103280347	0.007413786	0.321029083	447	0.082200343	0.097124962	0.997234826
S2_4206672	2	4172920	0.007414647	0.445190157	447	0.082200343	0.097124524	0.997234826
S6_128237788	6	132240277	0.007416609	0.085011186	447	0.082200343	0.097123528	0.997234826
S1_223770816	1	227373416	0.007426212	0.284116331	447	0.082200343	0.097118658	0.997234826
S9_32583874	9	34000169	0.007426319	0.308724832	447	0.082200343	0.097118603	0.997234826
S3_27982639	3	27575824	0.007432641	0.265100671	447	0.082200343	0.0971154	0.997234826
S6_150308648	6	154396876	0.00743549	0.460850112	447	0.082200343	0.097113958	0.997234826
S3_208035592	3	211590661	0.007435841	0.242729306	447	0.082200343	0.09711378	0.997234826
S1_19328217	1	19700693	0.007438573	0.476510067	447	0.082200343	0.097112397	0.997234826
S8_164363301	8	169369639	0.00743902	0.270693512	447	0.082200343	0.097112171	0.997234826
S2_5924327	2	5872466	0.007441017	0.454138702	447	0.082200343	0.097111161	0.997234826
S5_178352378	5	182432389	0.00744162	0.326621924	447	0.082200343	0.097110856	0.997234826
S2_45196621	2	47109725	0.007445374	0.298657718	447	0.082200343	0.097108957	0.997234826
S5_194255376	5	199688322	0.007449814	0.159955257	447	0.082200343	0.097106713	0.997234826
S1_4053280	1	4133628	0.007453055	0.079418345	447	0.082200343	0.097105076	0.997234826
S8_28116230	8	29050371	0.007466434	0.08836689	447	0.082200343	0.097098326	0.997234826
S6_161722510	6	165905060	0.007467554	0.340044743	447	0.082200343	0.097097761	0.997234826
S3_218031621	3	221642065	0.00746764	0.071588367	447	0.082200343	0.097097718	0.997234826
S3_2156904	3	1480625	0.007472313	0.427293065	447	0.082200343	0.097095364	0.997234826
S5_215841620	5	221711848	0.007475526	0.379194631	447	0.082200343	0.097093745	0.997234826
S1_297910173	1	303404929	0.007483472	0.436241611	447	0.082200343	0.097089747	0.997234826
S2_107417878	2	110448969	0.007488475	0.420581655	447	0.082200343	0.097087232	0.997234826
S1_213098205	1	216171329	0.007496033	0.272930649	447	0.082200343	0.097083436	0.997234826
S9_86297879	9	89630109	0.007498525	0.35458613	447	0.082200343	0.097082184	0.997234826
S9_86297882	9	89630112	0.007498525	0.35458613	447	0.082200343	0.097082184	0.997234826
S6_161725874	6	165908425	0.007499988	0.364653244	447	0.082200343	0.09708145	0.997234826
S7_155070876	7	160397523	0.007502739	0.208053691	447	0.082200343	0.09708007	0.997234826
S8_10092318	8	10459907	0.007510094	0.436241611	447	0.082200343	0.097076383	0.997234826
S3_22304072	3	21793585	0.007515396	0.212527964	447	0.082200343	0.097073727	0.997234826
S8_36552955	8	37567610	0.00753522	0.342281879	447	0.082200343	0.097063815	0.997234826
S6_31649682	6	33143782	0.007543565	0.285234899	447	0.082200343	0.09705965	0.997234826
S3_149991745	3	151280528	0.007546347	0.336689038	447	0.082200343	0.097058262	0.997234826
S1_72112813	1	73454036	0.007552213	0.322147651	447	0.082200343	0.097055338	0.997234826
S2_102618789	2	105543623	0.007554046	0.227069351	447	0.082200343	0.097054425	0.997234826
S7_160023385	7	165496250	0.007557147	0.39261745	447	0.082200343	0.097052881	0.997234826
S6_34524599	6	36057190	0.007565714	0.261744966	447	0.082200343	0.097048618	0.997234826
S3_215475011	3	219083776	0.007570721	0.31655481	447	0.082200343	0.097046129	0.997234826
S4_31848997	4	33452520	0.00757518	0.446308725	447	0.082200343	0.097043914	0.997234826
S10_1916666	10	1475586	0.00758134	0.429530201	447	0.082200343	0.097040855	0.997234826
S6_130966820	6	135056700	0.007582902	0.323266219	447	0.082200343	0.09704008	0.997234826
S6_24184909	6	25565002	0.007586735	0.234899329	447	0.082200343	0.097038179	0.997234826
S5_192151957	5	197522603	0.007587752	0.326621924	447	0.082200343	0.097037675	0.997234826
S5_203043988	5	208468621	0.00759474	0.436241611	447	0.082200343	0.097034212	0.997234826
S10_107898687	10	108608134	0.007602586	0.444071588	447	0.082200343	0.097030327	0.997234826
S1_40242113	1	40615975	0.00760726	0.151006711	447	0.082200343	0.097028015	0.997234826
S1_162408220	1	164017346	0.007608312	0.448545861	447	0.082200343	0.097027495	0.997234826
S4_194854383	4	199127851	0.007628244	0.48098434	447	0.082200343	0.097017653	0.997234826
S5_187998766	5	193042097	0.007646713	0.177852349	447	0.082200343	0.097008557	0.997234826
S5_208637755	5	214437964	0.007648072	0.116331096	447	0.082200343	0.097007888	0.997234826
S7_75985044	7	78537527	0.00765322	0.181208054	447	0.082200343	0.097005357	0.997234826
S3_194048411	3	197019227	0.007655988	0.321029083	447	0.082200343	0.097003997	0.997234826
S2_6566494	2	6492305	0.007661987	0.291946309	447	0.082200343	0.097001051	0.997234826
S8_107791302	8	110250211	0.007685191	0.370246085	447	0.082200343	0.096989678	0.997234826
S2_111357005	2	114600223	0.007689241	0.277404922	447	0.082200343	0.096987697	0.997234826
S6_164142653	6	168301464	0.007691032	0.346756152	447	0.082200343	0.096986821	0.997234826
S2_9587530	2	9772410	0.007692594	0.143176734	447	0.082200343	0.096986057	0.997234826
S6_159892705	6	164063005	0.00769364	0.43064877	447	0.082200343	0.096985546	0.997234826
S9_142919086	9	145643110	0.007707278	0.359060403	447	0.082200343	0.096978885	0.997234826
S4_154044721	4	157606124	0.007707389	0.470917226	447	0.082200343	0.096978832	0.997234826
S7_18522462	7	19182490	0.007711483	0.136465324	447	0.082200343	0.096976834	0.997234826
S2_231212164	2	238072947	0.007713219	0.120805369	447	0.082200343	0.096975988	0.997234826
S4_152524882	4	156086713	0.007718521	0.053691275	447	0.082200343	0.096973404	0.997234826
S6_112276176	6	116121460	0.007718649	0.239373602	447	0.082200343	0.096973341	0.997234826
S9_37293182	9	38800806	0.007741417	0.061521253	447	0.082200343	0.096962266	0.997234826
S9_37293214	9	38800838	0.007741417	0.061521253	447	0.082200343	0.096962266	0.997234826
S1_268334628	1	273077475	0.007745627	0.414988814	447	0.082200343	0.096960221	0.997234826
S4_194840801	4	199114274	0.007748315	0.445190157	447	0.082200343	0.096958917	0.997234826
S5_194044714	5	199471502	0.007755889	0.087248322	447	0.082200343	0.096955243	0.997234826
S5_212029505	5	217873534	0.007762179	0.345637584	447	0.082200343	0.096952195	0.997234826
S5_152566837	5	156275784	0.007765027	0.379194631	447	0.082200343	0.096950816	0.997234826
S10_30861453	10	31666545	0.00778694	0.465324385	447	0.082200343	0.096940221	0.997234826
S1_179587526	1	181575853	0.007793426	0.360178971	447	0.082200343	0.09693709	0.997234826
S2_195660058	2	201906576	0.00779999	0.338926174	447	0.082200343	0.096933926	0.997234826
S2_195660067	2	201906585	0.00779999	0.338926174	447	0.082200343	0.096933926	0.997234826
S9_9533007	9	9162075	0.007802054	0.37360179	447	0.082200343	0.096932931	0.997234826
S5_186725443	5	191466721	0.00780399	0.43064877	447	0.082200343	0.096931998	0.997234826
S3_6931439	3	6099601	0.007809546	0.357941834	447	0.082200343	0.096929323	0.997234826
S7_112946096	7	116233549	0.007811014	0.159955257	447	0.082200343	0.096928616	0.997234826
S7_112946098	7	116233551	0.007811014	0.159955257	447	0.082200343	0.096928616	0.997234826
S8_132194437	8	136175056	0.007815859	0.199105145	447	0.082200343	0.096926285	0.997234826
S9_153457572	9	156617733	0.007819941	0.248322148	447	0.082200343	0.096924322	0.997234826
S3_9111524	3	8333655	0.007829965	0.454138702	447	0.082200343	0.096919507	0.997234826
S1_280829516	1	285934900	0.007831054	0.464205817	447	0.082200343	0.096918984	0.997234826
S5_181971540	5	186556634	0.007834665	0.458612975	447	0.082200343	0.096917251	0.997234826
S10_4433354	10	4039330	0.007835509	0.451901566	447	0.082200343	0.096916846	0.997234826
S2_187124453	2	192761279	0.00783859	0.31655481	447	0.082200343	0.096915368	0.997234826
S8_106144053	8	108475763	0.007841965	0.08836689	447	0.082200343	0.09691375	0.997234826
S6_93330368	6	95990019	0.007856594	0.158836689	447	0.082200343	0.096906745	0.997234826
S9_120686614	9	122462251	0.007857015	0.157718121	447	0.082200343	0.096906544	0.997234826
S7_133287021	7	137399962	0.007857161	0.401565996	447	0.082200343	0.096906474	0.997234826
S7_133287031	7	137399972	0.007857161	0.401565996	447	0.082200343	0.096906474	0.997234826
S2_12068427	2	12372298	0.007859318	0.410514541	447	0.082200343	0.096905442	0.997234826
S1_158475344	1	159880928	0.007868284	0.357941834	447	0.082200343	0.096901157	0.997234826
S2_83776269	2	86025617	0.007876875	0.422818792	447	0.082200343	0.096897055	0.997234826
S3_6931435	3	6099597	0.007882298	0.359060403	447	0.082200343	0.096894468	0.997234826
S2_164980731	2	169711157	0.007888345	0.425055928	447	0.082200343	0.096891586	0.997234826
S1_195758568	1	198119340	0.007889076	0.279642058	447	0.082200343	0.096891238	0.997234826
S4_188492609	4	192661209	0.007896175	0.376957494	447	0.082200343	0.096887858	0.997234826
S5_3323405	5	3406540	0.007896403	0.293064877	447	0.082200343	0.096887749	0.997234826
S6_105884849	6	109255418	0.00789755	0.170022371	447	0.082200343	0.096887203	0.997234826
S6_168099261	6	172328653	0.007898075	0.270693512	447	0.082200343	0.096886953	0.997234826
S3_215471257	3	219080025	0.007899902	0.192393736	447	0.082200343	0.096886084	0.997234826
S1_248615642	1	252548507	0.007907176	0.16442953	447	0.082200343	0.096882626	0.997234826
S9_4331279	9	3919365	0.007928957	0.193512304	447	0.082200343	0.096872288	0.997234826
S10_2789140	10	2362021	0.00793118	0.129753915	447	0.082200343	0.096871235	0.997234826
S2_14897373	2	15322204	0.007933085	0.378076063	447	0.082200343	0.096870332	0.997234826
S2_182624581	2	188133679	0.007936956	0.158836689	447	0.082200343	0.096868499	0.997234826
S4_206501728	4	211058405	0.00794663	0.439597315	447	0.082200343	0.096863922	0.997234826
S4_185521444	4	188981590	0.007947174	0.234899329	447	0.082200343	0.096863665	0.997234826
S9_143953429	9	146753532	0.007947202	0.338926174	447	0.082200343	0.096863651	0.997234826
S4_335165	4	526473	0.007952497	0.201342282	447	0.082200343	0.096861149	0.997234826
S5_165860076	5	169756990	0.007953305	0.312080537	447	0.082200343	0.096860767	0.997234826
S5_165860075	5	169756989	0.007953305	0.312080537	447	0.082200343	0.096860767	0.997234826
S9_154649878	9	157823172	0.007957075	0.302013423	447	0.082200343	0.096858986	0.997234826
S6_166949560	6	171099690	0.007964266	0.325503356	447	0.082200343	0.096855592	0.997234826
S3_28619500	3	28238525	0.007973973	0.410514541	447	0.082200343	0.096851016	0.997234826
S4_335183	4	526491	0.007974235	0.220357942	447	0.082200343	0.096850892	0.997234826
S4_206339205	4	210896259	0.007975858	0.244966443	447	0.082200343	0.096850127	0.997234826
S4_58295674	4	60632256	0.007984883	0.083892617	447	0.082200343	0.096845879	0.997234826
S7_160778575	7	166260293	0.007987704	0.427293065	447	0.082200343	0.096844551	0.997234826
S7_160778576	7	166260294	0.007987704	0.427293065	447	0.082200343	0.096844551	0.997234826
S7_160778579	7	166260297	0.007987704	0.427293065	447	0.082200343	0.096844551	0.997234826
S7_160778588	7	166260306	0.007987704	0.427293065	447	0.082200343	0.096844551	0.997234826
S7_160778589	7	166260307	0.007987704	0.427293065	447	0.082200343	0.096844551	0.997234826
S7_160778591	7	166260309	0.007987704	0.427293065	447	0.082200343	0.096844551	0.997234826
S7_160778594	7	166260312	0.007987704	0.427293065	447	0.082200343	0.096844551	0.997234826
S1_10995497	1	11161733	0.007994498	0.218120805	447	0.082200343	0.096841357	0.997234826
S2_149785808	2	154380407	0.007995133	0.15212528	447	0.082200343	0.096841059	0.997234826
S5_33495260	5	34654135	0.007997204	0.37360179	447	0.082200343	0.096840086	0.997234826
S4_217459460	4	221594089	0.008005867	0.426174497	447	0.082200343	0.096836019	0.997234826
S9_145060326	9	147879008	0.008017501	0.397091723	447	0.082200343	0.096830563	0.997234826
S5_68651706	5	70577795	0.00803131	0.438478747	447	0.082200343	0.096824099	0.997234826
S6_69259861	6	72196294	0.008037977	0.350111857	447	0.082200343	0.096820982	0.997234826
S9_128661911	9	130902439	0.008039804	0.445190157	447	0.082200343	0.096820128	0.997234826
S6_107476046	6	112124700	0.008043477	0.045861298	447	0.082200343	0.096818412	0.997234826
S10_2007021	10	1563583	0.008045581	0.064876957	447	0.082200343	0.09681743	0.997234826
S6_163101389	6	167328433	0.008047341	0.286353468	447	0.082200343	0.096816608	0.997234826
S1_271315149	1	276048014	0.008053353	0.102908277	447	0.082200343	0.096813803	0.997234826
S2_202321737	2	208896840	0.008055293	0.441834452	447	0.082200343	0.096812898	0.997234826
S3_201185777	3	204371366	0.008057184	0.25950783	447	0.082200343	0.096812016	0.997234826
S3_115307231	3	115652201	0.008058595	0.363534676	447	0.082200343	0.096811359	0.997234826
S5_22355367	5	22862860	0.008076191	0.099552573	447	0.082200343	0.096803166	0.997234826
S5_22355392	5	22862885	0.0080779	0.098434004	447	0.082200343	0.096802371	0.997234826
S5_82953709	5	85120478	0.008081681	0.324384787	447	0.082200343	0.096800614	0.997234826
S5_66833555	5	68747777	0.008089447	0.395973154	447	0.082200343	0.096797007	0.997234826
S5_200529175	5	206007654	0.008092037	0.402684564	447	0.082200343	0.096795805	0.997234826
S4_180269030	4	183236127	0.008097843	0.440715884	447	0.082200343	0.096793111	0.997234826
S6_95321424	6	98071766	0.00809847	0.294183445	447	0.082200343	0.09679282	0.997234826
S3_170127262	3	172751585	0.008102297	0.222595078	447	0.082200343	0.096791046	0.997234826
S4_198378348	4	202679996	0.008107302	0.441834452	447	0.082200343	0.096788726	0.997234826
S2_33469508	2	34996418	0.008109391	0.217002237	447	0.082200343	0.096787759	0.997234826
S1_199070422	1	201578912	0.008122373	0.10738255	447	0.082200343	0.096781752	0.997234826
S3_28008375	3	27601559	0.008126856	0.243847875	447	0.082200343	0.096779679	0.997234826
S1_3554957	1	3651548	0.008130474	0.111856823	447	0.082200343	0.096778008	0.997234826
S1_180513091	1	182481137	0.008131625	0.345637584	447	0.082200343	0.096777476	0.997234826
S1_80679168	1	82293654	0.008139782	0.474272931	447	0.082200343	0.096773711	0.997234826
S2_169309141	2	174135054	0.008142186	0.342281879	447	0.082200343	0.096772603	0.997234826
S7_160778498	7	166260216	0.008143078	0.302013423	447	0.082200343	0.096772191	0.997234826
S8_3482889	8	3681609	0.008146039	0.46196868	447	0.082200343	0.096770826	0.997234826
S2_234030291	2	242173961	0.008146108	0.337807606	447	0.082200343	0.096770795	0.997234826
S2_234030296	2	242173966	0.008146108	0.337807606	447	0.082200343	0.096770795	0.997234826
S2_234030302	2	242173972	0.008146108	0.337807606	447	0.082200343	0.096770795	0.997234826
S2_234030309	2	242173979	0.008146108	0.337807606	447	0.082200343	0.096770795	0.997234826
S2_234030315	2	242173985	0.008146108	0.337807606	447	0.082200343	0.096770795	0.997234826
S6_57491574	6	60225930	0.008161228	0.408277405	447	0.082200343	0.096763831	0.997234826
S10_119759273	10	120809968	0.008166608	0.053691275	447	0.082200343	0.096761357	0.997234826
S8_74681888	8	75939150	0.008166771	0.288590604	447	0.082200343	0.096761282	0.997234826
S8_105574699	8	107892570	0.008169595	0.492170022	447	0.082200343	0.096759983	0.997234826
S2_55894978	2	57957083	0.008170068	0.214765101	447	0.082200343	0.096759767	0.997234826
S7_78347529	7	81041982	0.008171668	0.450782998	447	0.082200343	0.096759031	0.997234826
S9_120747864	9	122522935	0.008173852	0.417225951	447	0.082200343	0.096758028	0.997234826
S4_141090319	4	144243630	0.008177419	0.108501119	447	0.082200343	0.09675639	0.997234826
S3_3027174	3	2277294	0.008181967	0.130872483	447	0.082200343	0.096754302	0.997234826
S5_64119770	5	66027067	0.008197787	0.274049217	447	0.082200343	0.09674705	0.997234826
S5_70082770	5	72078152	0.008198437	0.175615213	447	0.082200343	0.096746752	0.997234826
S4_213512804	4	217569418	0.008199345	0.36689038	447	0.082200343	0.096746336	0.997234826
S7_12275150	7	12686588	0.008199718	0.464205817	447	0.082200343	0.096746165	0.997234826
S1_281164046	1	286265405	0.008208703	0.272930649	447	0.082200343	0.096742054	0.997234826
S5_186725255	5	191466533	0.008209414	0.157718121	447	0.082200343	0.096741728	0.997234826
S4_178386885	4	181353853	0.008211406	0.403803132	447	0.082200343	0.096740818	0.997234826
S2_203596444	2	210168602	0.008214678	0.422818792	447	0.082200343	0.096739322	0.997234826
S2_5898791	2	5846932	0.008231597	0.180089485	447	0.082200343	0.096731598	0.997234826
S3_220809876	3	224549273	0.008233166	0.258389262	447	0.082200343	0.096730883	0.997234826
S4_79106228	4	81954179	0.008234784	0.168903803	447	0.082200343	0.096730145	0.997234826
S7_12848541	7	13310148	0.008236857	0.099552573	447	0.082200343	0.0967292	0.997234826
S6_35680207	6	37234759	0.008239004	0.332214765	447	0.082200343	0.096728221	0.997234826
S1_192402899	1	194690856	0.008240024	0.186800895	447	0.082200343	0.096727757	0.997234826
S10_76950224	10	76305730	0.008240882	0.170022371	447	0.082200343	0.096727366	0.997234826
S9_153841303	9	156989088	0.008244864	0.129753915	447	0.082200343	0.096725553	0.997234826
S2_5898779	2	5846920	0.00825475	0.432885906	447	0.082200343	0.096721055	0.997234826
S3_148876791	3	150186123	0.008260546	0.420581655	447	0.082200343	0.09671842	0.997234826
S5_186504609	5	191242452	0.008264052	0.419463087	447	0.082200343	0.096716827	0.997234826
S10_147597363	10	148402220	0.008271278	0.389261745	447	0.082200343	0.096713546	0.997234826
S2_85861655	2	88135146	0.008273091	0.419463087	447	0.082200343	0.096712723	0.997234826
S2_222435158	2	229465250	0.008278672	0.31655481	447	0.082200343	0.096710192	0.997234826
S2_206419296	2	213307340	0.008287423	0.274049217	447	0.082200343	0.096706227	0.997234826
S8_167663701	8	172916118	0.008307852	0.363534676	447	0.082200343	0.096696986	0.997234826
S2_40004372	2	41640690	0.008313361	0.401565996	447	0.082200343	0.096694499	0.997234826
S3_6976782	3	6143783	0.008320342	0.313199105	447	0.082200343	0.096691349	0.997234826
S4_236882650	4	242135817	0.008322278	0.263982103	447	0.082200343	0.096690475	0.997234826
S3_185966763	3	188897048	0.00832344	0.293064877	447	0.082200343	0.096689952	0.997234826
S3_1721394	3	1009483	0.008327042	0.374720358	447	0.082200343	0.096688328	0.997234826
S3_165852583	3	168472892	0.008338556	0.446308725	447	0.082200343	0.096683142	0.997234826
S1_266098504	1	270921378	0.008339534	0.477628635	447	0.082200343	0.096682702	0.997234826
S3_218324817	3	221943887	0.008340475	0.387024609	447	0.082200343	0.096682279	0.997234826
S2_234030292	2	242173962	0.008341356	0.337807606	447	0.082200343	0.096681882	0.997234826
S2_108869506	2	111957453	0.008341586	0.416107383	447	0.082200343	0.096681779	0.997234826
S6_67454947	6	70419183	0.008344389	0.161073826	447	0.082200343	0.096680518	0.997234826
S1_290200474	1	295684207	0.008353638	0.472035794	447	0.082200343	0.096676361	0.997234826
S9_41113508	9	42702243	0.008364999	0.463087248	447	0.082200343	0.096671261	0.997234826
S2_203952326	2	210513661	0.008370511	0.409395973	447	0.082200343	0.096668789	0.997234826
S1_3197122	1	3290728	0.008374272	0.458612975	447	0.082200343	0.096667104	0.997234826
S7_99536398	7	102652318	0.008376111	0.343400447	447	0.082200343	0.09666628	0.997234826
S4_34844	4	222983	0.008377768	0.204697987	447	0.082200343	0.096665538	0.997234826
S1_199640618	1	202103909	0.008379524	0.326621924	447	0.082200343	0.096664752	0.997234826
S6_34635473	6	36172335	0.008380024	0.388143177	447	0.082200343	0.096664528	0.997234826
S1_34596954	1	34901419	0.008383508	0.199105145	447	0.082200343	0.096662968	0.997234826
S1_299748796	1	305345222	0.008384979	0.468680089	447	0.082200343	0.096662309	0.997234826
S1_230883149	1	234436944	0.008390725	0.456375839	447	0.082200343	0.096659739	0.997234826
S1_258883516	1	263525220	0.008397037	0.447427293	447	0.082200343	0.096656918	0.997234826
S3_5578730	3	4744384	0.008398325	0.412751678	447	0.082200343	0.096656342	0.997234826
S9_16248628	9	15991988	0.008402247	0.243847875	447	0.082200343	0.09665459	0.997234826
S8_159898968	8	164801469	0.008403808	0.261744966	447	0.082200343	0.096653894	0.997234826
S7_162806481	7	168315680	0.008404573	0.418344519	447	0.082200343	0.096653552	0.997234826
S8_170777732	8	176019019	0.008413869	0.293064877	447	0.082200343	0.096649405	0.997234826
S7_156019225	7	161422991	0.008420764	0.276286353	447	0.082200343	0.096646331	0.997234826
S9_94351086	9	97779504	0.008428675	0.170022371	447	0.082200343	0.096642809	0.997234826
S2_2540700	2	2554622	0.008439907	0.321029083	447	0.082200343	0.096637813	0.997234826
S10_4098632	10	3800863	0.008440844	0.323266219	447	0.082200343	0.096637396	0.997234826
S10_4098648	10	3800879	0.008440844	0.323266219	447	0.082200343	0.096637396	0.997234826
S2_109001385	2	112117161	0.008443636	0.364653244	447	0.082200343	0.096636155	0.997234826
S1_162789492	1	164427714	0.008445419	0.38590604	447	0.082200343	0.096635364	0.997234826
S1_279571268	1	284698387	0.008447632	0.474272931	447	0.082200343	0.096634381	0.997234826
S1_197069108	1	199515885	0.008447744	0.195749441	447	0.082200343	0.096634331	0.997234826
S3_148281810	3	149596623	0.008458994	0.351230425	447	0.082200343	0.096629338	0.997234826
S3_148281819	3	149596632	0.008458994	0.351230425	447	0.082200343	0.096629338	0.997234826
S3_148281827	3	149596640	0.008458994	0.351230425	447	0.082200343	0.096629338	0.997234826
S3_10521727	3	9819998	0.008465087	0.450782998	447	0.082200343	0.096626638	0.997234826
S10_141282530	10	142064656	0.008465576	0.118568233	447	0.082200343	0.096626421	0.997234826
S7_76299852	7	78853540	0.008465673	0.138702461	447	0.082200343	0.096626378	0.997234826
S1_223626468	1	227224354	0.008469237	0.340044743	447	0.082200343	0.096624799	0.997234826
S1_223626470	1	227224356	0.008469237	0.340044743	447	0.082200343	0.096624799	0.997234826
S1_223626475	1	227224361	0.008469237	0.340044743	447	0.082200343	0.096624799	0.997234826
S1_212983724	1	216043847	0.008473981	0.397091723	447	0.082200343	0.096622698	0.997234826
S3_223535512	3	227285139	0.008474832	0.11409396	447	0.082200343	0.096622322	0.997234826
S5_200938205	5	206414795	0.008475051	0.387024609	447	0.082200343	0.096622225	0.997234826
S2_208081164	2	214893567	0.008477492	0.325503356	447	0.082200343	0.096621145	0.997234826
S1_179586536	1	181574863	0.008479526	0.268456376	447	0.082200343	0.096620245	0.997234826
S3_10518139	3	9816410	0.008479673	0.067114094	447	0.082200343	0.09662018	0.997234826
S7_167149694	7	172760710	0.008482137	0.211409396	447	0.082200343	0.09661909	0.997234826
S7_76577503	7	79130611	0.008491344	0.127516779	447	0.082200343	0.096615021	0.997234826
S3_33240494	3	32865530	0.008491845	0.249440716	447	0.082200343	0.096614799	0.997234826
S1_173225112	1	175162011	0.008493596	0.20917226	447	0.082200343	0.096614026	0.997234826
S2_214614889	2	221399044	0.008494384	0.445190157	447	0.082200343	0.096613678	0.997234826
S9_15617740	9	15356377	0.008497686	0.477628635	447	0.082200343	0.09661222	0.997234826
S2_7745287	2	7735067	0.008498687	0.474272931	447	0.082200343	0.096611779	0.997234826
S2_192802338	2	198537342	0.008499392	0.29753915	447	0.082200343	0.096611468	0.997234826
S2_192802348	2	198537352	0.008499392	0.29753915	447	0.082200343	0.096611468	0.997234826
S5_177125116	5	181177597	0.008499994	0.097315436	447	0.082200343	0.096611202	0.997234826
S1_276207673	1	281129379	0.008502325	0.266219239	447	0.082200343	0.096610174	0.997234826
S5_206312348	5	211945067	0.008503083	0.086129754	447	0.082200343	0.096609839	0.997234826
S3_227273474	3	231180877	0.008508319	0.255033557	447	0.082200343	0.09660753	0.997234826
S4_16128619	4	17280324	0.008511034	0.153243848	447	0.082200343	0.096606333	0.997234826
S8_172894079	8	178191839	0.008515512	0.310961969	447	0.082200343	0.096604361	0.997234826
S1_298414379	1	303909382	0.008517713	0.427293065	447	0.082200343	0.096603391	0.997234826
S1_7084877	1	7072719	0.008526921	0.261744966	447	0.082200343	0.096599339	0.997234826
S2_211722514	2	218527086	0.008552454	0.304250559	447	0.082200343	0.096588126	0.997234826
S5_210058110	5	215878343	0.008553392	0.343400447	447	0.082200343	0.096587715	0.997234826
S7_133286995	7	137399936	0.008556678	0.234899329	447	0.082200343	0.096586275	0.997234826
S10_27125779	10	27884786	0.008570052	0.468680089	447	0.082200343	0.096580418	0.997234826
S3_147411072	3	148714760	0.008570095	0.257270694	447	0.082200343	0.096580399	0.997234826
S4_177341711	4	180315168	0.008571965	0.426174497	447	0.082200343	0.096579581	0.997234826
S7_173888933	7	179416610	0.008580385	0.092841163	447	0.082200343	0.096575899	0.997234826
S3_219698822	3	223385607	0.008585732	0.081655481	447	0.082200343	0.096573563	0.997234826
S3_219844499	3	223536176	0.008592179	0.276286353	447	0.082200343	0.096570749	0.997234826
S1_213098580	1	216171704	0.008593863	0.390380313	447	0.082200343	0.096570014	0.997234826
S6_4885095	6	4929119	0.008596354	0.479865772	447	0.082200343	0.096568928	0.997234826
S2_234111616	2	242255927	0.008598301	0.410514541	447	0.082200343	0.096568079	0.997234826
S8_22937160	8	23662639	0.008598391	0.42393736	447	0.082200343	0.096568039	0.997234826
S7_49734378	7	51337282	0.008606862	0.42393736	447	0.082200343	0.096564347	0.997234826
S1_269023610	1	273743053	0.008624323	0.37360179	447	0.082200343	0.096556749	0.997234826
S10_147122467	10	147923738	0.00862437	0.242729306	447	0.082200343	0.096556728	0.997234826
S3_154658338	3	156125970	0.008624801	0.197986577	447	0.082200343	0.096556541	0.997234826
S5_215012652	5	220891746	0.008631647	0.376957494	447	0.082200343	0.096553566	0.997234826
S2_14893080	2	15317911	0.008640613	0.127516779	447	0.082200343	0.096549673	0.997234826
S1_243814588	1	247477373	0.008646392	0.333333333	447	0.082200343	0.096547167	0.997234826
S9_124643230	9	126697310	0.008646664	0.325503356	447	0.082200343	0.096547049	0.997234826
S8_11396434	8	11796187	0.008650747	0.399328859	447	0.082200343	0.096545279	0.997234826
S3_3836300	3	3093123	0.00865666	0.298657718	447	0.082200343	0.096542718	0.997234826
S9_17445898	9	17209632	0.008656871	0.298657718	447	0.082200343	0.096542626	0.997234826
S9_154024869	9	157173326	0.008658646	0.255033557	447	0.082200343	0.096541858	0.997234826
S7_15338920	7	15831243	0.008664122	0.46196868	447	0.082200343	0.096539488	0.997234826
S8_107877813	8	110331213	0.00866526	0.300894855	447	0.082200343	0.096538995	0.997234826
S4_194854423	4	199127891	0.008668532	0.482102908	447	0.082200343	0.09653758	0.997234826
S3_173513534	3	175957857	0.008672724	0.395973154	447	0.082200343	0.096535767	0.997234826
S6_155210575	6	159347200	0.008674785	0.128635347	447	0.082200343	0.096534877	0.997234826
S5_189458104	5	194535546	0.008681125	0.491051454	447	0.082200343	0.096532138	0.997234826
S2_18133454	2	19342554	0.008688809	0.407158837	447	0.082200343	0.096528822	0.997234826
S2_14255952	2	14714240	0.008691608	0.479865772	447	0.082200343	0.096527614	0.997234826
S7_99384864	7	102493458	0.008695325	0.426174497	447	0.082200343	0.096526012	0.997234826
S3_221566246	3	225331563	0.008702921	0.239373602	447	0.082200343	0.096522739	0.997234826
S5_5548623	5	5731503	0.008706778	0.476510067	447	0.082200343	0.096521078	0.997234826
S9_35763672	9	37244864	0.008736616	0.054809843	447	0.082200343	0.096508255	0.997234826
S1_244512858	1	248204604	0.008739424	0.437360179	447	0.082200343	0.096507051	0.997234826
S3_217808852	3	221417974	0.008742664	0.187919463	447	0.082200343	0.096505661	0.997234826
S3_9427257	3	8655974	0.00874636	0.422818792	447	0.082200343	0.096504078	0.997234826
S3_10674643	3	9975858	0.008748332	0.435123043	447	0.082200343	0.096503233	0.997234826
S7_105502499	7	108768632	0.008749135	0.261744966	447	0.082200343	0.096502889	0.997234826
S3_147971504	3	149278409	0.008753125	0.170022371	447	0.082200343	0.09650118	0.997234826
S10_140851957	10	141562309	0.008757203	0.406040268	447	0.082200343	0.096499434	0.997234826
S1_249900013	1	253761574	0.008758519	0.286353468	447	0.082200343	0.096498871	0.997234826
S2_14328079	2	14786643	0.008763078	0.467561521	447	0.082200343	0.096496921	0.997234826
S8_125197779	8	128625941	0.008772755	0.299776286	447	0.082200343	0.096492785	0.997234826
S10_126490179	10	127515798	0.008786637	0.115212528	447	0.082200343	0.09648686	0.997234826
S3_223961631	3	227714100	0.008789485	0.096196868	447	0.082200343	0.096485645	0.997234826
S7_40327099	7	41809687	0.008795063	0.275167785	447	0.082200343	0.096483268	0.997234826
S8_18349937	8	18983260	0.008797797	0.272930649	447	0.082200343	0.096482103	0.997234826
S8_170846904	8	176088162	0.008801762	0.274049217	447	0.082200343	0.096480415	0.997234826
S5_40152	5	52505	0.008806603	0.391498881	447	0.082200343	0.096478355	0.997234826
S6_153783665	6	157964565	0.008807841	0.393736018	447	0.082200343	0.096477828	0.997234826
S1_272349353	1	277131286	0.008815907	0.312080537	447	0.082200343	0.096474398	0.997234826
S3_134718708	3	135396848	0.008816723	0.267337808	447	0.082200343	0.096474051	0.997234826
S1_79068826	1	80601445	0.008817839	0.092841163	447	0.082200343	0.096473577	0.997234826
S6_57125897	6	59750294	0.008819944	0.46196868	447	0.082200343	0.096472683	0.997234826
S8_5295705	8	5543336	0.008823203	0.282997763	447	0.082200343	0.096471298	0.997234826
S2_12683502	2	12957938	0.008834134	0.46196868	447	0.082200343	0.09646666	0.997234826
S9_97740500	9	101162541	0.008834678	0.140939597	447	0.082200343	0.096466429	0.997234826
S2_110088004	2	113250740	0.008836267	0.43064877	447	0.082200343	0.096465755	0.997234826
S6_168099262	6	172328654	0.008836268	0.268456376	447	0.082200343	0.096465754	0.997234826
S8_106235144	8	108569515	0.008838496	0.357941834	447	0.082200343	0.09646481	0.997234826
S9_153963436	9	157111962	0.008847473	0.472035794	447	0.082200343	0.096461006	0.997234826
S9_13462524	9	13121375	0.008847749	0.115212528	447	0.082200343	0.096460889	0.997234826
S9_153435887	9	156596054	0.008868007	0.360178971	447	0.082200343	0.096452321	0.997234826
S6_100083435	6	103272206	0.008872205	0.378076063	447	0.082200343	0.096450548	0.997234826
S5_45180120	5	46522411	0.008876706	0.421700224	447	0.082200343	0.096448648	0.997234826
S2_121523296	2	125544773	0.008888876	0.431767338	447	0.082200343	0.096443516	0.997234826
S7_8267783	7	8565055	0.008899754	0.065995526	447	0.082200343	0.096438934	0.997234826
S3_186215483	3	189146279	0.008901306	0.427293065	447	0.082200343	0.096438281	0.997234826
S3_186215486	3	189146282	0.008901306	0.427293065	447	0.082200343	0.096438281	0.997234826
S2_18133136	2	19342236	0.008904148	0.444071588	447	0.082200343	0.096437085	0.997234826
S9_153958945	9	157107471	0.00890726	0.265100671	447	0.082200343	0.096435776	0.997234826
S2_2033419	2	2030458	0.00890739	0.151006711	447	0.082200343	0.096435721	0.997234826
S1_81106953	1	82712474	0.008908559	0.409395973	447	0.082200343	0.09643523	0.997234826
S8_123530225	8	126908999	0.008908824	0.465324385	447	0.082200343	0.096435119	0.997234826
S2_182636322	2	188145420	0.00891067	0.31655481	447	0.082200343	0.096434342	0.997234826
S9_142296904	9	144964160	0.008914998	0.469798658	447	0.082200343	0.096432524	0.997234826
S4_182576880	4	185931351	0.008917913	0.148769575	447	0.082200343	0.096431299	0.997234826
S5_176489508	5	180474558	0.008926226	0.262863535	447	0.082200343	0.096427809	0.997234826
S9_17446280	9	17210014	0.008929195	0.325503356	447	0.082200343	0.096426563	0.997234826
S5_2147943	5	2205304	0.008937207	0.269574944	447	0.082200343	0.096423204	0.997234826
S1_199737680	1	202181236	0.008942088	0.165548098	447	0.082200343	0.096421159	0.997234826
S2_184746197	2	190335891	0.008944399	0.239373602	447	0.082200343	0.096420191	0.997234826
S7_130081855	7	134101822	0.008946112	0.428411633	447	0.082200343	0.096419474	0.997234826
S2_5998595	2	5947673	0.008946953	0.284116331	447	0.082200343	0.096419122	0.997234826
S1_81786396	1	83420053	0.008947373	0.356823266	447	0.082200343	0.096418946	0.997234826
S4_193355582	4	197669314	0.008949428	0.143176734	447	0.082200343	0.096418086	0.997234826
S5_127936216	5	131295251	0.00895536	0.172259508	447	0.082200343	0.096415604	0.997234826
S10_141642193	10	142429261	0.00896879	0.457494407	447	0.082200343	0.096409992	0.997234826
S1_258521836	1	263159379	0.008975001	0.37360179	447	0.082200343	0.096407399	0.997234826
S9_124642991	9	126697071	0.008982301	0.343400447	447	0.082200343	0.096404354	0.997234826
S4_147123377	4	150498057	0.00899322	0.418344519	447	0.082200343	0.096399805	0.997234826
S4_147123421	4	150498101	0.00899322	0.418344519	447	0.082200343	0.096399805	0.997234826
S1_53154819	1	53752874	0.008994036	0.214765101	447	0.082200343	0.096399465	0.997234826
S5_135455232	5	138746669	0.008995244	0.282997763	447	0.082200343	0.096398962	0.997234826
S5_176347221	5	180382638	0.008995751	0.300894855	447	0.082200343	0.096398751	0.997234826
S1_165993411	1	167707784	0.009001846	0.196868009	447	0.082200343	0.096396214	0.997234826
S1_239612127	1	243204609	0.009001868	0.288590604	447	0.082200343	0.096396205	0.997234826
S3_5332173	3	4495118	0.00900206	0.394854586	447	0.082200343	0.096396125	0.997234826
S8_154106868	8	158850448	0.009002886	0.327740492	447	0.082200343	0.096395782	0.997234826
S10_28015972	10	28761853	0.009003951	0.121923937	447	0.082200343	0.096395339	0.997234826
S1_31772518	1	32076912	0.009004282	0.083892617	447	0.082200343	0.096395201	0.997234826
S6_4884985	6	4929009	0.009004326	0.282997763	447	0.082200343	0.096395183	0.997234826
S3_6743361	3	5917726	0.009008651	0.387024609	447	0.082200343	0.096393385	0.997234826
S2_233115599	2	240010077	0.009024028	0.408277405	447	0.082200343	0.096386998	0.997234826
S5_188755942	5	193774754	0.009033589	0.27852349	447	0.082200343	0.096383033	0.997234826
S4_18936965	4	20119752	0.009037434	0.439597315	447	0.082200343	0.09638144	0.997234826
S3_6743330	3	5917695	0.009045991	0.258389262	447	0.082200343	0.096377896	0.997234826
S3_6743362	3	5917727	0.009045991	0.258389262	447	0.082200343	0.096377896	0.997234826
S7_93923117	7	96936994	0.009046969	0.4049217	447	0.082200343	0.096377491	0.997234826
S2_9011328	2	9186117	0.009055438	0.453020134	447	0.082200343	0.096373988	0.997234826
S9_32583966	9	34000261	0.009061399	0.266219239	447	0.082200343	0.096371524	0.997234826
S3_20307824	3	19725277	0.009062458	0.20917226	447	0.082200343	0.096371086	0.997234826
S10_141282525	10	142064651	0.009066613	0.116331096	447	0.082200343	0.09636937	0.997234826
S2_4988599	2	4918930	0.00906674	0.38590604	447	0.082200343	0.096369318	0.997234826
S2_4988600	2	4918931	0.00906674	0.38590604	447	0.082200343	0.096369318	0.997234826
S2_4988603	2	4918934	0.00906674	0.38590604	447	0.082200343	0.096369318	0.997234826
S5_114630803	5	117520504	0.009071628	0.250559284	447	0.082200343	0.0963673	0.997234826
S8_164895913	8	170072252	0.009072495	0.389261745	447	0.082200343	0.096366942	0.997234826
S7_133360372	7	137472961	0.00907427	0.332214765	447	0.082200343	0.09636621	0.997234826
S2_214000445	2	220804980	0.009081151	0.458612975	447	0.082200343	0.096363372	0.997234826
S10_76950383	10	76305889	0.009081976	0.218120805	447	0.082200343	0.096363032	0.997234826
S3_173738440	3	176202420	0.009082209	0.346756152	447	0.082200343	0.096362936	0.997234826
S8_36544301	8	37558957	0.00908514	0.07606264	447	0.082200343	0.096361728	0.997234826
S1_214979687	1	218140802	0.00908712	0.427293065	447	0.082200343	0.096360912	0.997234826
S2_12101892	2	12405761	0.009088605	0.159955257	447	0.082200343	0.0963603	0.997234826
S6_131360782	6	135449311	0.009090256	0.299776286	447	0.082200343	0.09635962	0.997234826
S1_211524612	1	214578050	0.009099798	0.331096197	447	0.082200343	0.096355692	0.997234826
S2_108869795	2	111957741	0.009103258	0.421700224	447	0.082200343	0.096354269	0.997234826
S8_173607440	8	178834275	0.009116337	0.289709172	447	0.082200343	0.096348894	0.997234826
S3_22819977	3	22281586	0.009120582	0.493288591	447	0.082200343	0.096347152	0.997234826
S1_268948981	1	273670225	0.009135938	0.336689038	447	0.082200343	0.096340854	0.997234826
S1_268948972	1	273670216	0.009135938	0.336689038	447	0.082200343	0.096340854	0.997234826
S4_160021520	4	163040912	0.009143461	0.318791946	447	0.082200343	0.096337773	0.997234826
S8_36544294	8	37558950	0.009146643	0.077181208	447	0.082200343	0.096336471	0.997234826
S1_268167490	1	272913767	0.009157055	0.124161074	447	0.082200343	0.096332213	0.997234826
S3_180769885	3	183667547	0.009162944	0.434004474	447	0.082200343	0.096329806	0.997234826
S6_164730037	6	168875683	0.009165557	0.342281879	447	0.082200343	0.096328739	0.997234826
S6_35280085	6	36825451	0.009168039	0.302013423	447	0.082200343	0.096327725	0.997234826
S3_165856137	3	168476446	0.009175391	0.434004474	447	0.082200343	0.096324725	0.997234826
S3_165856146	3	168476455	0.009175391	0.434004474	447	0.082200343	0.096324725	0.997234826
S5_3258092	5	3342918	0.009184367	0.192393736	447	0.082200343	0.096321066	0.997234826
S6_93494801	6	96208078	0.009184479	0.445190157	447	0.082200343	0.09632102	0.997234826
S2_109574487	2	112705903	0.00918535	0.212527964	447	0.082200343	0.096320665	0.997234826
S8_150560815	8	155128927	0.009192427	0.131991051	447	0.082200343	0.096317783	0.997234826
S7_105502497	7	108768630	0.009193476	0.260626398	447	0.082200343	0.096317356	0.997234826
S2_7745332	2	7735112	0.009194399	0.477628635	447	0.082200343	0.09631698	0.997234826
S5_168889291	5	172837736	0.009198821	0.439597315	447	0.082200343	0.096315181	0.997234826
S5_200938223	5	206414813	0.009198822	0.401565996	447	0.082200343	0.09631518	0.997234826
S6_148828165	6	152872438	0.009200792	0.39261745	447	0.082200343	0.096314379	0.997234826
S3_7212872	3	6387619	0.009212856	0.409395973	447	0.082200343	0.096309475	0.997234826
S5_883858	5	920110	0.009223115	0.333333333	447	0.082200343	0.09630531	0.997234826
S3_220913780	3	224653536	0.009223771	0.101789709	447	0.082200343	0.096305044	0.997234826
S3_2626964	3	1873729	0.009249272	0.118568233	447	0.082200343	0.096294712	0.997234826
S10_126463748	10	127490882	0.009261768	0.135346756	447	0.082200343	0.09628966	0.997234826
S5_44631262	5	45958792	0.009263545	0.163310962	447	0.082200343	0.096288942	0.997234826
S5_4583122	5	4689175	0.009269627	0.231543624	447	0.082200343	0.096286487	0.997234826
S1_232648548	1	236244514	0.009271013	0.321029083	447	0.082200343	0.096285927	0.997234826
S2_4834348	2	4808219	0.009271176	0.31655481	447	0.082200343	0.096285862	0.997234826
S1_198195264	1	200650122	0.009278271	0.118568233	447	0.082200343	0.096282999	0.997234826
S1_12169774	1	12359089	0.009281199	0.448545861	447	0.082200343	0.096281818	0.997234826
S1_273308636	1	278108941	0.009286197	0.418344519	447	0.082200343	0.096279804	0.997234826
S3_183881526	3	186834053	0.009302883	0.046979866	447	0.082200343	0.096273087	0.997234826
S2_23470405	2	24769286	0.0093062	0.374720358	447	0.082200343	0.096271754	0.997234826
S6_2382654	6	2396041	0.009309883	0.419463087	447	0.082200343	0.096270274	0.997234826
S3_225349075	3	229142602	0.009312605	0.427293065	447	0.082200343	0.09626918	0.997234826
S2_236485460	2	240685040	0.0093138	0.163310962	447	0.082200343	0.0962687	0.997234826
S3_184197025	3	187173994	0.009314885	0.17114094	447	0.082200343	0.096268264	0.997234826
S8_155905465	8	160681554	0.009315275	0.172259508	447	0.082200343	0.096268107	0.997234826
S2_130947841	2	135105104	0.009318029	0.350111857	447	0.082200343	0.096267001	0.997234826
S5_82953682	5	85120451	0.009326516	0.333333333	447	0.082200343	0.096263595	0.997234826
S2_7664265	2	7656273	0.00933188	0.369127517	447	0.082200343	0.096261444	0.997234826
S1_178424233	1	180394274	0.009336852	0.167785235	447	0.082200343	0.096259452	0.997234826
S1_178424265	1	180394306	0.009336852	0.167785235	447	0.082200343	0.096259452	0.997234826
S1_200910113	1	203402703	0.009351645	0.39261745	447	0.082200343	0.096253529	0.997234826
S9_142936490	9	145660511	0.009352958	0.381431767	447	0.082200343	0.096253004	0.997234826
S5_19300762	5	19786301	0.009354628	0.120805369	447	0.082200343	0.096252337	0.997234826
S8_172894065	8	178191825	0.009355532	0.176733781	447	0.082200343	0.096251975	0.997234826
[truncated: 232,432 more rows]
